# Supplementary material for: Metalation-induced denitrogenative reductive coupling of isocyanides on a silylene-bridged nickel cluster
Source: Royal Society of Chemistry journal article supplement (doi:10.1039/d1sc06935g), 2022-01-01
Supplement: d1sc06935g1.pdf [file d1sc06935g1.pdf]

## Supporting Information

for

### **Metalation-Induced Denitrogenative Reductive Coupling of Isocyanides on a Silylene-Bridged Nickel Cluster**

Kento Shimamoto<sup>a</sup> and Yusuke Sunada,<sup>a,b,c\*</sup>

<sup>a</sup> Department of Applied Chemistry, School of Engineering, The University of Tokyo, 4-6-1 Komaba, Meguro-ku, Tokyo 153-8505 Japan.

<sup>b</sup> Institute of Industrial Science, The University of Tokyo, 4-6-1 Komaba, Meguro-ku, Tokyo 153-8505 Japan.

<sup>c</sup> JST PRESTO, Honcho, Kawaguchi, Saitama, 332-0012 Japan.

To whom correspondence should be addressed. E-mail: sunada@iis.u-tokyo.ac.jp

#### **Contents**

|                                           |          |
|-------------------------------------------|----------|
| 1. General                                | p. S-2   |
| 2. Synthesis of Ni complexes and clusters | p. S-2   |
| 3. Actual NMR and IR charts               | p. S-5   |
| 4. Theoretical calculations               | p. S-17  |
| 5. X-ray diffraction analysis             | p. S-26  |
| 6. References                             | p. S-108 |

**General.** Manipulation of air and moisture sensitive compounds was carried out under a dry nitrogen atmosphere using Schlenk tube techniques associated with a high-vacuum line or in the glove box which was filled with dry nitrogen. All solvents were purchased from Kanto Chemical Co. Inc., and was dried over activated molecular sieves.  $^1\text{H}$ ,  $^{13}\text{C}$ ,  $^{29}\text{Si}$  NMR spectra were recorded on a JEOL Lambda 400 spectrometer at ambient temperature unless otherwise noted.  $^1\text{H}$ ,  $^{13}\text{C}$ ,  $^{29}\text{Si}$  NMR chemical shifts ( $\delta$  values) were given in ppm relative to the solvent signal ( $^1\text{H}$ ,  $^{13}\text{C}$ ) or standard resonances ( $^{29}\text{Si}$ : external tetramethylsilane). Elemental analyses were performed by a Thermo Scientific FLASH 2000 Organic Elemental Analyzer. IR spectra were recorded on a PerkinElmer Spectrum Two spectrometer. The starting compounds,  $\text{Si}_4\text{Pr}_8^1$ ,  $\text{Si}_4(\text{cyclopentyl})_8^2$  and  $\text{Si}_4\text{Ph}_8^3$  were synthesized by the method reported in the literature. All reagents were purchased from Tokyo Chemical Industries Co., Ltd. or Sigma-Aldrich, and were used without further purification.

**Synthesis of  $(\text{Me}_2\text{IM}^{\text{Et}})_2\text{Ni}(\text{Ph}_2\text{SiSiPh}_2\text{SiPh}_2\text{SiPh}_2)_4$  (**2**).** In a 50 mL schlenk tube, toluene (2 mL) solution of  $\text{Me}_2\text{IM}^{\text{Et}}$  (41.8 mg, 0.275 mmol) was added to the toluene (1 mL) solution of  $\text{Ni}(\text{cod})_2$  (37.7 mg, 0.137 mmol), then  $\text{Si}_4\text{Ph}_8$  (**1c**) (100.0 mg, 0.137 mmol) suspended in toluene (2 mL) was added to this mixture. The solution was stirred at 80 °C for 48 h, then the solvent was removed *in vacuo*. The obtained crude product was dissolved in diethyl ether (5 mL), and the solution was centrifuged to remove the small amounts of insoluble materials. Pentane (5 mL) was added to the mother liquid, and the mixture was cooled to -20 °C, to form **2** as orange crystals in 48 % yield (72.0 mg, 0.0659 mmol).  $^1\text{H}$  NMR (400 MHz, r.t.,  $\text{C}_6\text{D}_6$ ):  $\delta$  = 0.52 ppm (t,  $J$  = 7.8 Hz, 12H,  $\text{CH}_2\text{CH}_3$ ), 1.61 ppm (q,  $J$  = 7.8 Hz, 8H,  $\text{CH}_2\text{CH}_3$ ), 3.04 ppm (s, 12H, C=C- $\text{CH}_3$ ), 6.98-7.14 ppm (m, 24H, Ph), 7.73-7.75 ppm (m, 8H, Ph), 7.87-7.89 ppm (m, 8H, Ph).  $^{13}\text{C}$  NMR (100 MHz, r.t.,  $\text{C}_6\text{D}_6$ ): 14.25 ppm (s,  $\text{CH}_2\text{CH}_3$ ), 16.64 ppm (s,  $\text{CH}_2\text{CH}_3$ ), 35.11 ppm (s, C=C- $\text{CH}_3$ ), 126.23 ppm (s), 126.51 ppm (s), 127.18 ppm (s), 127.32 ppm (s), 130.36 ppm (s), 138.51 ppm (s), 138.65 ppm (s), 139.83 ppm (s), 148.01 ppm (s), 190.18 ppm (s, -NCN-).  $^{29}\text{Si}$  NMR (119 MHz, r.t.,  $\text{C}_6\text{D}_6$ ): -26.12 ppm (s), -2.00 ppm (s). Melting point: 170-175 °C (decomp.). Anal calcd for  $\text{C}_{83}\text{H}_{107}\text{N}_7\text{Ni}_5\text{Si}_4$ ; C 63.17, H 5.24, N 1.60; found: C 63.12, H 5.19, N 1.75.

**Synthesis of  $\text{Ni}_2$  cluster **3**.** In a 50 mL schlenk tube,  $\text{Ni}(\text{cod})_2$  (100.0 mg, 0.364 mmol) was dissolved in toluene (5 mL), then  $\text{CN}^t\text{Bu}$  (72.0  $\mu\text{L}$ , 0.636 mmol) was added to this solution slowly at room temperature. Then  $\text{Si}_4\text{Ph}_8$  suspended in toluene (2 mL) was added to the solution. The solution was stirred at 60 °C for 24 hrs, then  $\text{CN}^t\text{Bu}$  (30.8  $\mu\text{L}$ , 0.273 mmol) was added to the solution. The reaction mixture was then stirred at 60 °C for additional 24 hrs. The solvent was removed *in vacuo*, and the obtained solid was dissolved in pentane (5 mL). The solution was passed through the silica-gel column chromatography to remove the small amount of byproducts with low solubility by using pentane as eluent. Volatiles of the obtained orange-red solution was removed *in vacuo*, then remaining crude product was recrystallized from pentane at -20 °C twice to afford orange crystals in 15 % yield (34.1 mg, 0.0270 mmol).  $^1\text{H}$  NMR (400 MHz, r.t.,  $\text{C}_6\text{D}_6$ ):  $\delta$  = 0.39 ppm (s, 18H,  $\text{CMe}_3$ ), 0.88 ppm (s, 9H,  $\text{CMe}_3$ ), 1.34 ppm (s, 9H,  $\text{CMe}_3$ ), 1.59 ppm (s, 9H,  $\text{CMe}_3$ ), 7.05-7.09 ppm (m, 7H, Ph), 7.18-7.31 ppm (m, 17H, Ph), 7.69-7.71 ppm (m, 4H, Ph), 7.91-7.93 ppm (m, 4H, Ph), 7.98-8.00 ppm (m, 4H, Ph), 8.13-8.16 ppm (m, 4H, Ph).  $^{13}\text{C}$  NMR (100 MHz, r.t.,  $\text{C}_6\text{D}_6$ ): 29.38 ppm (s, - $\text{C}(\text{CH}_3)_3$ ), 29.66 ppm (s, - $\text{C}(\text{CH}_3)_3$ ), 29.96 ppm (s, - $\text{C}(\text{CH}_3)_3$ ), 36.22 ppm (s, - $\text{C}(\text{CH}_3)_3$ ), 52.80 ppm (s,  $\text{C}(\text{CH}_3)_3$ ), 54.77 ppm (s,  $\text{C}(\text{CH}_3)_3$ ), 55.69 ppm (s,  $\text{C}(\text{CH}_3)_3$ ), 60.88 ppm (s,  $\text{C}(\text{CH}_3)_3$ ), 125.93 ppm (s), 126.05 ppm (s), 126.37 ppm (s), 126.91 ppm (s), 127.35 ppm (s),

128.00 ppm (s), 128.24 ppm (s), 128.36 ppm (s), 128.67 ppm (s), 130.18 ppm (s), 135.61 ppm (s), 136.11 ppm (s), 137.27 ppm (s), 137.89 ppm (s), 138.29 ppm (s), 138.34 ppm (s), 143.34 ppm (s), 146.38 ppm (s), 146.80 ppm (s), 152.15 ppm (s), 155.48 ppm (s). <sup>29</sup>Si NMR (119 MHz, r.t., C<sub>6</sub>D<sub>6</sub>): -57.02 ppm (s), -6.80 ppm (s), -1.48 ppm (s). IR (ATR):  $\nu_{\text{CN}} = 2110.5, 2075 \text{ cm}^{-1}$ . Melting point: 140-143 °C (decomp.). Anal calcd for C<sub>73</sub>H<sub>85</sub>N<sub>5</sub>Ni<sub>2</sub>Si<sub>4</sub>; C 69.46, H 6.79, N 5.55; found: C 69.13, H 6.67, N 5.36.

**Synthesis of 1-tert-butyl-3-(1-tert-butyl-1-aza-vinylidene)-2,2,4,4-tetraphenyl-1-aza-2,4-disilacyclobutane (4).** In a 50 mL schlenk tube, Ni(cod)<sub>2</sub> (100.0 mg, 0.364 mmol) was dissolved in toluene (5 mL), then CN<sup>t</sup>Bu (72.0  $\mu$ L, 0.636 mmol) was added to this solution slowly at room temperature. Then Si<sub>4</sub>Ph<sub>8</sub> suspended in toluene (2 mL) was added to the solution. The solution was stirred at 60 °C for 24 hrs, then CN<sup>t</sup>Bu (30.8  $\mu$ L, 0.273 mmol) was added to the solution. The reaction mixture was then stirred at 60 °C for additional 24 hrs. The solvent was removed *in vacuo*. The obtained crude product was then dissolved in toluene, and was heated at 80 °C for 48h. The solvent was removed *in vacuo*, and the remaining solid was extracted with pentane (10 mL). The pentane solution was concentrated, and cooled at -20 °C, then colorless crystals of **4** were obtained (36.3 mg, 38%). <sup>1</sup>H NMR (400 MHz, r.t., C<sub>6</sub>D<sub>6</sub>):  $\delta = 0.88 \text{ ppm (s, 9H, CMe}_3\text{)}, 1.14 \text{ ppm (s, 9H, CMe}_3\text{)}, 7.22\text{-}7.29 \text{ ppm (m, 12H, Ph)}, 8.12\text{-}8.15 \text{ ppm (m, 8H, Ph)}$ . <sup>13</sup>C NMR (100 MHz, r.t., C<sub>6</sub>D<sub>6</sub>): 30.91 ppm (s, -C(CH<sub>3</sub>)<sub>3</sub>), 34.14 ppm (s, -C(CH<sub>3</sub>)<sub>3</sub>), 52.30 ppm (s, C(CH<sub>3</sub>)<sub>3</sub>), 54.77 ppm (s, C=C=NC(CH<sub>3</sub>)<sub>3</sub>), 57.20 ppm (s, C(CH<sub>3</sub>)<sub>3</sub>), 128.25 ppm (s, Ph), 130.18 ppm (s, Ph), 136.12 ppm (s, Ph), 137.79 ppm (s, Ph), 161.15 ppm (s, C=C=NC(CH<sub>3</sub>)<sub>3</sub>). <sup>29</sup>Si NMR (119 MHz, r.t., C<sub>6</sub>D<sub>6</sub>): -13.12 ppm (s). IR (ATR):  $\nu_{\text{CN}} = 2024 \text{ cm}^{-1}$ . Melting point: 190-195 °C (decomp.). Anal calcd for C<sub>34</sub>H<sub>38</sub>N<sub>2</sub>Si<sub>2</sub>; C 76.93, H 7.22, N 5.28; found: C 76.93, H 7.22, N 5.37.

**Synthesis of Ni<sub>5</sub> cluster 5.** In a 50 mL schlenk tube, Ni(cod)<sub>2</sub> (100.0 mg, 0.364 mmol) was dissolved in toluene (5 mL) and CN<sup>t</sup>Bu (57.6  $\mu$ L, 0.508 mmol) was added slowly to this solution. Then Si<sub>4</sub>Ph<sub>8</sub> (53.0 mg, 0.0728 mmol) suspended in toluene (5 mL) was added to this solution. The obtained reaction mixture was stirred at 60 °C for 48 hr. The solvent was removed *in vacuo*, and the obtained solid was dissolved in diethyl ether (0.5 mL). This solution was purified by the column chromatography by using the 1: 4 mixture of diethyl ether/pentane as eluent. Volatiles of the obtained solution was removed *in vacuo*, then remaining crude product was recrystallized from hexamethyldisiloxane (HMDSO) at -20 °C to afford dark red crystals of **3** in 22 % yield (26.1 mg, 0.0163 mmol). <sup>1</sup>H NMR (400 MHz, r.t., C<sub>6</sub>D<sub>6</sub>):  $\delta = 0.72 \text{ ppm (s, 9H, CMe}_3\text{)}, 0.77 \text{ ppm (s, 9H, CMe}_3\text{)}, 0.81 \text{ ppm (s, 9H, CMe}_3\text{)}, 0.87 \text{ ppm (s, 18H, CMe}_3\text{)}, 1.30 \text{ ppm (s, 9H, CMe}_3\text{)}, 1.78 \text{ ppm (s, 9H, CMe}_3\text{)}, 6.97\text{-}7.01 \text{ ppm (m, 3H, Ph)}, 7.07\text{-}7.12 \text{ ppm (m, 2H, Ph)}, 7.23\text{-}7.36 \text{ ppm (m, 13H, Ph)}, 7.41\text{-}7.46 \text{ ppm (m, 6H, Ph)}, 7.50\text{-}7.52 \text{ ppm (m, 2H, Ph)}, 7.55\text{-}7.58 \text{ ppm (m, 2H, Ph)}, 8.12\text{-}8.17 \text{ ppm (m, 8H, Ph)}, 8.54\text{-}8.56 \text{ ppm (m, 2H, Ph)}, 8.92\text{-}8.94 \text{ ppm (m, 2H, Ph)}$ . <sup>13</sup>C NMR (100 MHz, r.t., C<sub>6</sub>D<sub>6</sub>): 29.49 ppm (s, -C(CH<sub>3</sub>)<sub>3</sub>), 29.56 ppm (s, -C(CH<sub>3</sub>)<sub>3</sub>), 29.64 ppm (s, -C(CH<sub>3</sub>)<sub>3</sub>), 29.74 ppm (s, -C(CH<sub>3</sub>)<sub>3</sub>), 30.08 ppm (s, -C(CH<sub>3</sub>)<sub>3</sub>), 32.04 ppm (s, -C(CH<sub>3</sub>)<sub>3</sub>), 36.34 ppm (s, -C(CH<sub>3</sub>)<sub>3</sub>), 55.34 ppm (s, -C(CH<sub>3</sub>)<sub>3</sub>), 55.50 ppm (s, -C(CH<sub>3</sub>)<sub>3</sub>), 55.93 ppm (s, -C(CH<sub>3</sub>)<sub>3</sub>), 57.49 ppm (s, -C(CH<sub>3</sub>)<sub>3</sub>), 60.65 ppm (s, -C(CH<sub>3</sub>)<sub>3</sub>), 61.96 ppm (s, -C(CH<sub>3</sub>)<sub>3</sub>), 124.66 ppm (s), 126.30 ppm (s), 126.34 ppm (s), 126.43 ppm (s), 126.50 ppm (s), 126.58 ppm (s), 127.06 ppm (s), 127.08 ppm (s), 127.20 ppm (s), 127.30 ppm (s), 132.99 ppm (s), 135.14 ppm (s), 135.26 ppm (s), 135.84 ppm (s), 137.24 ppm (s), 138.13 ppm (s), 138.38 ppm (s), 138.89 ppm (s), 139.90 ppm (s), 140.16 ppm (s), 141.63 ppm (s), 142.32

ppm (s), 144.28 ppm (s), 144.42 ppm (s), 147.58 ppm (s), 149.01 ppm (s), 150.05 ppm (s), 151.26 ppm (s), 153.04 ppm (s), 154.45 ppm (s), 158.83 ppm (s), 173.94 ppm (s) (one peak assignable to the  $\underline{\text{C}}\text{N}^t\text{Bu}$  moiety was not detected).  $^{29}\text{Si}$  NMR (119 MHz, r.t.,  $\text{C}_6\text{D}_6$ ): -59.26 ppm (s), -36.68 ppm (s), 0.43 ppm (s), 137.93 ppm (s). IR (ATR):  $\nu_{\text{CN}} = 2071, 2102 \text{ cm}^{-1}$ . Melting point: 148-152 °C (decomp.). Anal calcd for  $\text{C}_{83}\text{H}_{107}\text{N}_7\text{Ni}_5\text{Si}_4$ ; C 62.13, H 6.47, N 6.11; found: C 62.12, H 6.68, N 6.09.

Figure S1-1.  $^1\text{H}$  NMR spectrum of solution of **2** in  $\text{C}_6\text{D}_6$  at room temperature.

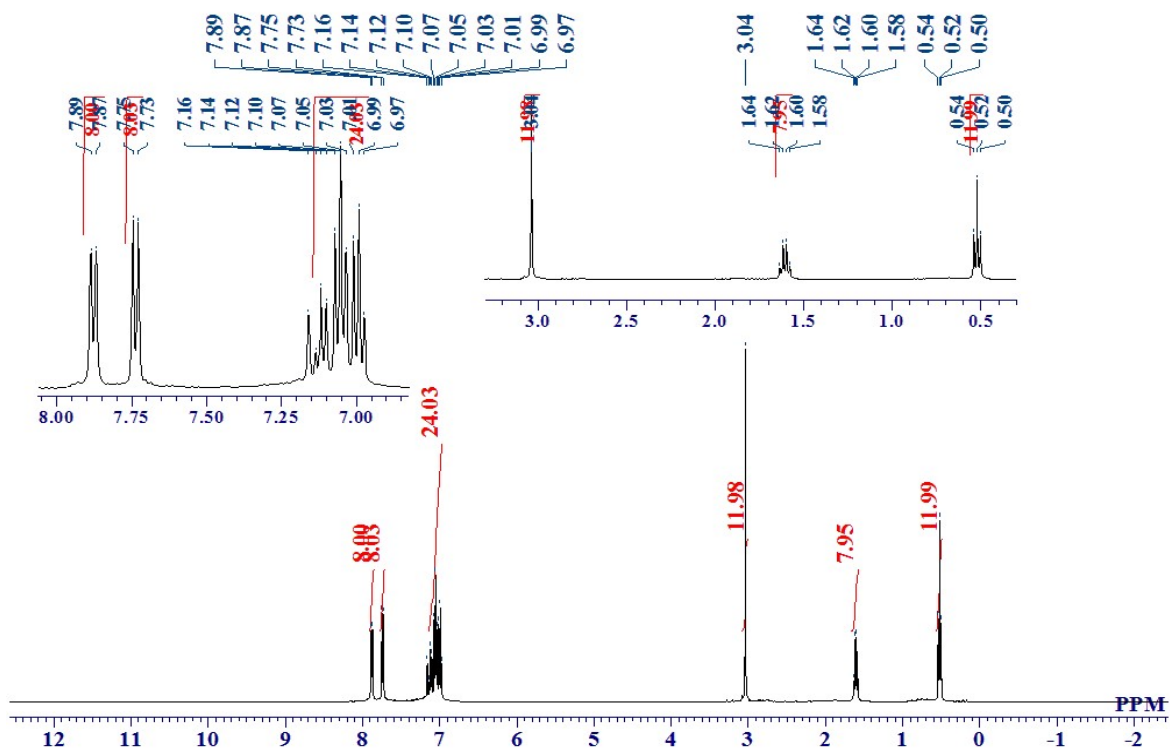

Figure S1-2.  $^{13}\text{C}$  NMR spectrum of solution of **2** in  $\text{C}_6\text{D}_6$  at room temperature.

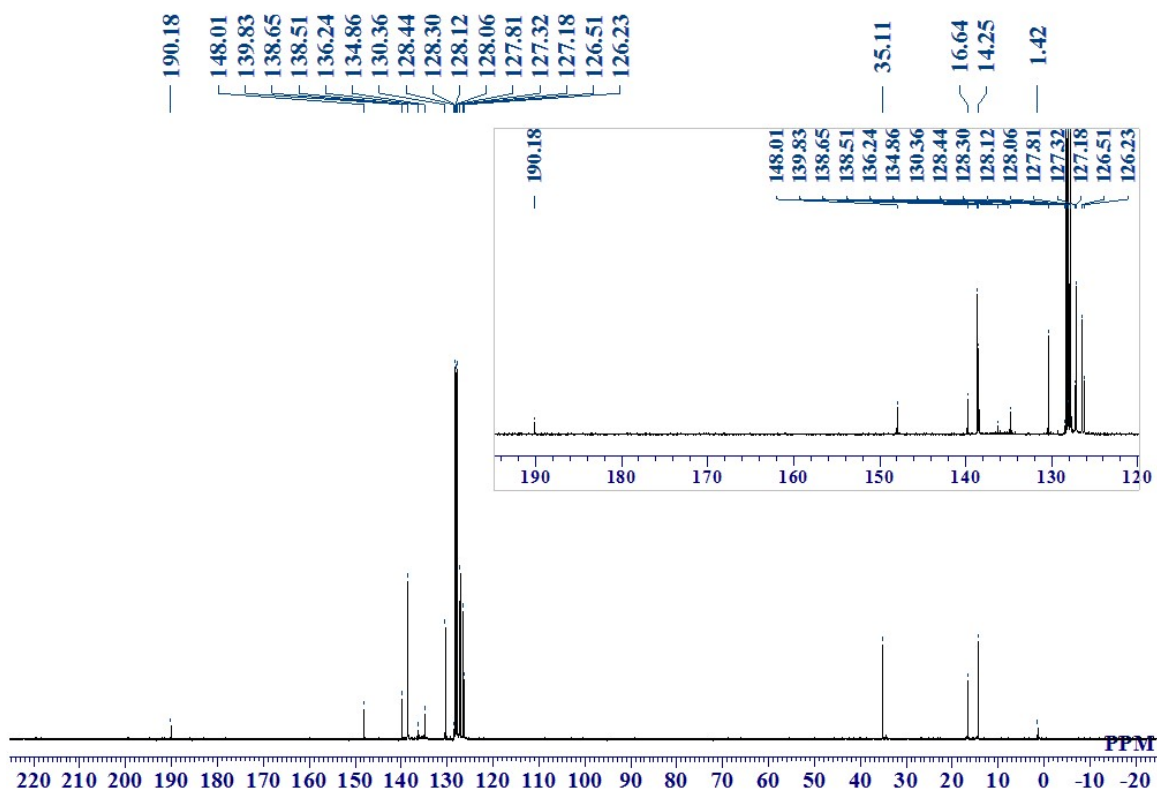

**Figure S1-3.**  $^{29}\text{Si}$  NMR spectrum of solution of **2** in  $\text{C}_6\text{D}_6$  at room temperature

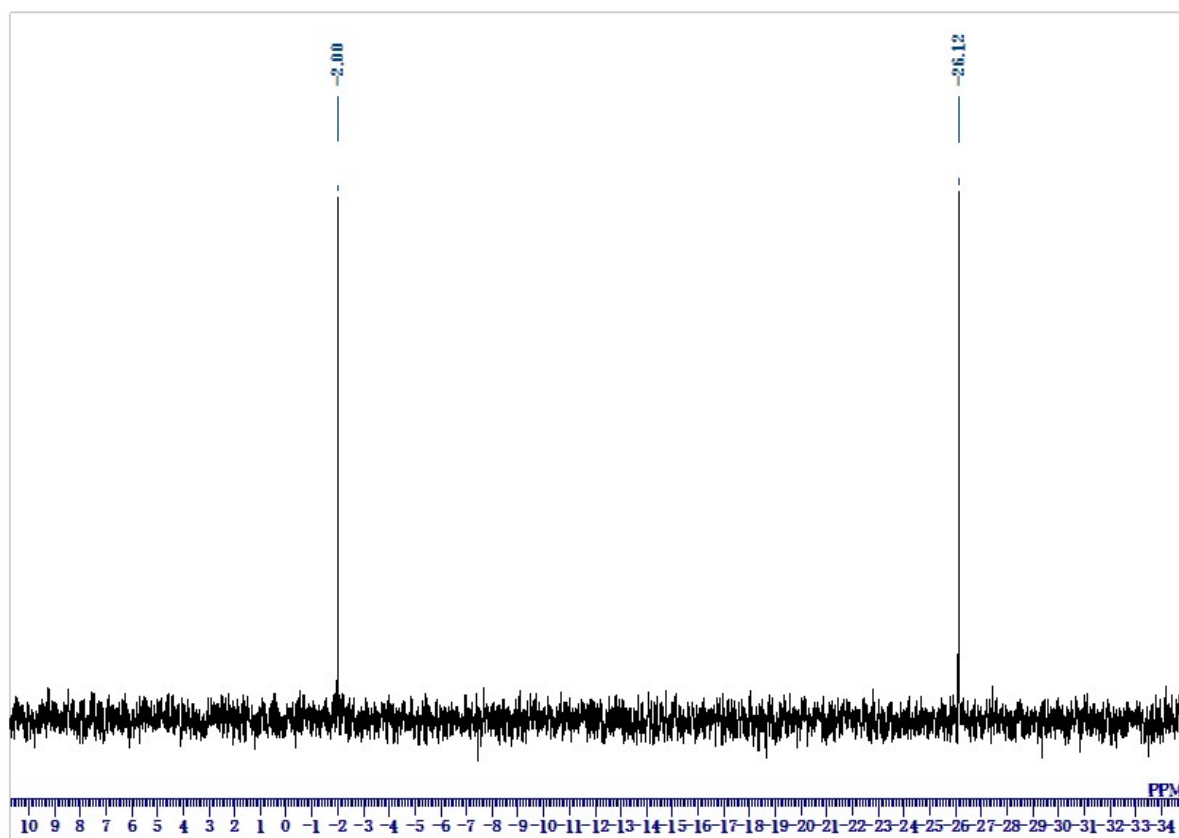

Figure S2-1. <sup>1</sup>H NMR spectrum of solution of **3** in C<sub>6</sub>D<sub>6</sub> at room temperature.

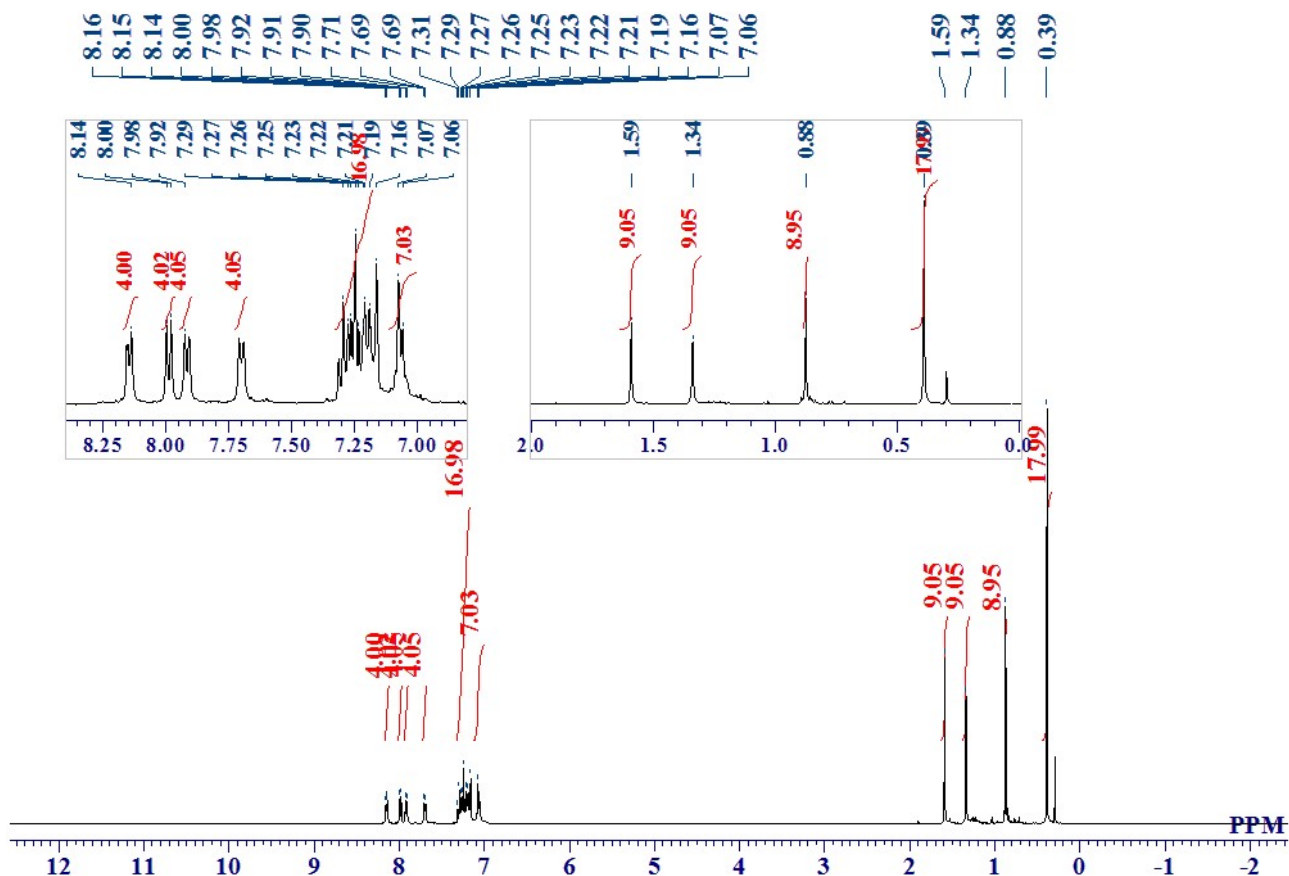

Figure S2-2. <sup>13</sup>C NMR spectrum of solution of **3** in C<sub>6</sub>D<sub>6</sub> at room temperature.

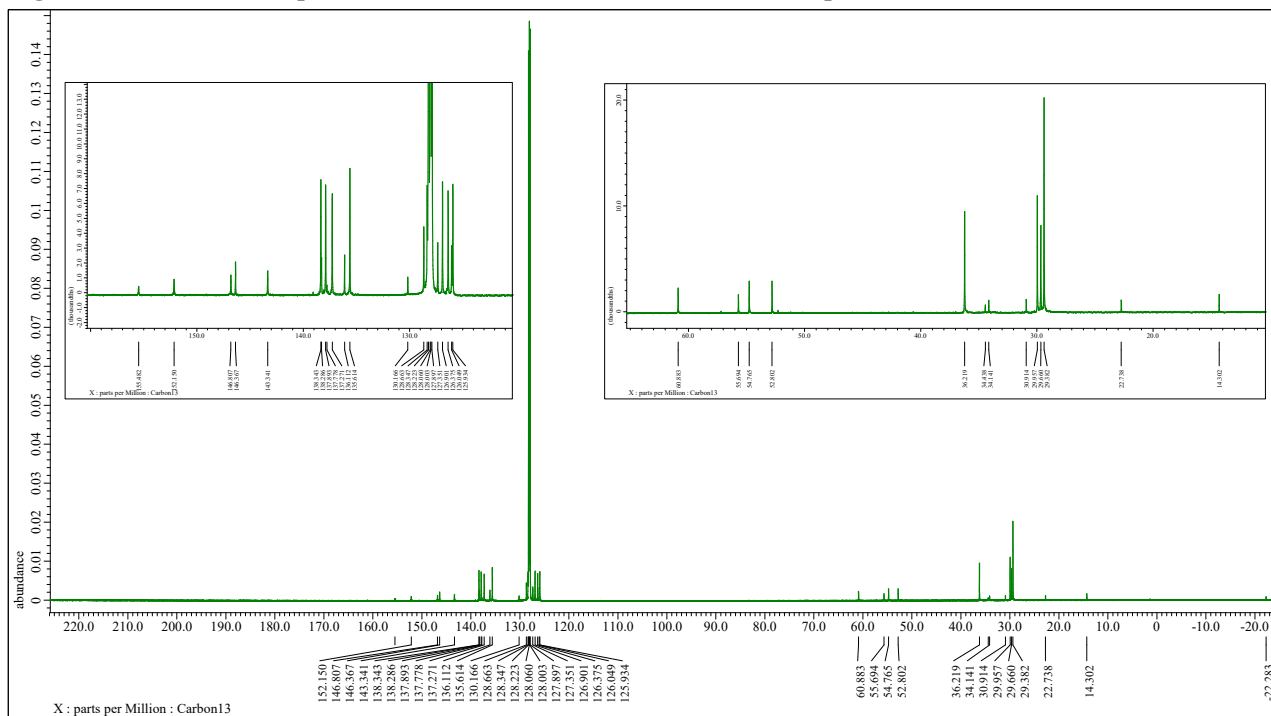

**Figure S2-3.**  $^{13}\text{C}$  and DEPT-135 NMR spectrum of solution of **3** in  $\text{C}_6\text{D}_6$  at room temperature.

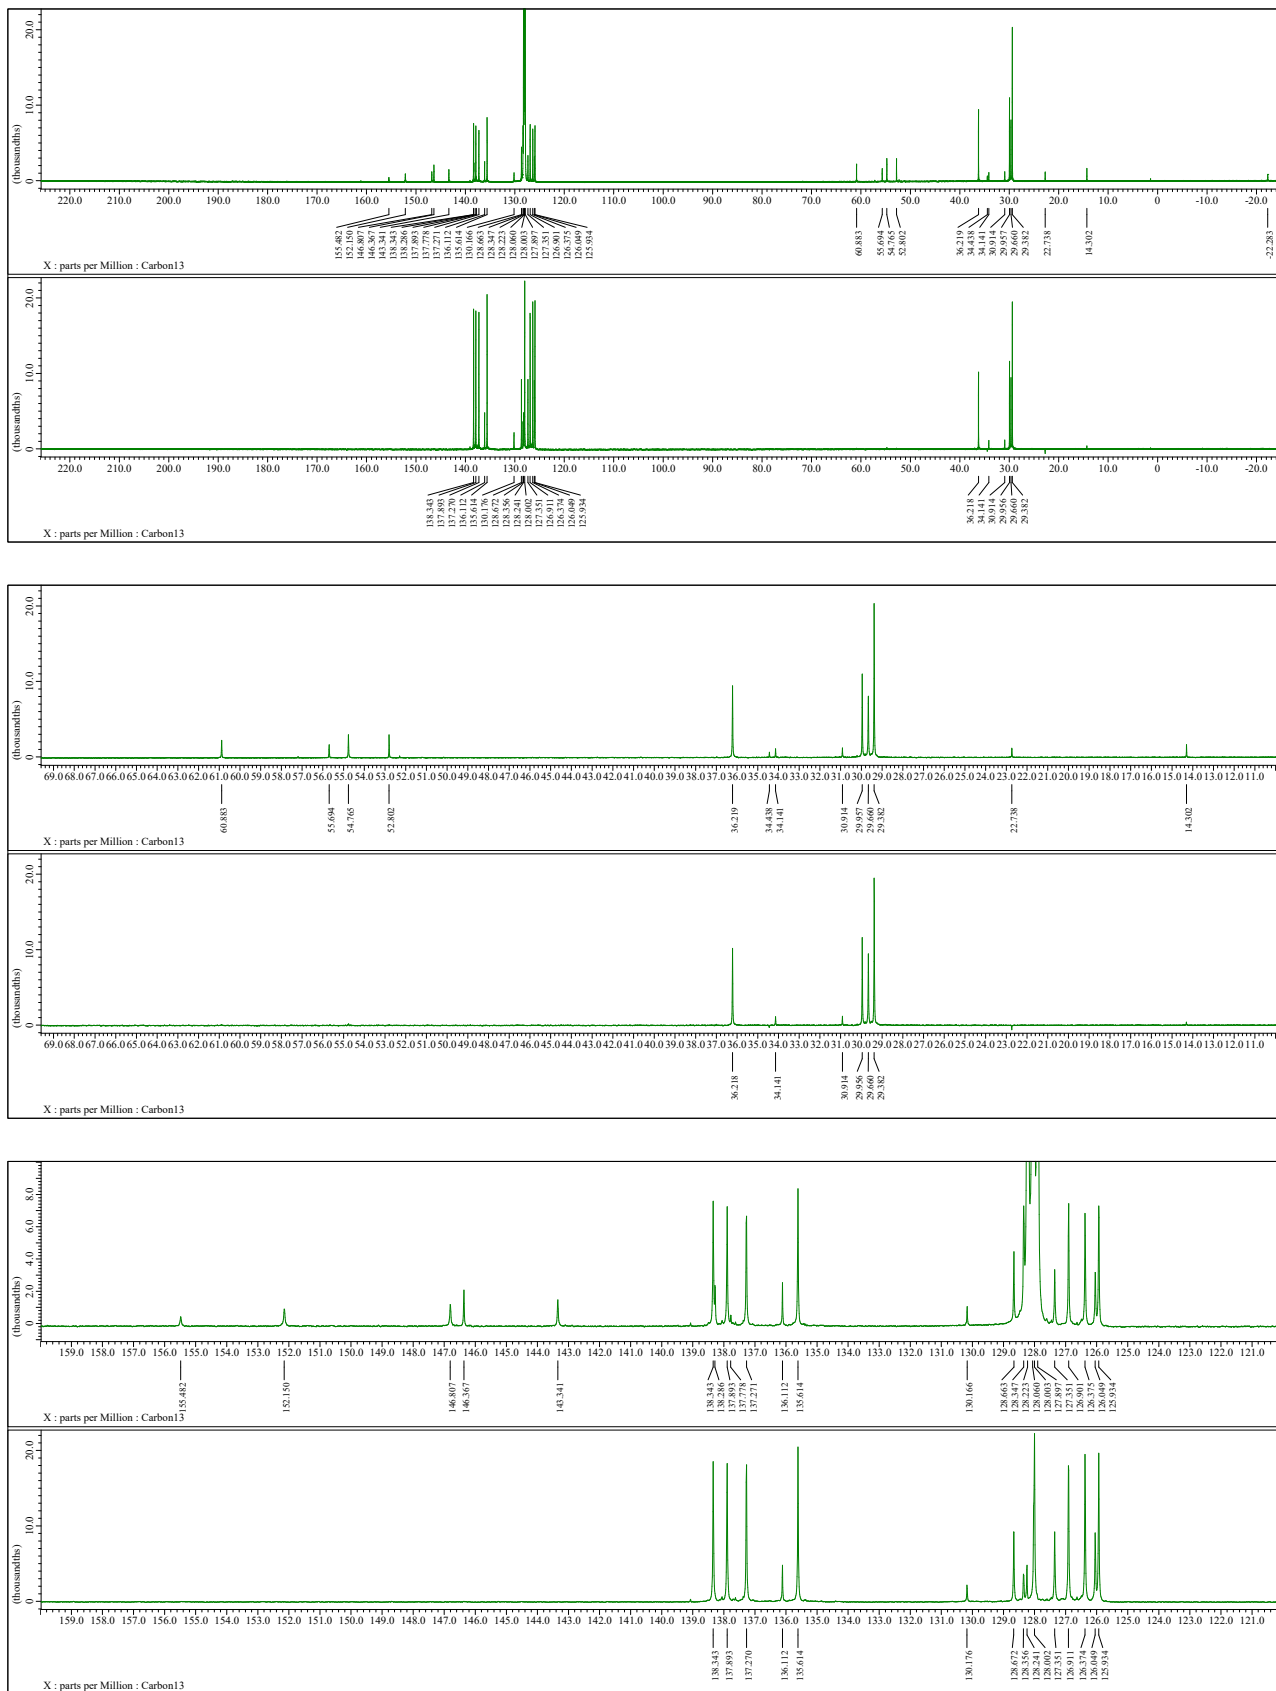



**Figure S2-4.**  $^{29}\text{Si}$  NMR spectrum of solution of **3** in  $\text{C}_6\text{D}_6$  at room temperature

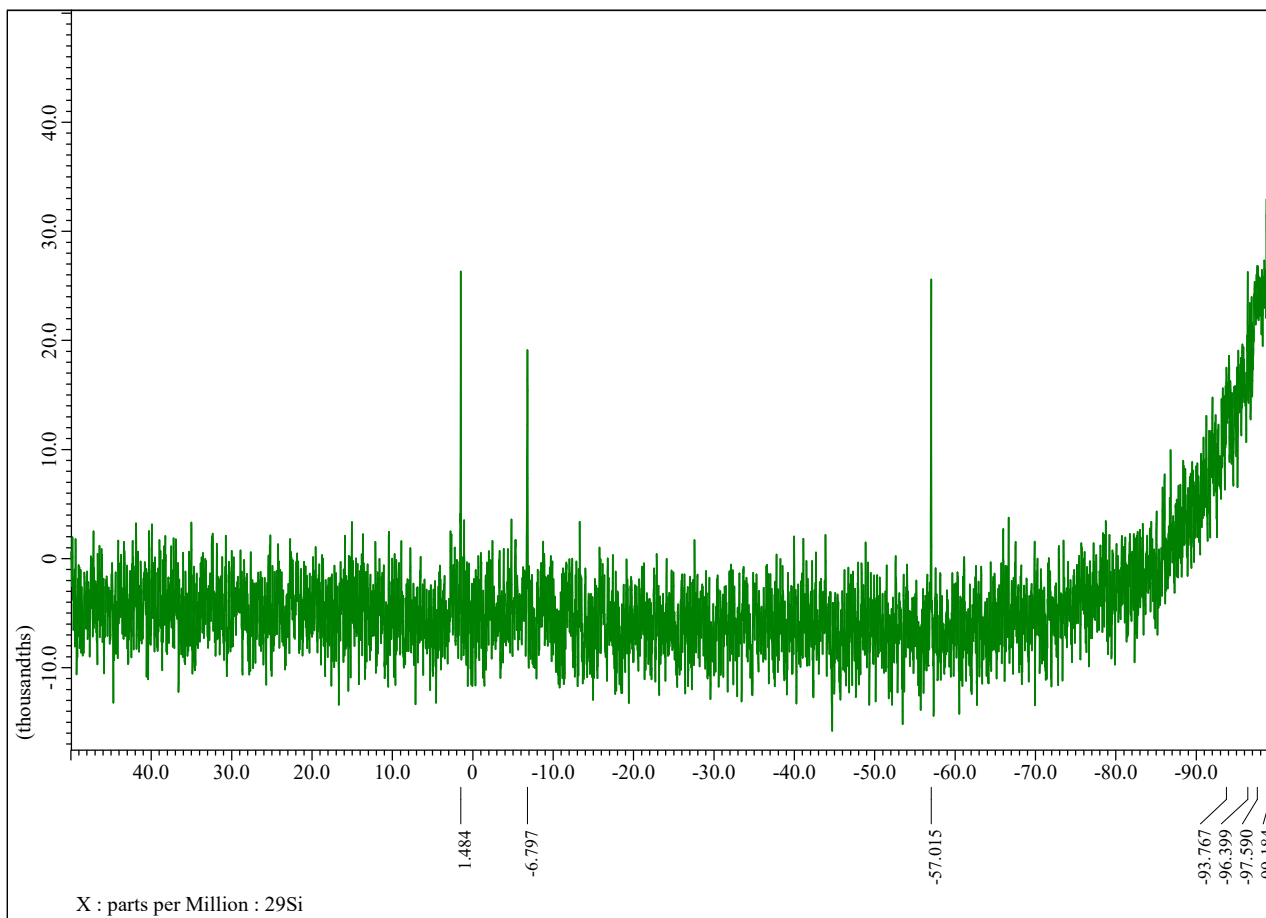

Figure S2-5. ATR-IR spectrum of **3** in the solid state

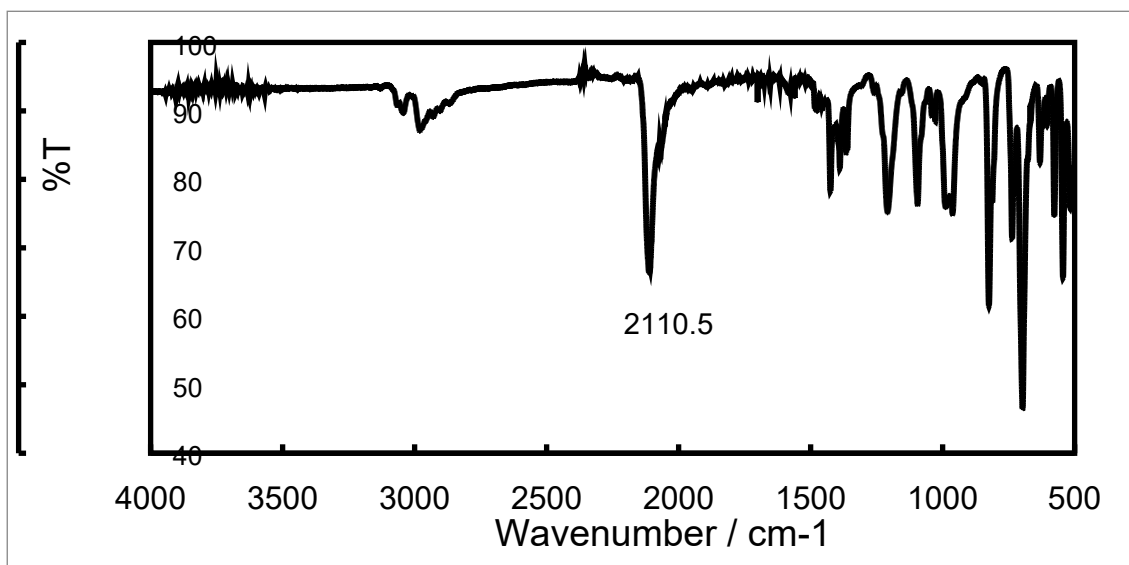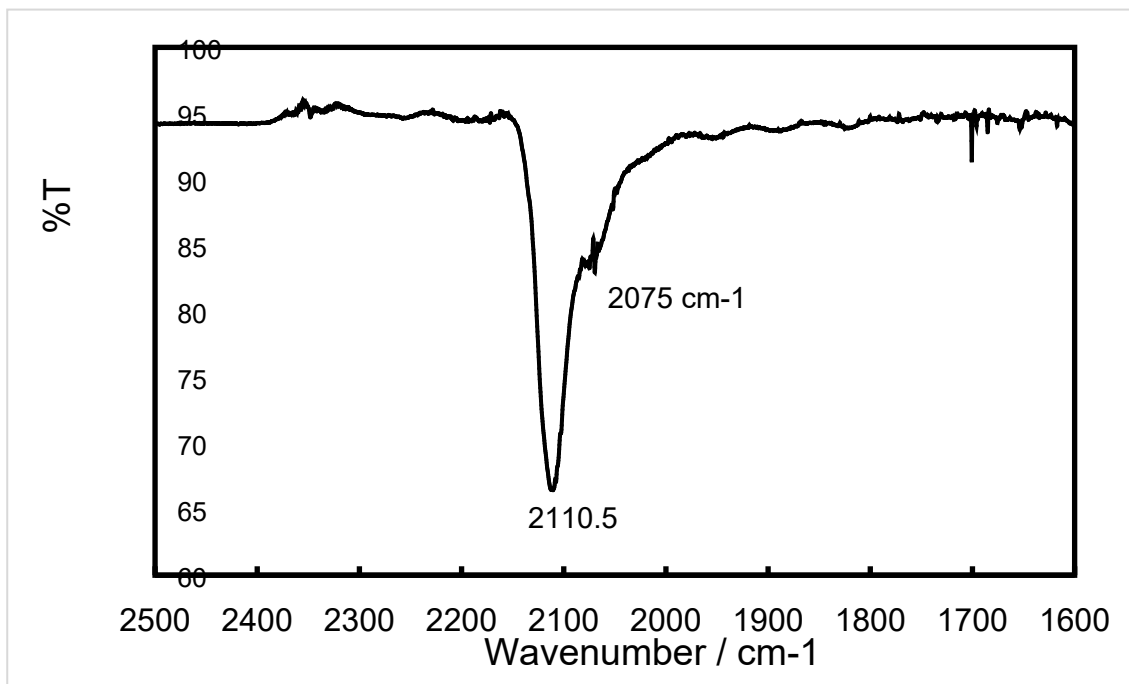

Figure S3-1.  $^1\text{H}$  NMR spectrum of solution of **4** in  $\text{C}_6\text{D}_6$  at room temperature.

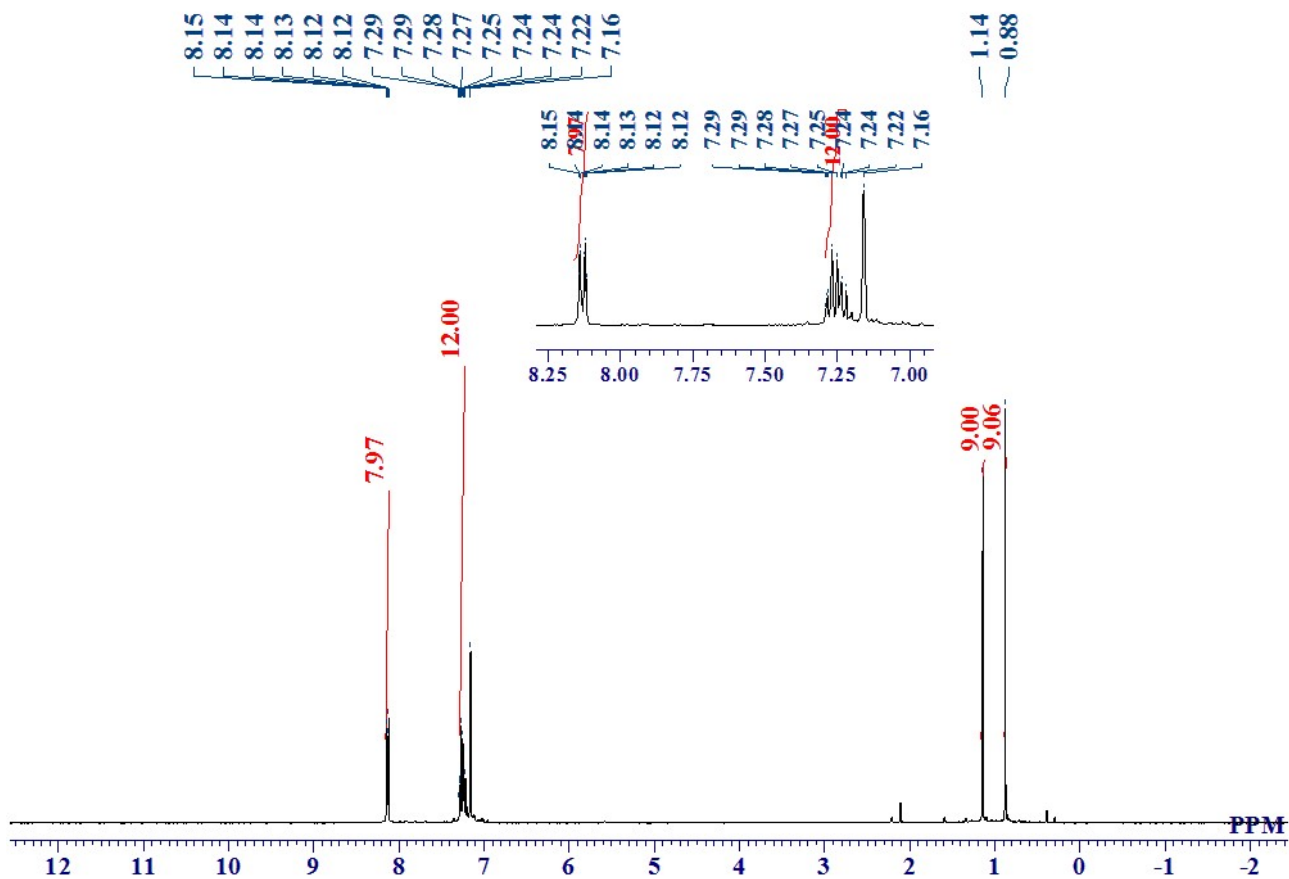

Figure S3-2.  $^{13}\text{C}$  NMR spectrum of solution of **4** in  $\text{C}_6\text{D}_6$  at room temperature.

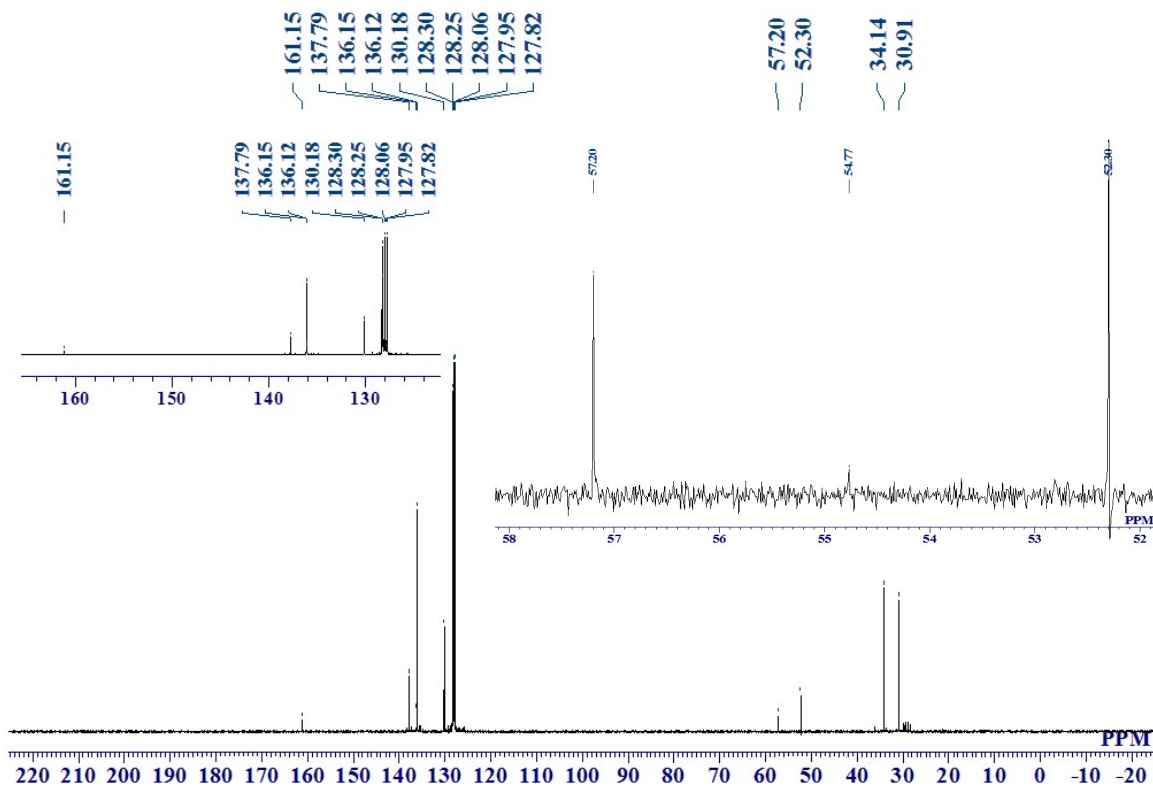

**Figure S3-3.**  $^{29}\text{Si}$  NMR spectrum of solution of **4** in  $\text{C}_6\text{D}_6$  at room temperature

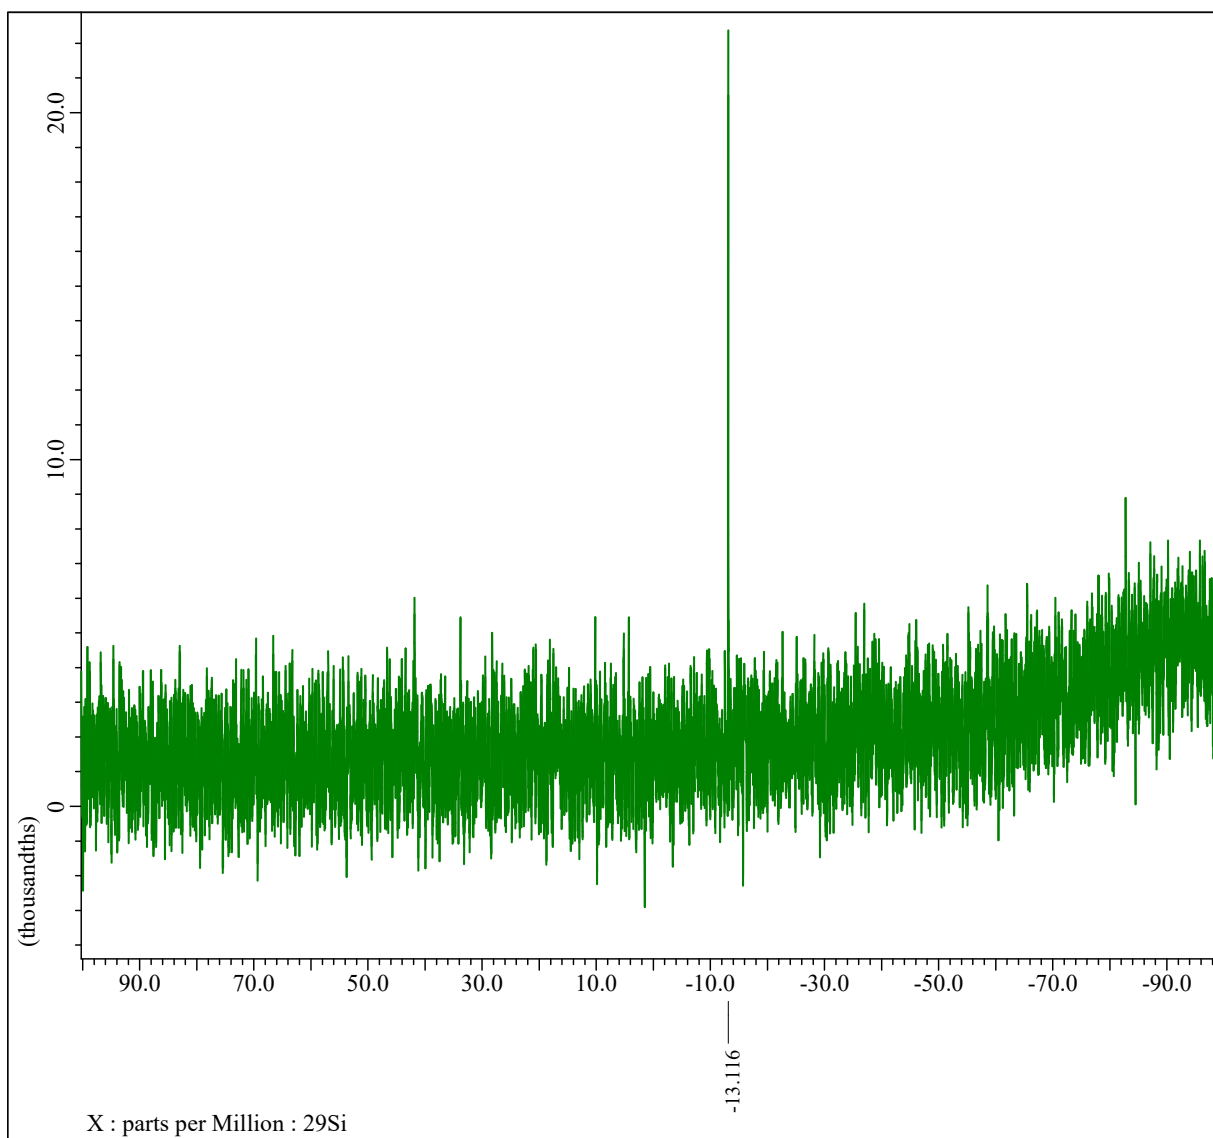

Figure S3-4. ATR-IR spectrum of 4 in the solid state

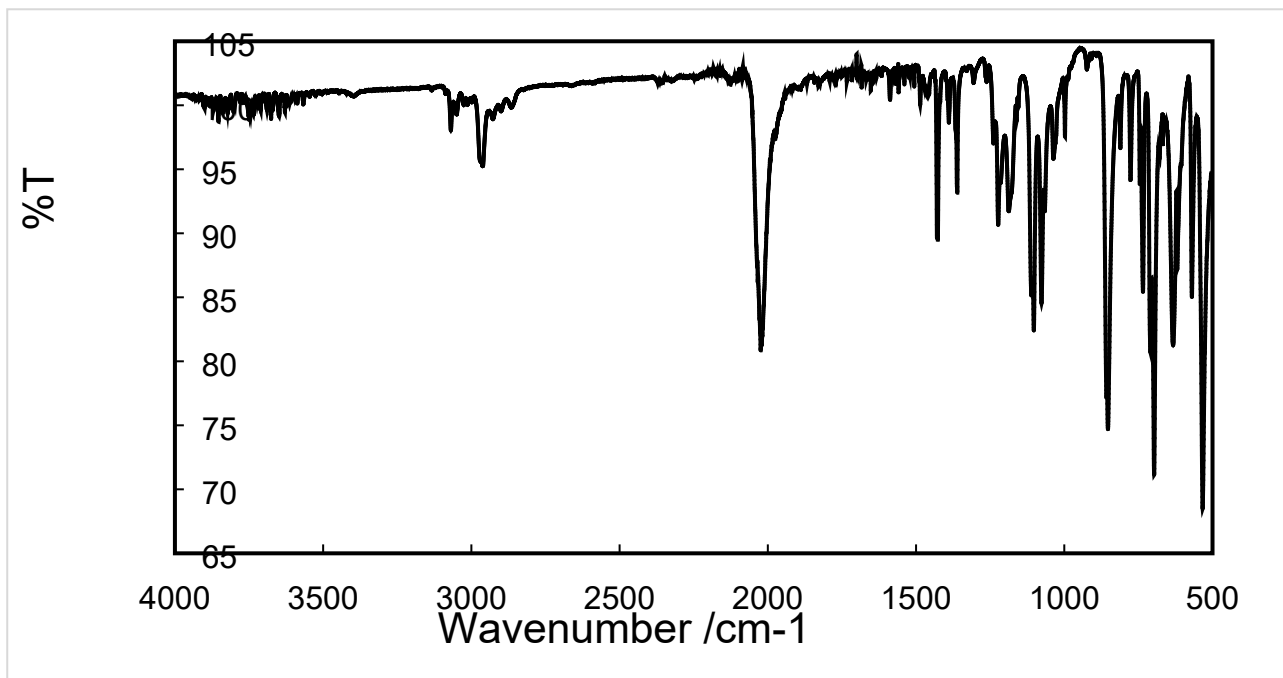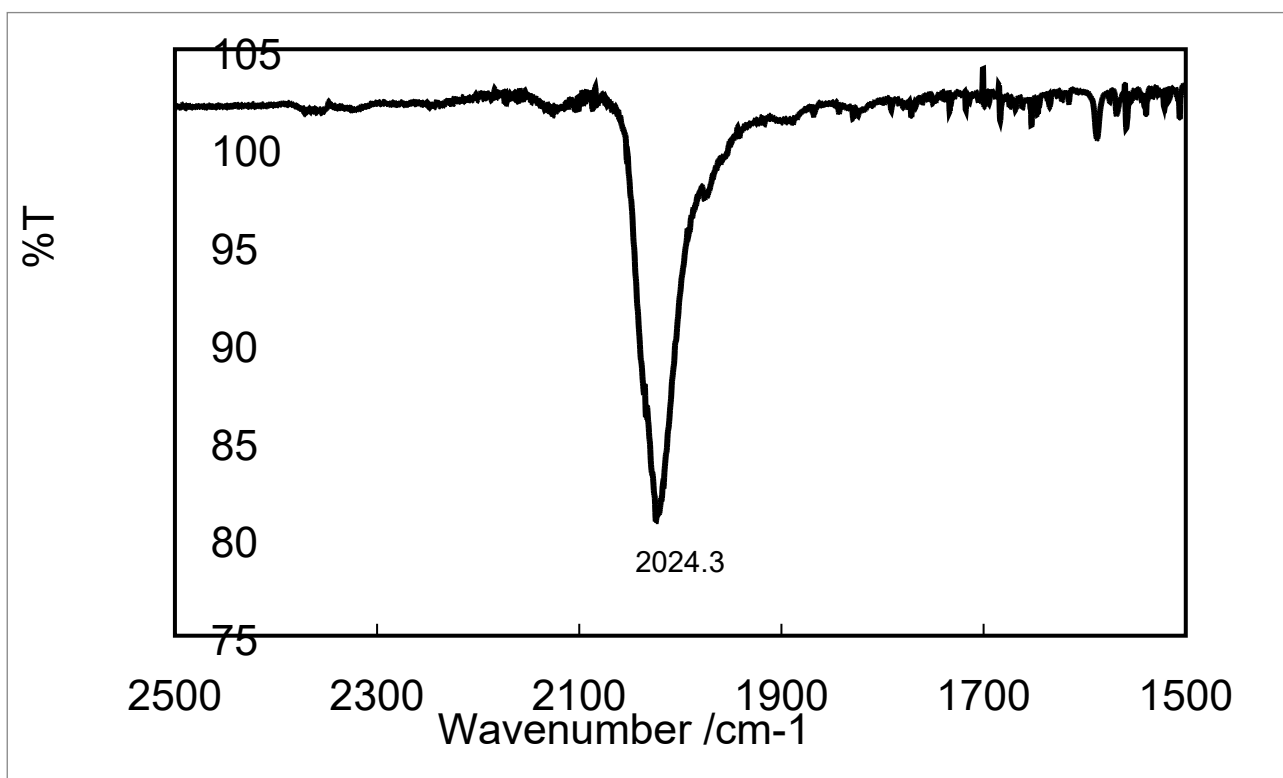

Figure S4-1. <sup>1</sup>H NMR spectrum of solution of 5 in C<sub>6</sub>D<sub>6</sub> at room temperature.

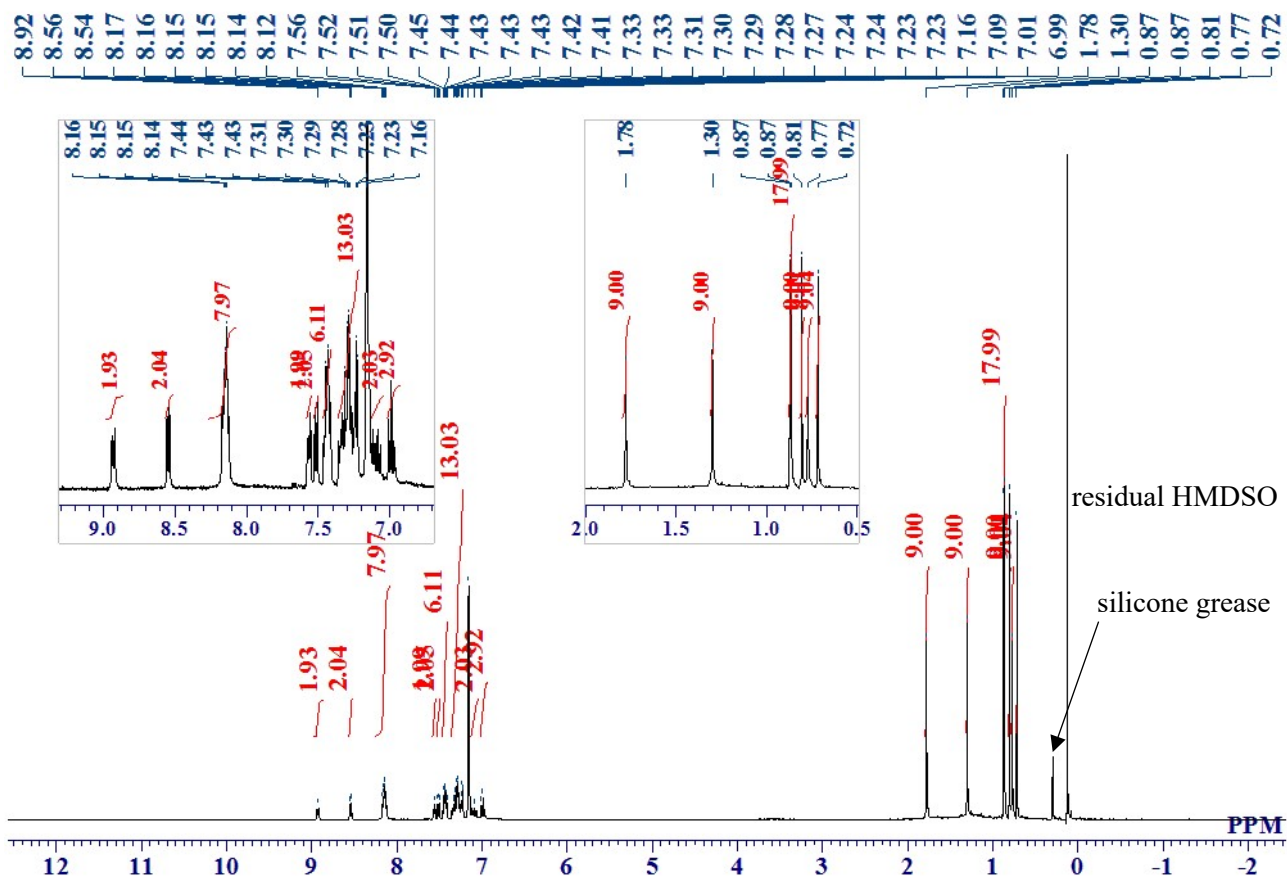

Figure S4-2. <sup>13</sup>C NMR spectrum of solution of 5 in C<sub>6</sub>D<sub>6</sub> at room temperature.

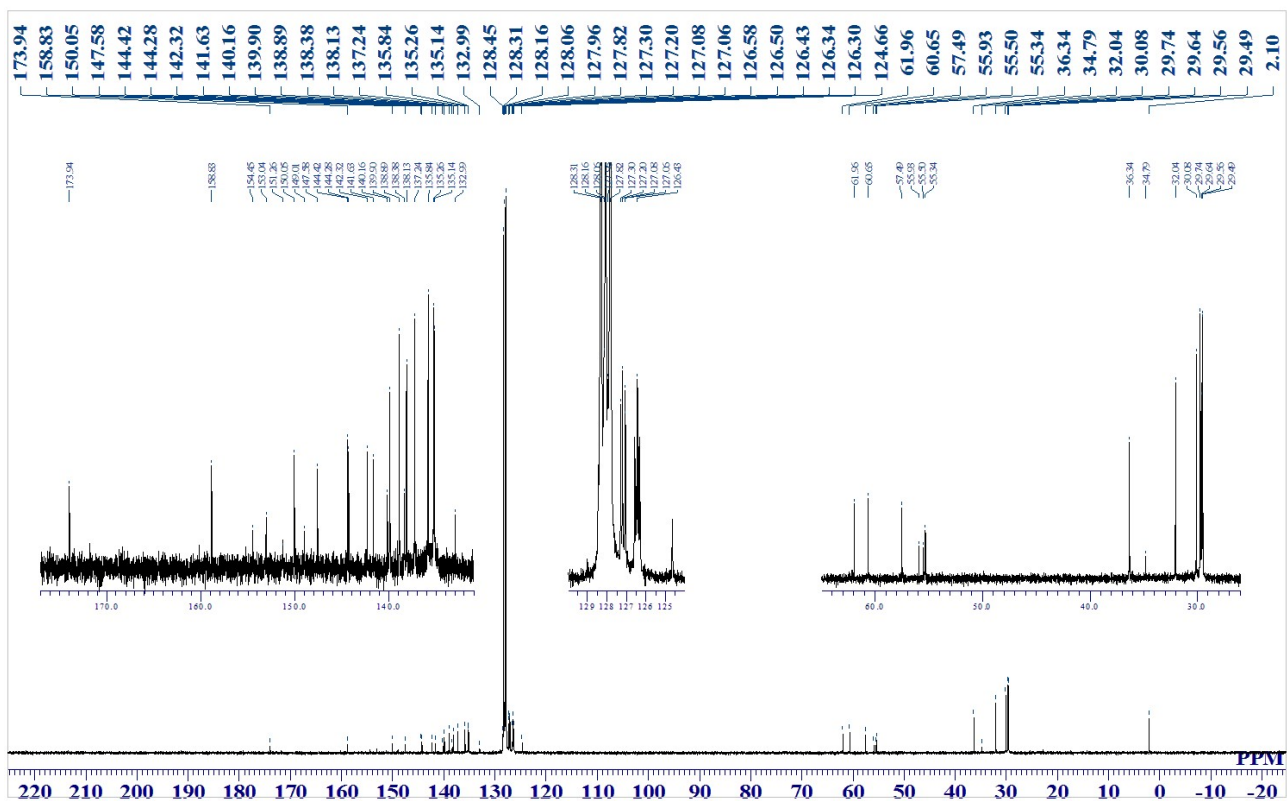

**Figure S4-3.**  $^{29}\text{Si}$  NMR spectrum of solution of **5** in  $\text{C}_6\text{D}_6$  at room temperature.

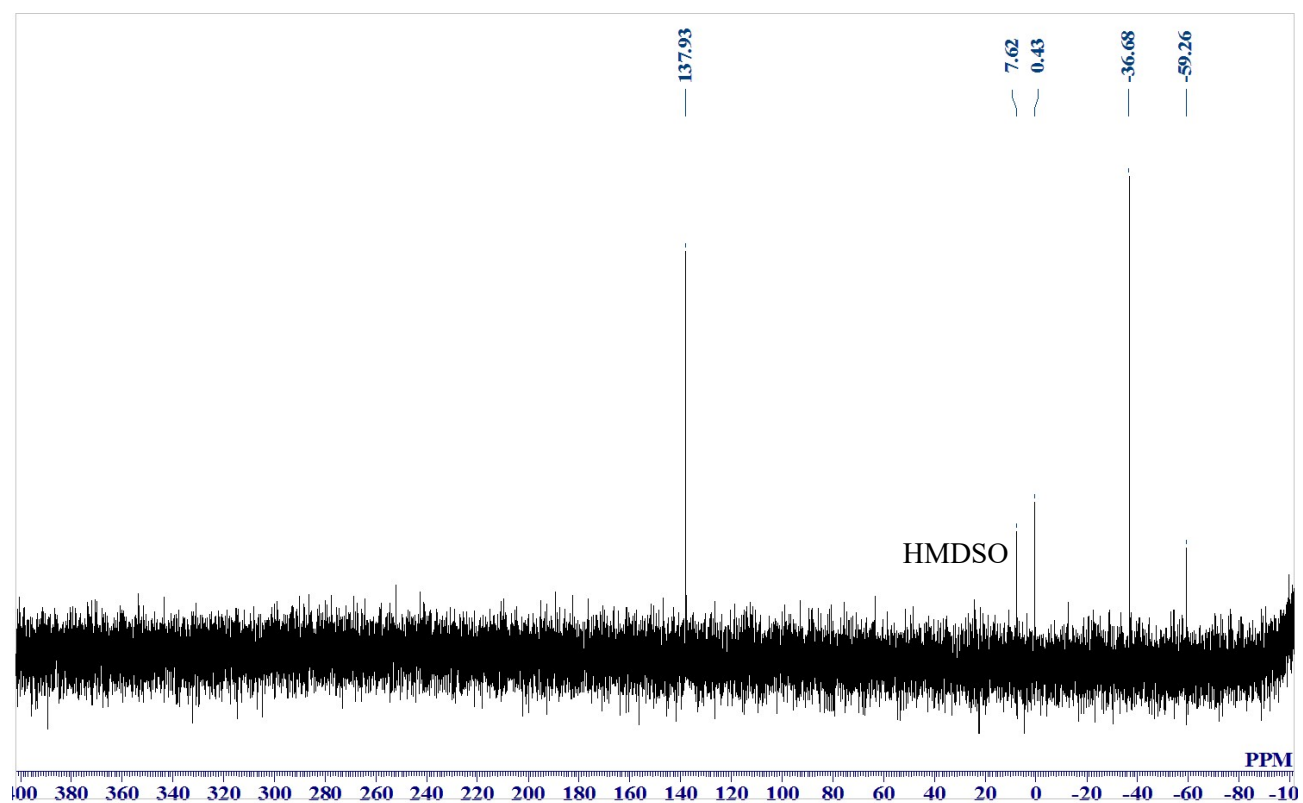

**Figure S4-4.** ATR-IR spectrum **5** in the solid state.

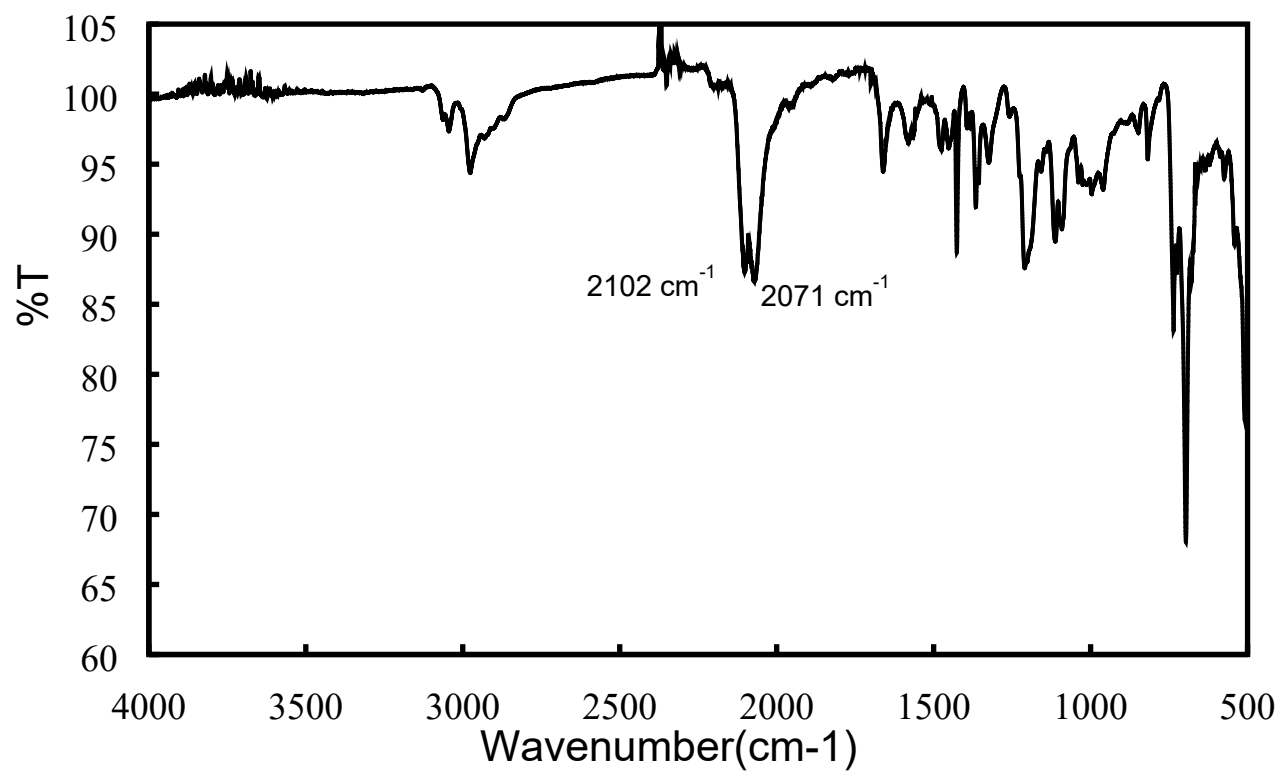



## Computational Details

All of the calculations were performed using the Gaussian 16 program.<sup>4</sup> Geometry optimization for cluster **3** and **5** was carried out by using the DFT method with the M06<sup>5</sup> functional, and the selected bond distances and the WBIs for cluster **3** (actual cluster **3** and optimized **3**<sub>opt</sub>) and **5** (actual cluster **5** and optimized **5**<sub>opt</sub>) were summarized in Table S1 and S2. The optimized molecular structures for **3**<sub>opt</sub> and **5**<sub>opt</sub> were depicted in Figure S5 and S6. Natural Bond Orbital (NBO) analyses were performed using the NBO 3.1 program implemented in Gaussian 16. The effective core potentials and the basis set by the Stuttgart–Dresden–Bonn group<sup>6</sup> and were used for Ni and the 6-31G\*\* basis sets<sup>7-11</sup> were used for C, N, Si and hydrogen atoms.

**Table S1.** Actual bond distances, calculated bond distances and Wiberg bond index for **3** and **3**<sub>opt</sub>.

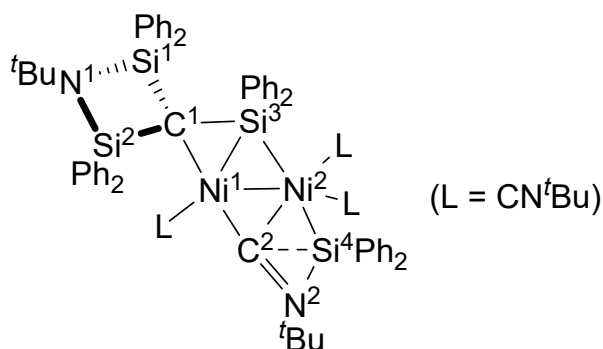

|             | Bond distance<br>determined by XRD (Å) | Bond distances<br>estimated by DFT (Å) | Wiberg bonx index |
|-------------|----------------------------------------|----------------------------------------|-------------------|
| Ni(1)-Ni(2) | 2.4229(18)                             | 2.47751                                | 0.2542            |
| Ni(1)-Si(3) | 2.3888(17)                             | 2.42010                                | 0.2565            |
| Ni(1)-C(1)  | 2.029(3)                               | 2.02865                                | 0.3292            |
| Ni(1)-C(2)  | 1.781(3)                               | 1.80202                                | 0.6377            |
| Ni(2)-Si(3) | 2.4042(18)                             | 2.41843                                | 0.2565            |
| Ni(2)-Si(4) | 2.2129(18)                             | 2.23813                                | 0.5413            |
| Ni(2)-C(2)  | 1.840(3)                               | 1.88956                                | 0.7817            |
| Si(1)-Si(2) | 2.492(2)                               | 2.54960                                | 0.0475            |
| Si(1)-C(1)  | 1.817(3)                               | 1.84523                                | 0.6991            |
| Si(2)-C(1)  | 1.824(3)                               | 1.85778                                | 0.7008            |
| Si(3)-C(1)  | 1.803(3)                               | 1.82679                                | 0.7903            |
| Si(4)-C(2)  | 2.091(3)                               | 2.11914                                | 0.3118            |
| Si(4)-N(2)  | 1.743(3)                               | 1.79634                                | 0.4562            |
| C(2)-N(2)   | 1.311(4)                               | 1.31566                                | 1.4936            |

**Figure S5.** Optimized molecular structure of **3** (**3<sub>opt</sub>**) with M06 functional. The medium slate blue balls are nickel atoms, the blue balls are silicon atoms, the pale blue balls are nitrogen atoms, the grey ones are carbon atoms.

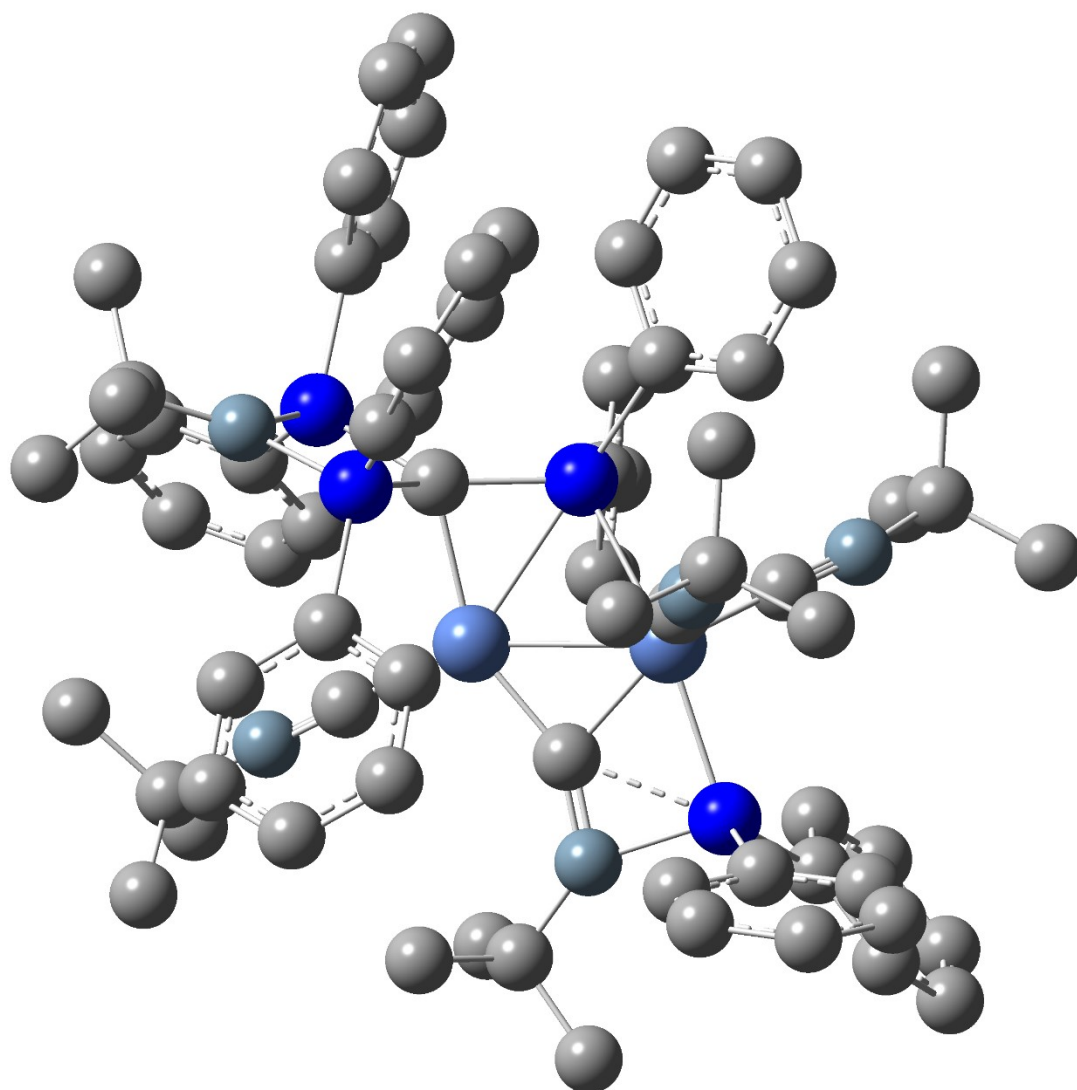

**Table S2.** Actual bond distances, calculated bond distances and Wiberg bond index for **5<sub>opt</sub>**.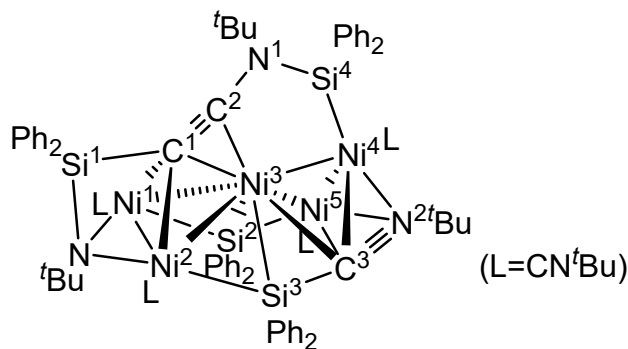

|             | Bond distance<br>determined by XRD (Å) | Bond distances<br>estimated by DFT (Å) | Wiberg bond index |
|-------------|----------------------------------------|----------------------------------------|-------------------|
| Ni(1)-Ni(2) | 2.5288(7)                              | 2.52703                                | 0.1292            |
| Ni(1)-Ni(3) | 2.5447(7)                              | 2.56679                                | 0.1455            |
| Ni(2)-Ni(3) | 2.5629(7)                              | 2.59056                                | 0.1539            |
| Ni(3)-Ni(4) | 2.4564(8)                              | 2.47365                                | 0.1612            |
| Ni(3)-Ni(5) | 2.4826(5)                              | 2.50650                                | 0.1623            |
| Ni(4)-Ni(5) | 2.6564(6)                              | 2.66237                                | 0.1129            |
| Si(1)-C(1)  | 1.847(3)                               | 1.85631                                | 0.6328            |
| Si(2)-Ni(1) | 2.2434(10)                             | 2.29155                                | 0.5041            |
| Si(2)-Ni(3) | 2.6082(8)                              | 2.51537                                | 0.3637            |
| Si(2)-Ni(5) | 2.2507(9)                              | 2.26403                                | 0.4550            |
| Si(3)-Ni(2) | 2.2841(11)                             | 2.29155                                | 0.4965            |
| Si(3)-Ni(3) | 2.4875(12)                             | 2.51537                                | 0.3637            |
| Si(4)-Ni(4) | 2.1871(8)                              | 2.21152                                | 0.4961            |
| C(1)-C(2)   | 1.304(5)                               | 1.3778                                 | 1.7324            |
| Ni(3)-C(1)  | 2.038(3)                               | 2.03563                                | 0.3350            |
| Ni(3)-C(2)  | 1.887(2)                               | 1.87531                                | 0.4551            |
| Ni(1)-C(1)  | 2.366(3)                               | 2.35945                                | 0.1431            |
| Ni(2)-C(1)  | 2.119(4)                               | 2.09279                                | 0.2694            |
| C(2)-N(1)   | 1.340(4)                               | 1.33253                                | 1.2663            |
| C(3)-N(2)   | 1.341(4)                               | 1.33630                                | 1.3918            |
| Ni(3)-C(3)  | 1.923(3)                               | 1.93970                                | 0.4242            |
| Ni(4)-C(3)  | 2.025(4)                               | 1.98453                                | 0.3619            |
| Ni(5)-C(3)  | 1.994(3)                               | 1.98176                                | 0.3651            |
| Ni(4)-N(2)  | 1.911(3)                               | 1.92177                                | 0.2673            |
| Ni(5)-N(2)  | 1.919(3)                               | 1.91990                                | 0.2651            |

**Figure S6.** Optimized molecular structure of **5** (**5<sub>opt</sub>**) with M06 functional. The medium slate blue balls are nickel atoms, the blue balls are silicon atoms, the pale blue balls are nitrogen atoms, the grey ones are carbon atoms.

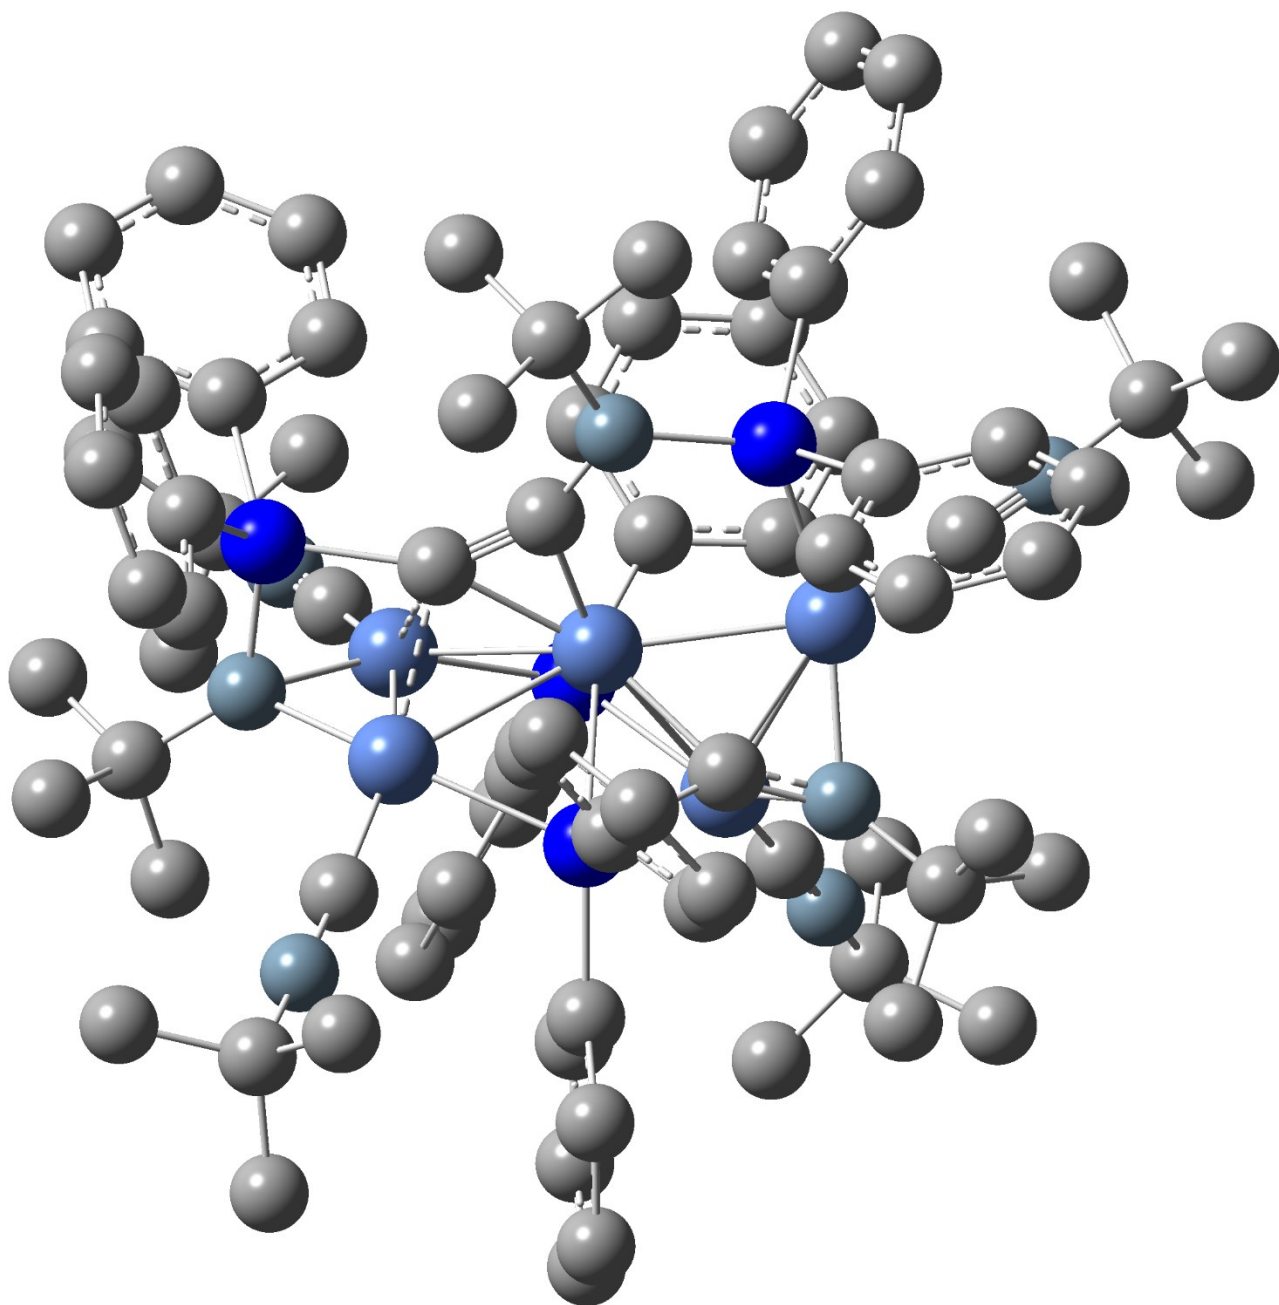

**Table S3.** The DFT-optimized Geometry for complex **3<sub>opt</sub>** and **5<sub>opt</sub>** (in XYZ format).**Cluster 3<sub>opt</sub>**

|    |           |           |           |   |           |           |           |
|----|-----------|-----------|-----------|---|-----------|-----------|-----------|
| Ni | -0.104699 | 1.064899  | -0.226100 | C | -1.483100 | 0.034900  | 5.138999  |
| Ni | 1.837199  | -0.369800 | 0.329600  | C | -0.905500 | 1.286199  | 5.328099  |
| Si | -3.429700 | 0.189899  | 0.270999  | C | -0.136600 | 1.842300  | 4.308000  |
| Si | -2.059100 | -0.539000 | -1.751500 | C | 0.027799  | 1.154299  | 3.109599  |
| Si | -0.373300 | -0.907500 | 1.150299  | C | -0.413800 | -2.801500 | 1.416899  |
| Si | 3.700100  | 0.816600  | -0.032399 | C | 0.627000  | -3.691799 | 1.127200  |
| N  | -3.714900 | 0.014700  | -1.464599 | C | 0.496300  | -5.063900 | 1.332100  |
| N  | -1.437399 | 3.676599  | -0.816900 | C | -0.683900 | -5.587299 | 1.849500  |
| N  | 2.693000  | 2.189900  | -0.603900 | C | -1.734200 | -4.725399 | 2.152300  |
| N  | 2.622700  | -1.506800 | 2.993700  | C | -1.596000 | -3.357799 | 1.933900  |
| N  | 2.224300  | -2.464699 | -1.870100 | C | 4.710299  | 1.429200  | 1.431700  |
| C  | -4.345000 | -1.104699 | 1.318000  | C | 4.072999  | 1.643799  | 2.663100  |
| C  | -4.566799 | -0.879999 | 2.684400  | C | 4.765800  | 2.164700  | 3.750999  |
| C  | -5.084300 | -1.874500 | 3.511199  | C | 6.119999  | 2.468300  | 3.633399  |
| C  | -5.412200 | -3.119000 | 2.982099  | C | 6.770500  | 2.264200  | 2.420800  |
| C  | -5.215999 | -3.362399 | 1.624399  | C | 6.069199  | 1.755400  | 1.330699  |
| C  | -4.682800 | -2.368000 | 0.810999  | C | 4.754300  | 0.221299  | -1.468200 |
| C  | -3.924700 | 1.817400  | 1.107200  | C | 5.941799  | -0.498799 | -1.283900 |
| C  | -5.242600 | 2.298700  | 1.093400  | C | 6.653200  | -1.005800 | -2.369200 |
| C  | -5.618900 | 3.418100  | 1.830300  | C | 6.180800  | -0.813800 | -3.663799 |
| C  | -4.684700 | 4.067100  | 2.634500  | C | 4.987200  | -0.122500 | -3.866300 |
| C  | -3.379300 | 3.587899  | 2.692300  | C | 4.283499  | 0.384700  | -2.779600 |
| C  | -3.006200 | 2.484800  | 1.926899  | C | -1.647900 | -0.226200 | 0.033000  |
| C  | -1.947500 | -2.328200 | -2.386999 | C | -4.913700 | 0.136400  | -2.307899 |
| C  | -2.137000 | -3.397500 | -1.500600 | C | -6.114000 | -0.548499 | -1.653800 |
| C  | -2.139800 | -4.720400 | -1.935800 | C | -5.272500 | 1.608299  | -2.534100 |
| C  | -1.952400 | -5.007600 | -3.284599 | C | -4.667400 | -0.525400 | -3.660800 |
| C  | -1.755400 | -3.965300 | -4.187300 | C | -0.924800 | 2.635800  | -0.627199 |
| C  | -1.750899 | -2.646500 | -3.739900 | C | -2.051800 | 4.955300  | -1.071100 |
| C  | -1.113000 | 0.476199  | -3.056300 | C | -1.372400 | 5.561499  | -2.295800 |
| C  | -1.612399 | 1.658200  | -3.616800 | C | -1.839099 | 5.837300  | 0.155600  |
| C  | -0.897900 | 2.376700  | -4.572400 | C | -3.538499 | 4.734400  | -1.325600 |
| C  | 0.353400  | 1.931500  | -4.988600 | C | 1.681900  | 1.405600  | -0.298200 |
| C  | 0.880500  | 0.767100  | -4.436800 | C | 2.710300  | 3.613200  | -1.020599 |
| C  | 0.154500  | 0.054799  | -3.486499 | C | 4.170700  | 4.007700  | -1.185100 |
| C  | -0.552899 | -0.105900 | 2.884799  | C | 2.060200  | 4.443100  | 0.081300  |
| C  | -1.295700 | -0.652700 | 3.939800  | C | 1.968600  | 3.753199  | -2.343500 |

|   |           |           |           |   |           |           |           |
|---|-----------|-----------|-----------|---|-----------|-----------|-----------|
| C | 2.309199  | -1.074100 | 1.944500  | H | -2.452000 | -2.714900 | 2.137000  |
| C | 2.819300  | -2.015700 | 4.325799  | H | 3.014599  | 1.398200  | 2.768700  |
| C | 2.288900  | -0.975500 | 5.308200  | H | 4.247400  | 2.331799  | 4.693999  |
| C | 4.314500  | -2.239200 | 4.529600  | H | 6.666100  | 2.868100  | 4.485200  |
| C | 2.043800  | -3.324299 | 4.451199  | H | 7.826300  | 2.507899  | 2.320600  |
| C | 2.011800  | -1.667300 | -1.032399 | H | 6.587499  | 1.620199  | 0.380500  |
| C | 2.480999  | -3.516100 | -2.820999 | H | 6.323099  | -0.666199 | -0.276000 |
| C | 1.629599  | -4.716699 | -2.422499 | H | 7.579199  | -1.552500 | -2.202600 |
| C | 2.101500  | -3.012299 | -4.209800 | H | 6.737500  | -1.204500 | -4.512900 |
| C | 3.969000  | -3.846199 | -2.756000 | H | 4.608799  | 0.026699  | -4.877100 |
| H | -4.316999 | 0.089299  | 3.118900  | H | 3.341200  | 0.911200  | -2.947599 |
| H | -5.234099 | -1.674199 | 4.570899  | H | -7.014600 | -0.410000 | -2.266099 |
| H | -5.822500 | -3.896300 | 3.624000  | H | -5.939800 | -1.624399 | -1.542000 |
| H | -5.468800 | -4.333000 | 1.200899  | H | -6.321600 | -0.141299 | -0.655200 |
| H | -4.505800 | -2.584100 | -0.243300 | H | -6.214799 | 1.699300  | -3.091400 |
| H | -6.003299 | 1.780500  | 0.506499  | H | -5.384800 | 2.138200  | -1.580400 |
| H | -6.646800 | 3.773600  | 1.792200  | H | -4.495600 | 2.120600  | -3.113799 |
| H | -4.979500 | 4.931699  | 3.226000  | H | -5.552999 | -0.425700 | -4.301500 |
| H | -2.644500 | 4.067499  | 3.338100  | H | -3.822200 | -0.059199 | -4.185000 |
| H | -1.980400 | 2.122299  | 1.983600  | H | -4.450999 | -1.594199 | -3.539700 |
| H | -2.280400 | -3.195300 | -0.441300 | H | -1.843200 | 6.521100  | -2.539399 |
| H | -2.278700 | -5.522399 | -1.212400 | H | -0.306699 | 5.733099  | -2.102699 |
| H | -1.953400 | -6.039200 | -3.631900 | H | -1.462399 | 4.892799  | -3.160299 |
| H | -1.605899 | -4.179600 | -5.244400 | H | -2.285900 | 6.822200  | -0.024599 |
| H | -1.596700 | -1.845799 | -4.464999 | H | -2.316000 | 5.391400  | 1.035900  |
| H | -2.582499 | 2.029900  | -3.288000 | H | -0.770200 | 5.971899  | 0.358900  |
| H | -1.324800 | 3.281800  | -5.003700 | H | -4.018800 | 5.697499  | -1.536200 |
| H | 0.912699  | 2.487499  | -5.738699 | H | -3.688599 | 4.073400  | -2.187400 |
| H | 1.858500  | 0.403200  | -4.754200 | H | -4.024100 | 4.280599  | -0.453200 |
| H | 0.584700  | -0.855299 | -3.069000 | H | 4.242499  | 5.052000  | -1.511899 |
| H | -1.756299 | -1.633700 | 3.829400  | H | 4.714699  | 3.906900  | -0.237399 |
| H | -2.085399 | -0.413399 | 5.927699  | H | 4.665200  | 3.378599  | -1.936200 |
| H | -1.048699 | 1.821700  | 6.264499  | H | 2.071800  | 5.507800  | -0.188799 |
| H | 0.332399  | 2.816400  | 4.443200  | H | 1.021000  | 4.133599  | 0.244099  |
| H | 0.616699  | 1.613699  | 2.310600  | H | 2.608900  | 4.319000  | 1.024200  |
| H | 1.566300  | -3.308900 | 0.731700  | H | 1.948100  | 4.807100  | -2.652599 |
| H | 1.326000  | -5.727799 | 1.090400  | H | 2.469600  | 3.177399  | -3.131900 |
| H | -0.785900 | -6.658600 | 2.012299  | H | 0.937700  | 3.388099  | -2.267199 |
| H | -2.671899 | -5.111199 | 2.549899  | H | 2.455899  | -1.325299 | 6.334200  |

|   |          |           |           |   |          |           |           |
|---|----------|-----------|-----------|---|----------|-----------|-----------|
| H | 2.809700 | -0.019399 | 5.174799  | H | 1.921299 | -5.084900 | -1.431600 |
| H | 1.214899 | -0.813099 | 5.159799  | H | 0.566899 | -4.449600 | -2.389400 |
| H | 4.496700 | -2.616999 | 5.542600  | H | 2.332300 | -3.785500 | -4.952099 |
| H | 4.699700 | -2.970600 | 3.810399  | H | 1.028999 | -2.788300 | -4.265000 |
| H | 4.864799 | -1.299700 | 4.400399  | H | 2.671899 | -2.107800 | -4.457699 |
| H | 2.165100 | -3.724600 | 5.465000  | H | 4.193099 | -4.663100 | -3.452600 |
| H | 0.975299 | -3.166000 | 4.257699  | H | 4.574000 | -2.972700 | -3.028300 |
| H | 2.411400 | -4.066599 | 3.733600  | H | 4.249700 | -4.162799 | -1.745000 |
| H | 1.767600 | -5.523799 | -3.152400 |   |          |           |           |

### Cluster 5<sub>opt</sub>

|    |           |           |           |   |           |           |           |
|----|-----------|-----------|-----------|---|-----------|-----------|-----------|
| Ni | -2.463599 | 0.024400  | 0.548300  | C | -1.436000 | -0.808000 | 3.666600  |
| Ni | -1.088699 | 1.925500  | -0.390500 | C | -2.037700 | -1.521799 | 4.709000  |
| Ni | 0.042200  | -0.344700 | 0.004099  | C | -2.099300 | -1.001800 | 6.001600  |
| Ni | 2.123600  | -1.651100 | 0.286600  | C | -1.568500 | 0.255100  | 6.277800  |
| Ni | 1.523400  | 0.389200  | 1.888300  | C | -0.986700 | 0.994400  | 5.250000  |
| Si | -2.893599 | 0.828199  | -1.983999 | C | -0.931999 | 0.466499  | 3.964500  |
| Si | -1.263399 | -1.411300 | 1.871000  | C | -1.926100 | -3.178499 | 1.695599  |
| Si | 1.004000  | 2.043100  | 0.431999  | C | -1.630000 | -4.215000 | 2.592800  |
| Si | 1.553600  | -2.410000 | -1.710799 | C | -2.147199 | -5.496300 | 2.418700  |
| N  | -4.632000 | -0.777000 | 2.372000  | C | -2.965300 | -5.776100 | 1.326299  |
| N  | -3.079700 | 1.630200  | -0.456000 | C | -3.261699 | -4.767699 | 0.412800  |
| N  | -0.593699 | 4.647100  | -1.356200 | C | -2.752199 | -3.485800 | 0.604900  |
| N  | -0.140700 | -2.158200 | -2.276200 | C | 1.073599  | 3.718899  | 1.380099  |
| N  | 1.805799  | -1.488099 | 2.174900  | C | 0.105599  | 3.995399  | 2.359600  |
| N  | 4.963099  | -1.918600 | -0.540100 | C | 0.086900  | 5.201400  | 3.054299  |
| N  | 3.325000  | 2.118200  | 3.479500  | C | 1.052899  | 6.172899  | 2.791799  |
| C  | -4.323300 | -0.270600 | -2.572200 | C | 2.030000  | 5.919999  | 1.831899  |
| C  | -5.028400 | -1.056600 | -1.646300 | C | 2.035300  | 4.708900  | 1.137500  |
| C  | -5.963700 | -2.000199 | -2.054900 | C | 2.458800  | 2.210500  | -0.800099 |
| C  | -6.223900 | -2.178499 | -3.412300 | C | 3.767000  | 1.874799  | -0.416500 |
| C  | -5.546000 | -1.406400 | -4.348900 | C | 4.852500  | 2.086000  | -1.263000 |
| C  | -4.606699 | -0.466399 | -3.930000 | C | 4.658599  | 2.624000  | -2.532699 |
| C  | -2.316100 | 1.855200  | -3.476400 | C | 3.369600  | 2.952200  | -2.942199 |
| C  | -3.175599 | 2.604099  | -4.291900 | C | 2.289500  | 2.744399  | -2.086300 |
| C  | -2.693000 | 3.366200  | -5.353300 | C | 1.686300  | -4.229300 | -1.191099 |
| C  | -1.328199 | 3.390000  | -5.629900 | C | 0.575699  | -4.861699 | -0.611500 |
| C  | -0.453200 | 2.649299  | -4.838600 | C | 0.671200  | -6.134899 | -0.058600 |
| C  | -0.946400 | 1.895299  | -3.778099 | C | 1.888899  | -6.810199 | -0.069700 |

|   |           |           |           |   |           |           |           |
|---|-----------|-----------|-----------|---|-----------|-----------|-----------|
| C | 3.006799  | -6.201500 | -0.633899 | C | 4.165200  | 3.003499  | 4.236700  |
| C | 2.904299  | -4.924800 | -1.179100 | C | 5.005800  | 2.157300  | 5.188699  |
| C | 2.661600  | -1.992100 | -3.190100 | C | 3.266400  | 3.964200  | 5.009800  |
| C | 3.308299  | -2.930199 | -4.005700 | C | 5.051300  | 3.763300  | 3.253400  |
| C | 4.079900  | -2.531300 | -5.095700 | H | -4.817700 | -0.942200 | -0.580700 |
| C | 4.214900  | -1.178099 | -5.395600 | H | -6.486500 | -2.604199 | -1.314199 |
| C | 3.588900  | -0.228600 | -4.592100 | H | -6.951599 | -2.919499 | -3.737300 |
| C | 2.831100  | -0.633500 | -3.497199 | H | -5.742899 | -1.539899 | -5.410900 |
| C | -3.731500 | -0.408900 | 1.705399  | H | -4.071300 | 0.115100  | -4.681099 |
| C | -5.730099 | -1.415699 | 3.050299  | H | -4.251099 | 2.587999  | -4.103900 |
| C | -7.020200 | -0.999500 | 2.348500  | H | -3.383799 | 3.938099  | -5.969899 |
| C | -5.733900 | -0.955200 | 4.503800  | H | -0.950299 | 3.977999  | -6.464200 |
| C | -5.524599 | -2.925300 | 2.951000  | H | 0.616800  | 2.646600  | -5.048700 |
| C | -4.074099 | 2.624100  | -0.022800 | H | -0.250800 | 1.318000  | -3.165500 |
| C | -5.468699 | 2.002399  | 0.083899  | H | -2.453100 | -2.513500 | 4.518199  |
| C | -4.158000 | 3.782100  | -1.019499 | H | -2.562300 | -1.583600 | 6.797600  |
| C | -3.662300 | 3.180899  | 1.338400  | H | -1.613499 | 0.657699  | 7.287699  |
| C | -0.742700 | 3.561500  | -0.921800 | H | -0.572600 | 1.983800  | 5.444699  |
| C | -0.498200 | 6.000500  | -1.822999 | H | -0.463600 | 1.051400  | 3.167100  |
| C | 0.921400  | 6.231099  | -2.332500 | H | -0.982599 | -4.022700 | 3.450200  |
| C | -0.812600 | 6.913699  | -0.640399 | H | -1.906500 | -6.280500 | 3.134199  |
| C | -1.509899 | 6.186100  | -2.951100 | H | -3.367300 | -6.777799 | 1.187200  |
| C | -1.513500 | -0.209000 | -1.301700 | H | -3.893300 | -4.973999 | -0.450900 |
| C | -0.623900 | -1.147800 | -1.554099 | H | -2.992100 | -2.698400 | -0.112600 |
| C | -0.907900 | -2.707300 | -3.444100 | H | -0.664999 | 3.250400  | 2.573100  |
| C | -0.141299 | -3.876800 | -4.047600 | H | -0.683499 | 5.385000  | 3.801700  |
| C | -2.264600 | -3.205200 | -2.959100 | H | 1.043000  | 7.117999  | 3.331200  |
| C | -1.067300 | -1.619600 | -4.500200 | H | 2.791200  | 6.670100  | 1.618400  |
| C | 0.629300  | -1.348100 | 1.556900  | H | 2.806600  | 4.533900  | 0.383900  |
| C | 2.306700  | -2.347099 | 3.266600  | H | 3.941399  | 1.444700  | 0.571600  |
| C | 2.193000  | -3.802700 | 2.823399  | H | 5.859000  | 1.836099  | -0.926800 |
| C | 1.533100  | -2.109000 | 4.556200  | H | 5.506000  | 2.784900  | -3.196899 |
| C | 3.769499  | -1.974600 | 3.476300  | H | 3.201900  | 3.379399  | -3.931399 |
| C | 3.843300  | -1.856300 | -0.183200 | H | 1.289399  | 3.016799  | -2.425500 |
| C | 6.315800  | -1.963100 | -1.024699 | H | -0.383399 | -4.340799 | -0.581300 |
| C | 6.388799  | -1.193800 | -2.340299 | H | -0.211000 | -6.590899 | 0.388900  |
| C | 6.688800  | -3.426600 | -1.246000 | H | 1.967799  | -7.805999 | 0.361699  |
| C | 7.207499  | -1.326900 | 0.038000  | H | 3.963500  | -6.721399 | -0.646500 |
| C | 2.612799  | 1.446400  | 2.824700  | H | 3.795900  | -4.456200 | -1.597600 |



|   |           |           |           |   |           |           |           |
|---|-----------|-----------|-----------|---|-----------|-----------|-----------|
| H | 3.194600  | -3.995399 | -3.797000 | H | 0.028200  | -4.674400 | -3.315799 |
| H | 4.568799  | -3.279099 | -5.717800 | H | -2.862700 | -3.554100 | -3.811000 |
| H | 4.811400  | -0.865200 | -6.250300 | H | -2.138700 | -4.039100 | -2.256299 |
| H | 3.699800  | 0.834400  | -4.802700 | H | -2.832200 | -2.412300 | -2.460800 |
| H | 2.370500  | 0.126299  | -2.858700 | H | -1.612499 | -2.012700 | -5.368500 |
| H | -7.874700 | -1.493699 | 2.825700  | H | -1.628100 | -0.760199 | -4.118700 |
| H | -7.165900 | 0.084900  | 2.410900  | H | -0.084600 | -1.263300 | -4.836499 |
| H | -6.997600 | -1.285400 | 1.289800  | H | 2.566600  | -4.470000 | 3.611200  |
| H | -6.556800 | -1.443200 | 5.039500  | H | 1.151099  | -4.069799 | 2.605999  |
| H | -4.787800 | -1.210100 | 4.994600  | H | 2.776500  | -3.977600 | 1.909399  |
| H | -5.871299 | 0.130000  | 4.564900  | H | 1.989800  | -2.685099 | 5.371199  |
| H | -6.353800 | -3.442299 | 3.448799  | H | 1.545900  | -1.045700 | 4.830500  |
| H | -5.486400 | -3.243700 | 1.901700  | H | 0.486100  | -2.416800 | 4.466900  |
| H | -4.583600 | -3.226299 | 3.426900  | H | 4.217300  | -2.620399 | 4.241900  |
| H | -6.202300 | 2.761400  | 0.387900  | H | 4.335200  | -2.090100 | 2.543100  |
| H | -5.790499 | 1.587900  | -0.880299 | H | 3.857800  | -0.930699 | 3.804199  |
| H | -5.484699 | 1.196400  | 0.824800  | H | 7.424599  | -1.192500 | -2.701500 |
| H | -4.862000 | 4.544899  | -0.659799 | H | 5.750900  | -1.661300 | -3.099999 |
| H | -3.178100 | 4.251600  | -1.156400 | H | 6.055400  | -0.157800 | -2.209300 |
| H | -4.514000 | 3.438899  | -2.000199 | H | 7.736100  | -3.494099 | -1.563200 |
| H | -4.421300 | 3.876900  | 1.721200  | H | 6.560800  | -4.009199 | -0.326199 |
| H | -3.532400 | 2.369400  | 2.067400  | H | 6.061699  | -3.864399 | -2.032000 |
| H | -2.707200 | 3.718699  | 1.258700  | H | 8.250400  | -1.329900 | -0.300099 |
| H | 1.027900  | 7.268199  | -2.672700 | H | 6.901700  | -0.290499 | 0.223700  |
| H | 1.651499  | 6.040500  | -1.537400 | H | 7.142200  | -1.880800 | 0.981699  |
| H | 1.140800  | 5.562499  | -3.174600 | H | 5.658000  | 2.806099  | 5.785199  |
| H | -0.775900 | 7.961699  | -0.961700 | H | 4.362599  | 1.587200  | 5.869000  |
| H | -1.815699 | 6.700200  | -0.250600 | H | 5.631400  | 1.451699  | 4.630000  |
| H | -0.086800 | 6.762499  | 0.168199  | H | 3.885700  | 4.631900  | 5.620999  |
| H | -1.437200 | 7.206800  | -3.345999 | H | 2.663900  | 4.570700  | 4.323200  |
| H | -1.314800 | 5.475300  | -3.763800 | H | 2.591700  | 3.409400  | 5.672000  |
| H | -2.532799 | 6.023400  | -2.591800 | H | 5.707700  | 4.448600  | 3.802899  |
| H | -1.384711 | 0.080575  | -0.248343 | H | 5.673400  | 3.069300  | 2.675800  |
| H | -0.731999 | -4.293600 | -4.872399 | H | 4.433899  | 4.343199  | 2.557599  |
| H | 0.824400  | -3.561700 | -4.458100 |   |           |           |           |

### X-ray data collection and reduction

X-ray crystallography for compounds **2**, **3**, **4** and **5** was performed on a Rigaku Saturn CCD area detector with graphite monochromated Mo-K $\alpha$  radiation ( $\lambda=0.71075$  Å), and single crystals of **3** suitable for X-ray crystallography were analyzed by synchrotron radiation at beam line BL02B1 ( $\lambda=0.41500$  Å) of Spring-8 (Hyogo, Japan) using PILATUS3 X CdTe 1M detector. The data were collected at 123(2) K for **2** and **5** and 100(1) K for **3** and **4** using  $\omega$  scan in the  $\theta$  range of  $1.86 \leq \theta \leq 31.21$  deg (**2**),  $4.31 \leq \theta \leq 17.82$  deg (**3**),  $1.65 \leq \theta \leq 15.49$  deg (**4**),  $1.96 \leq \theta \leq 31.28$  deg (**5**). The data obtained were processed using Crystal-Clear (Rigaku) on a Pentium computer, and were corrected for Lorentz and polarization effects. The structures were solved by direct methods<sup>12</sup>, and expanded using Fourier techniques. Hydrogen atoms were refined using the riding model. The final cycle of full-matrix least-squares refinement on  $F^2$  was based on 15,917 observed reflections and 676 variable parameters for **2**, 67,846 observed reflections and 1,542 variable parameters for **3**, 7,039 observed reflections and 340 variable parameters for **4**, 25,607 observed reflections and 886 variable parameters for **5**. Neutral atom scattering factors were taken from International Tables for Crystallography (IT), Vol. C, Table 6.1.1.4<sup>13</sup>. Anomalous dispersion effects were included in  $F_{\text{calc}}$ <sup>14</sup>; the values for  $\Delta f'$  and  $\Delta f''$  were those of Creagh and McAuley<sup>15</sup>. The values for the mass attenuation coefficients are those of Creagh and Hubbell<sup>16</sup>. All calculations were performed using the CrystalStructure<sup>17</sup> crystallographic software package except for refinement, which was performed using SHELXL Version 2017/1<sup>18</sup>. Details of final refinement as well as the bond lengths and angle are summarized in Tables S4, S5, S6 and S7, and the numbering scheme employed is also shown in Figure S7, S8, S9 and S10, which were drawn with ORTEP at 50% probability ellipsoids. CCDC 2120736 (**2**), 2120737 (**3**), 2120738 (**4**) and 2120739 (**5**) contain the supplementary crystallographic data for this paper.

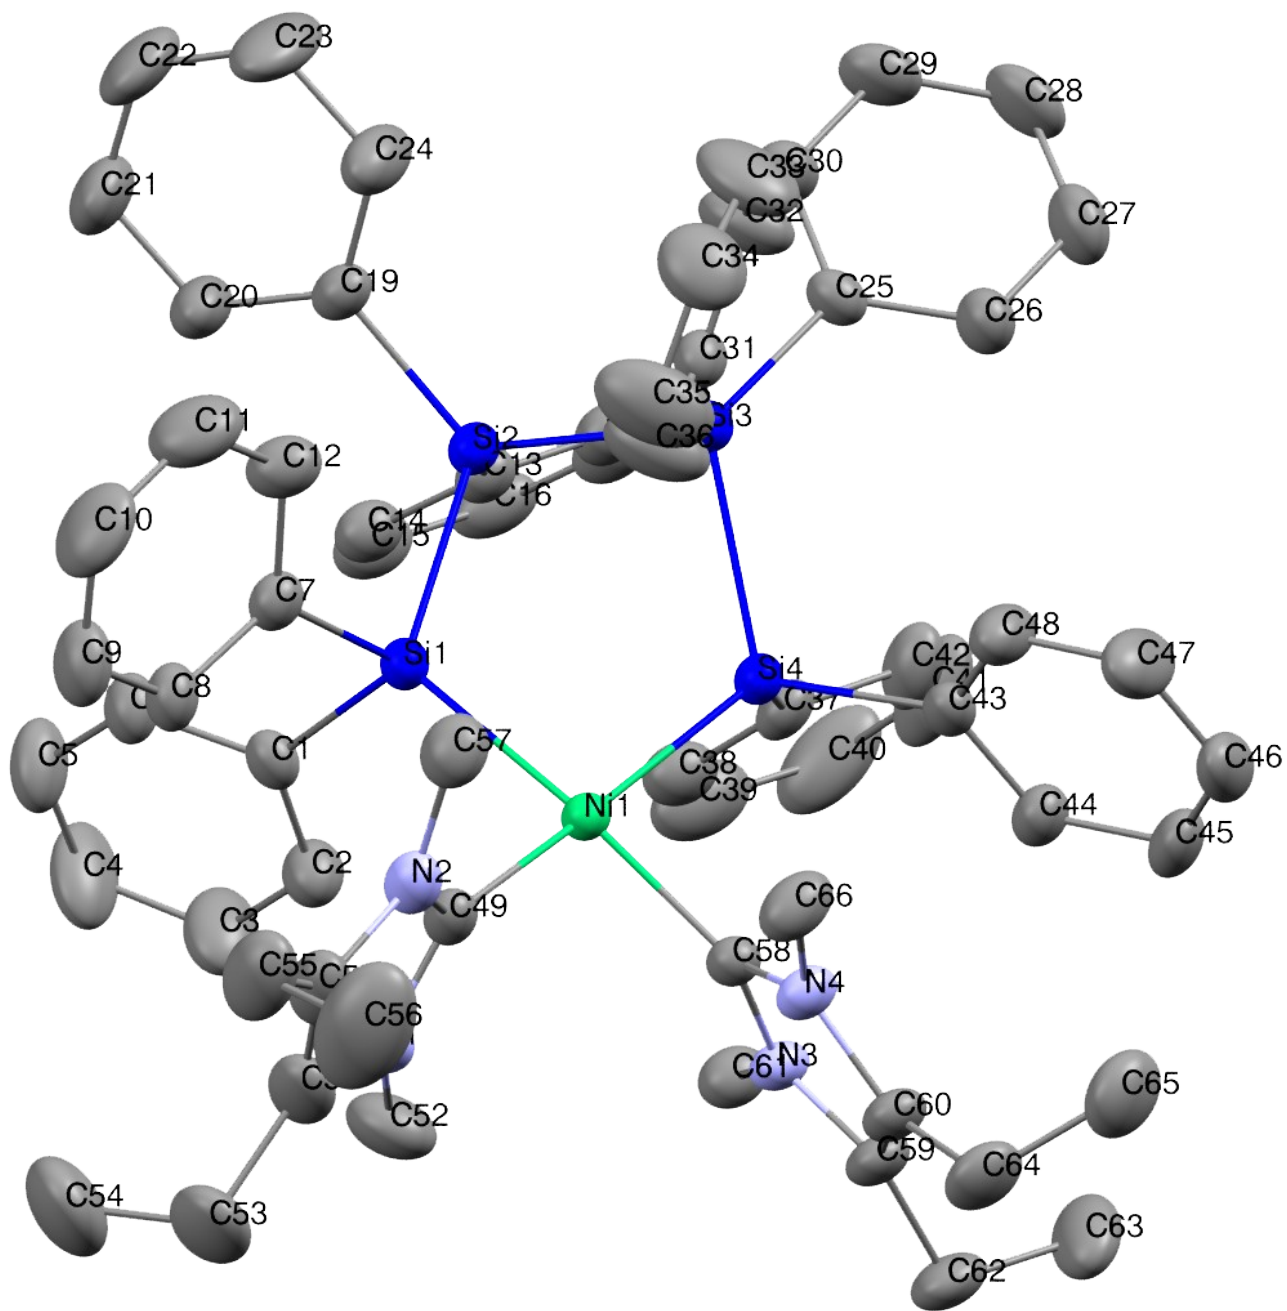

**Figure S7.** ORTEP drawing of **2** (50% probability of the thermal ellipsoids). Hydrogen atoms were omitted for clarity.

**Table S4-1.** Crystal data and structure refinement for **3**.

|                                      |                                                                                                                                                     |
|--------------------------------------|-----------------------------------------------------------------------------------------------------------------------------------------------------|
| Empirical Formula                    | C <sub>66</sub> H <sub>72</sub> N <sub>4</sub> NiSi <sub>4</sub>                                                                                    |
| Formula Weight                       | 1092.36                                                                                                                                             |
| Crystal Color, Habit                 | yellow, block                                                                                                                                       |
| Crystal Dimensions                   | 0.100 X 0.100 X 0.100 mm                                                                                                                            |
| Crystal System                       | triclinic                                                                                                                                           |
| Lattice Type                         | Primitive                                                                                                                                           |
| Lattice Parameters                   | a = 11.7807(4) Å<br>b = 11.8079(3) Å<br>c = 22.9033(7) Å<br>α = 80.502(2) °<br>β = 78.053(3) °<br>γ = 71.215(3) °<br>V = 2934.25(16) Å <sup>3</sup> |
| Space Group                          | P-1 (#2)                                                                                                                                            |
| Z value                              | 2                                                                                                                                                   |
| D <sub>calc</sub>                    | 1.236 g/cm <sup>3</sup>                                                                                                                             |
| F <sub>000</sub>                     | 1160.00                                                                                                                                             |
| μ(MoKα)                              | 4.561 cm <sup>-1</sup>                                                                                                                              |
| Diffractometer                       | Saturn724                                                                                                                                           |
| Radiation                            | MoKα (λ = 0.71075 Å)<br>graphite monochromated                                                                                                      |
| Temperature                          | -160.0°C                                                                                                                                            |
| Detector Aperture                    | 72.8 x 72.8 mm                                                                                                                                      |
| Data Images                          | 720 exposures                                                                                                                                       |
| ω oscillation Range (χ=45.0, φ=0.0)  | -70.0 - 110.0°                                                                                                                                      |
| Exposure Rate                        | 10.0 sec./°                                                                                                                                         |
| Detector Swing Angle                 | 20.00°                                                                                                                                              |
| ω oscillation Range (χ=45.0, φ=90.0) | -70.0 - 110.0°                                                                                                                                      |
| Exposure Rate                        | 10.0 sec./°                                                                                                                                         |
| Detector Swing Angle                 | 20.00°                                                                                                                                              |
| Detector Position                    | 45.00 mm                                                                                                                                            |
| Pixel Size                           | 0.035 mm                                                                                                                                            |
| 2θ <sub>max</sub>                    | 62.5°                                                                                                                                               |
| No. of Reflections Measured          | Total: 28326<br>Unique: 15917 (R <sub>int</sub> = 0.0276)                                                                                           |
| Corrections                          | Lorentz-polarization<br>Absorption                                                                                                                  |

|                                       |                                                                                                                      |
|---------------------------------------|----------------------------------------------------------------------------------------------------------------------|
| Structure Solution                    | (trans. factors: 0.860 - 0.955)<br>Direct Methods (SHELXT Version 2014/5)                                            |
| Refinement                            | Full-matrix least-squares on $F^2$                                                                                   |
| Function Minimized                    | $\Sigma w (F_o^2 - F_c^2)^2$                                                                                         |
| Least Squares Weights                 | $w = 1 / [ \sigma^2(F_o^2) + (0.0679 \cdot P)^2 + 1.6180 \cdot P ]$<br>where $P = (\text{Max}(F_o^2, 0) + 2F_c^2)/3$ |
| $2\theta_{\text{max}}$ cutoff         | 62.5°                                                                                                                |
| Anomalous Dispersion                  | All non-hydrogen atoms                                                                                               |
| No. Observations (All reflections)    | 15917                                                                                                                |
| No. Variables                         | 676                                                                                                                  |
| Reflection/Parameter Ratio            | 23.55                                                                                                                |
| Residuals: R1 ( $I > 2.00\sigma(I)$ ) | 0.0567                                                                                                               |
| Residuals: R (All reflections)        | 0.0824                                                                                                               |
| Residuals: wR2 (All reflections)      | 0.1504                                                                                                               |
| Goodness of Fit Indicator             | 1.035                                                                                                                |
| Max Shift/Error in Final Cycle        | 0.002                                                                                                                |
| Maximum peak in Final Diff. Map       | 0.99 e <sup>-</sup> /Å <sup>3</sup>                                                                                  |
| Minimum peak in Final Diff. Map       | -0.55 e <sup>-</sup> /Å <sup>3</sup>                                                                                 |

**Table S4-2.** Atomic coordinates and  $B_{\text{iso}}/B_{\text{eq}}$  and occupancy

|     |             |             |             |           |
|-----|-------------|-------------|-------------|-----------|
| Ni1 | 0.49061(3)  | 0.70819(3)  | 0.73379(2)  | 1.701(6)  |
| Si1 | 0.35815(6)  | 0.87777(6)  | 0.69355(3)  | 1.917(11) |
| Si2 | 0.15578(6)  | 0.94471(6)  | 0.74766(3)  | 1.971(11) |
| Si3 | 0.14851(6)  | 0.75667(6)  | 0.79876(3)  | 2.027(11) |
| Si4 | 0.35047(6)  | 0.69854(6)  | 0.81887(3)  | 1.945(11) |
| N1  | 0.7031(2)   | 0.7298(2)   | 0.64129(10) | 3.11(4)   |
| N2  | 0.6012(2)   | 0.6388(2)   | 0.61043(9)  | 2.65(4)   |
| N3  | 0.67404(18) | 0.60195(18) | 0.81394(9)  | 2.20(3)   |
| N4  | 0.65512(18) | 0.46913(18) | 0.76807(9)  | 2.30(3)   |
| C1  | 0.4157(2)   | 1.0153(2)   | 0.68331(11) | 2.28(4)   |
| C2  | 0.4896(3)   | 1.0291(3)   | 0.71924(13) | 3.25(5)   |
| C3  | 0.5205(4)   | 1.1340(3)   | 0.71529(16) | 4.90(8)   |
| C4  | 0.4771(4)   | 1.2279(3)   | 0.67440(16) | 5.36(9)   |
| C5  | 0.4057(4)   | 1.2172(3)   | 0.63726(14) | 4.11(6)   |
| C6  | 0.3756(3)   | 1.1129(2)   | 0.64151(11) | 2.77(5)   |
| C7  | 0.3400(2)   | 0.8704(2)   | 0.61365(11) | 2.32(4)   |
| C8  | 0.4320(3)   | 0.8840(2)   | 0.56653(11) | 2.71(4)   |
| C9  | 0.4297(3)   | 0.8709(3)   | 0.50814(13) | 3.69(6)   |
| C10 | 0.3340(4)   | 0.8429(3)   | 0.49507(15) | 4.79(8)   |
| C11 | 0.2401(3)   | 0.8308(3)   | 0.54050(16) | 4.55(7)   |
| C12 | 0.2435(3)   | 0.8448(3)   | 0.59856(14) | 3.28(5)   |
| C13 | 0.1378(2)   | 1.0551(2)   | 0.80282(11) | 2.30(4)   |
| C14 | 0.1728(3)   | 1.1582(2)   | 0.78428(13) | 2.89(5)   |
| C15 | 0.1562(3)   | 1.2420(3)   | 0.82305(14) | 3.46(5)   |
| C16 | 0.1044(3)   | 1.2243(3)   | 0.88218(14) | 3.55(6)   |
| C17 | 0.0684(3)   | 1.1233(3)   | 0.90206(13) | 3.58(6)   |
| C18 | 0.0849(3)   | 1.0389(3)   | 0.86245(12) | 2.92(5)   |
| C19 | 0.0373(2)   | 1.0283(2)   | 0.69841(11) | 2.46(4)   |
| C20 | 0.0446(3)   | 1.1365(3)   | 0.66581(14) | 3.78(6)   |
| C21 | -0.0417(3)  | 1.2042(3)   | 0.63124(16) | 4.56(7)   |
| C22 | -0.1367(3)  | 1.1662(3)   | 0.62831(16) | 4.73(7)   |
| C23 | -0.1470(4)  | 1.0617(4)   | 0.6598(2)   | 5.82(9)   |
| C24 | -0.0603(3)  | 0.9925(3)   | 0.69444(16) | 4.23(7)   |
| C25 | 0.0209(2)   | 0.7584(2)   | 0.86449(11) | 2.39(4)   |
| C26 | 0.0346(3)   | 0.6719(3)   | 0.91360(12) | 3.06(5)   |
| C27 | -0.0603(3)  | 0.6724(3)   | 0.96056(13) | 3.72(6)   |
| C28 | -0.1708(3)  | 0.7579(3)   | 0.95904(14) | 3.96(6)   |
| C29 | -0.1871(3)  | 0.8427(3)   | 0.91103(14) | 3.64(6)   |

|     |            |           |             |          |
|-----|------------|-----------|-------------|----------|
| C30 | -0.0923(2) | 0.8440(3) | 0.86424(12) | 2.96(5)  |
| C31 | 0.1311(2)  | 0.6555(2) | 0.74730(11) | 2.33(4)  |
| C32 | 0.0257(3)  | 0.6253(3) | 0.75183(15) | 4.35(7)  |
| C33 | 0.0171(4)  | 0.5458(4) | 0.71584(17) | 5.40(9)  |
| C34 | 0.1117(4)  | 0.4966(3) | 0.67475(16) | 4.65(7)  |
| C35 | 0.2172(4)  | 0.5260(4) | 0.6686(2)   | 6.17(11) |
| C36 | 0.2256(3)  | 0.6028(3) | 0.70568(17) | 4.75(8)  |
| C37 | 0.3357(2)  | 0.7990(2) | 0.87853(11) | 2.53(4)  |
| C38 | 0.3747(3)  | 0.9000(3) | 0.86604(14) | 3.25(5)  |
| C39 | 0.3680(3)  | 0.9711(3) | 0.90958(19) | 4.93(8)  |
| C40 | 0.3179(4)  | 0.9423(4) | 0.96784(19) | 6.26(11) |
| C41 | 0.2733(4)  | 0.8460(4) | 0.98145(15) | 5.63(10) |
| C42 | 0.2819(3)  | 0.7743(3) | 0.93773(12) | 3.72(6)  |
| C43 | 0.3827(2)  | 0.5418(2) | 0.86226(11) | 2.38(4)  |
| C44 | 0.4546(2)  | 0.5100(2) | 0.90687(12) | 2.85(5)  |
| C45 | 0.4832(3)  | 0.3959(3) | 0.93708(13) | 3.48(6)  |
| C46 | 0.4425(3)  | 0.3091(3) | 0.92303(16) | 4.29(7)  |
| C47 | 0.3730(3)  | 0.3369(3) | 0.87892(18) | 4.65(7)  |
| C48 | 0.3430(3)  | 0.4518(3) | 0.84922(15) | 3.70(6)  |
| C49 | 0.6013(2)  | 0.6950(2) | 0.65767(11) | 2.37(4)  |
| C50 | 0.7654(3)  | 0.6964(3) | 0.58497(14) | 3.82(6)  |
| C51 | 0.7012(3)  | 0.6413(3) | 0.56531(12) | 3.50(6)  |
| C52 | 0.7436(3)  | 0.7915(4) | 0.67841(16) | 4.59(7)  |
| C53 | 0.8789(3)  | 0.7280(4) | 0.55512(17) | 5.51(9)  |
| C54 | 0.8553(4)  | 0.8558(4) | 0.5269(2)   | 7.33(12) |
| C55 | 0.7225(4)  | 0.5879(3) | 0.50781(14) | 4.71(8)  |
| C56 | 0.7815(5)  | 0.4530(4) | 0.51326(19) | 7.81(14) |
| C57 | 0.5068(3)  | 0.5911(3) | 0.60515(12) | 3.25(5)  |
| C58 | 0.6085(2)  | 0.5874(2) | 0.77515(10) | 2.04(4)  |
| C59 | 0.7597(2)  | 0.4950(2) | 0.82999(12) | 2.66(4)  |
| C60 | 0.7486(2)  | 0.4113(2) | 0.80100(12) | 2.67(4)  |
| C61 | 0.6564(3)  | 0.7147(2) | 0.83642(13) | 3.03(5)  |
| C62 | 0.8407(3)  | 0.4857(3) | 0.87396(14) | 3.50(5)  |
| C63 | 0.7846(4)  | 0.4594(4) | 0.93816(15) | 5.27(8)  |
| C64 | 0.8177(3)  | 0.2814(3) | 0.79989(14) | 3.61(6)  |
| C65 | 0.7519(3)  | 0.1972(3) | 0.83771(16) | 4.62(7)  |
| C66 | 0.6100(3)  | 0.4104(3) | 0.73156(13) | 3.35(5)  |

$$B_{eq} = 8/3 \pi^2 (U_{11}(aa^*)^2 + U_{22}(bb^*)^2 + U_{33}(cc^*)^2 + 2U_{12}(aa^*bb^*)\cos \gamma + 2U_{13}(aa^*cc^*)\cos \beta + 2U_{23}(bb^*cc^*)\cos \alpha)$$

**Table S4-3.** Anisotropic displacement parameters

| atom | U <sub>11</sub> | U <sub>22</sub> | U <sub>33</sub> | U <sub>12</sub> | U <sub>13</sub> | U <sub>23</sub> |
|------|-----------------|-----------------|-----------------|-----------------|-----------------|-----------------|
| Ni1  | 0.02106(15)     | 0.02164(15)     | 0.02131(14)     | -0.00462(11)    | -0.00401(11)    | -0.00343(11)    |
| Si1  | 0.0247(3)       | 0.0240(3)       | 0.0228(3)       | -0.0066(3)      | -0.0032(3)      | -0.0010(2)      |
| Si2  | 0.0254(3)       | 0.0233(3)       | 0.0248(3)       | -0.0048(3)      | -0.0054(3)      | -0.0023(2)      |
| Si3  | 0.0242(3)       | 0.0262(3)       | 0.0250(3)       | -0.0070(3)      | -0.0023(3)      | -0.0015(3)      |
| Si4  | 0.0239(3)       | 0.0255(3)       | 0.0224(3)       | -0.0051(3)      | -0.0045(3)      | -0.0004(2)      |
| N1   | 0.0283(12)      | 0.0467(14)      | 0.0384(13)      | -0.0086(10)     | 0.0007(10)      | -0.0045(11)     |
| N2   | 0.0332(12)      | 0.0351(12)      | 0.0255(10)      | -0.0023(10)     | -0.0011(9)      | -0.0050(9)      |
| N3   | 0.0240(10)      | 0.0276(10)      | 0.0316(11)      | -0.0032(8)      | -0.0091(8)      | -0.0055(8)      |
| N4   | 0.0274(11)      | 0.0255(10)      | 0.0323(11)      | -0.0005(8)      | -0.0090(9)      | -0.0064(8)      |
| C1   | 0.0317(13)      | 0.0288(12)      | 0.0252(11)      | -0.0110(10)     | 0.0020(10)      | -0.0048(9)      |
| C2   | 0.0481(17)      | 0.0428(16)      | 0.0383(15)      | -0.0204(14)     | -0.0129(13)     | 0.0009(12)      |
| C3   | 0.088(3)        | 0.064(2)        | 0.059(2)        | -0.049(2)       | -0.0308(19)     | 0.0030(17)      |
| C4   | 0.120(3)        | 0.052(2)        | 0.057(2)        | -0.057(2)       | -0.027(2)       | 0.0043(16)      |
| C5   | 0.087(3)        | 0.0345(15)      | 0.0410(16)      | -0.0269(16)     | -0.0161(16)     | 0.0033(12)      |
| C6   | 0.0478(16)      | 0.0322(13)      | 0.0265(12)      | -0.0143(12)     | -0.0061(11)     | -0.0022(10)     |
| C7   | 0.0325(13)      | 0.0248(12)      | 0.0289(12)      | -0.0042(10)     | -0.0077(10)     | -0.0031(9)      |
| C8   | 0.0432(15)      | 0.0303(13)      | 0.0273(12)      | -0.0103(12)     | -0.0048(11)     | -0.0003(10)     |
| C9   | 0.068(2)        | 0.0426(16)      | 0.0274(14)      | -0.0155(15)     | -0.0044(14)     | -0.0024(12)     |
| C10  | 0.086(3)        | 0.061(2)        | 0.0356(17)      | -0.009(2)       | -0.0274(18)     | -0.0136(15)     |
| C11  | 0.055(2)        | 0.063(2)        | 0.062(2)        | -0.0089(17)     | -0.0268(18)     | -0.0245(17)     |
| C12  | 0.0374(15)      | 0.0435(16)      | 0.0448(16)      | -0.0065(13)     | -0.0112(13)     | -0.0133(13)     |
| C13  | 0.0285(12)      | 0.0265(12)      | 0.0306(12)      | -0.0018(10)     | -0.0080(10)     | -0.0070(10)     |
| C14  | 0.0368(14)      | 0.0315(13)      | 0.0419(15)      | -0.0054(11)     | -0.0111(12)     | -0.0089(11)     |
| C15  | 0.0446(17)      | 0.0312(14)      | 0.0594(19)      | -0.0047(12)     | -0.0200(14)     | -0.0138(13)     |
| C16  | 0.0414(16)      | 0.0394(16)      | 0.0540(18)      | 0.0054(13)      | -0.0202(14)     | -0.0250(14)     |
| C17  | 0.0396(16)      | 0.0523(18)      | 0.0362(15)      | 0.0050(14)      | -0.0087(12)     | -0.0175(13)     |
| C18  | 0.0362(14)      | 0.0349(14)      | 0.0370(14)      | -0.0033(12)     | -0.0093(12)     | -0.0065(11)     |
| C19  | 0.0295(13)      | 0.0333(13)      | 0.0283(12)      | -0.0032(11)     | -0.0078(10)     | -0.0049(10)     |
| C20  | 0.0441(17)      | 0.0482(17)      | 0.0540(18)      | -0.0173(14)     | -0.0229(14)     | 0.0135(14)      |
| C21  | 0.063(2)        | 0.0506(19)      | 0.057(2)        | -0.0118(17)     | -0.0284(17)     | 0.0153(16)      |
| C22  | 0.066(2)        | 0.054(2)        | 0.063(2)        | -0.0049(17)     | -0.0442(19)     | 0.0019(16)      |
| C23  | 0.066(2)        | 0.067(2)        | 0.108(3)        | -0.028(2)       | -0.059(2)       | 0.009(2)        |
| C24  | 0.057(2)        | 0.0406(17)      | 0.073(2)        | -0.0202(15)     | -0.0341(17)     | 0.0107(15)      |
| C25  | 0.0285(13)      | 0.0338(13)      | 0.0294(12)      | -0.0121(11)     | 0.0018(10)      | -0.0083(10)     |
| C26  | 0.0392(15)      | 0.0430(15)      | 0.0310(13)      | -0.0121(13)     | -0.0013(11)     | -0.0010(11)     |
| C27  | 0.059(2)        | 0.0538(18)      | 0.0290(14)      | -0.0245(16)     | 0.0032(13)      | -0.0024(13)     |
| C28  | 0.0462(18)      | 0.067(2)        | 0.0388(16)      | -0.0267(17)     | 0.0179(13)      | -0.0202(15)     |



|     |            |            |            |             |             |             |
|-----|------------|------------|------------|-------------|-------------|-------------|
| C29 | 0.0318(15) | 0.0542(19) | 0.0502(18) | -0.0099(14) | 0.0052(13)  | -0.0207(15) |
| C30 | 0.0338(14) | 0.0386(15) | 0.0365(14) | -0.0081(12) | -0.0003(11) | -0.0076(11) |
| C31 | 0.0327(13) | 0.0272(12) | 0.0293(12) | -0.0099(10) | -0.0065(10) | -0.0010(9)  |
| C32 | 0.0405(17) | 0.078(2)   | 0.058(2)   | -0.0296(17) | 0.0091(15)  | -0.0327(18) |
| C33 | 0.064(2)   | 0.099(3)   | 0.068(2)   | -0.056(2)   | 0.0033(19)  | -0.034(2)   |
| C34 | 0.073(2)   | 0.058(2)   | 0.058(2)   | -0.0309(19) | -0.0059(18) | -0.0264(17) |
| C35 | 0.065(2)   | 0.091(3)   | 0.089(3)   | -0.032(2)   | 0.021(2)    | -0.063(3)   |
| C36 | 0.0419(18) | 0.077(2)   | 0.072(2)   | -0.0280(17) | 0.0139(16)  | -0.046(2)   |
| C37 | 0.0340(14) | 0.0288(12) | 0.0295(12) | 0.0003(11)  | -0.0115(11) | -0.0034(10) |
| C38 | 0.0384(15) | 0.0340(14) | 0.0503(17) | -0.0034(12) | -0.0120(13) | -0.0119(12) |
| C39 | 0.065(2)   | 0.0380(17) | 0.090(3)   | 0.0006(16)  | -0.033(2)   | -0.0271(18) |
| C40 | 0.111(3)   | 0.057(2)   | 0.066(3)   | 0.014(2)    | -0.048(2)   | -0.036(2)   |
| C41 | 0.106(3)   | 0.058(2)   | 0.0311(16) | 0.011(2)    | -0.0189(18) | -0.0132(15) |
| C42 | 0.064(2)   | 0.0394(16) | 0.0263(13) | -0.0002(14) | -0.0060(13) | -0.0056(11) |
| C43 | 0.0252(12) | 0.0303(12) | 0.0299(12) | -0.0055(10) | -0.0008(10) | 0.0006(10)  |
| C44 | 0.0352(14) | 0.0337(14) | 0.0344(14) | -0.0048(11) | -0.0079(11) | 0.0015(11)  |
| C45 | 0.0417(16) | 0.0424(16) | 0.0370(15) | -0.0013(13) | -0.0105(13) | 0.0091(12)  |
| C46 | 0.0440(17) | 0.0391(17) | 0.069(2)   | -0.0105(14) | -0.0104(16) | 0.0222(15)  |
| C47 | 0.054(2)   | 0.0374(17) | 0.091(3)   | -0.0238(15) | -0.0249(19) | 0.0124(17)  |
| C48 | 0.0420(16) | 0.0382(16) | 0.064(2)   | -0.0159(13) | -0.0229(15) | 0.0091(14)  |
| C49 | 0.0276(13) | 0.0304(12) | 0.0263(12) | -0.0027(10) | -0.0027(10) | -0.0016(10) |
| C50 | 0.0361(16) | 0.0556(19) | 0.0391(16) | -0.0050(14) | 0.0094(13)  | -0.0018(14) |
| C51 | 0.0424(17) | 0.0462(17) | 0.0289(14) | 0.0013(14)  | 0.0053(12)  | -0.0047(12) |
| C52 | 0.0438(18) | 0.076(2)   | 0.063(2)   | -0.0304(18) | 0.0017(16)  | -0.0194(19) |
| C53 | 0.046(2)   | 0.090(3)   | 0.057(2)   | -0.017(2)   | 0.0163(17)  | 0.000(2)    |
| C54 | 0.086(3)   | 0.103(4)   | 0.082(3)   | -0.046(3)   | 0.013(3)    | 0.015(3)    |
| C55 | 0.064(2)   | 0.065(2)   | 0.0316(16) | 0.0024(18)  | 0.0033(15)  | -0.0094(15) |
| C56 | 0.126(4)   | 0.078(3)   | 0.059(3)   | 0.021(3)    | -0.004(3)   | -0.032(2)   |
| C57 | 0.0508(17) | 0.0383(15) | 0.0345(14) | -0.0084(13) | -0.0092(13) | -0.0107(12) |
| C58 | 0.0231(11) | 0.0272(12) | 0.0259(11) | -0.0048(9)  | -0.0043(9)  | -0.0041(9)  |
| C59 | 0.0254(12) | 0.0356(14) | 0.0362(14) | -0.0001(11) | -0.0115(11) | -0.0036(11) |
| C60 | 0.0262(13) | 0.0326(13) | 0.0387(14) | 0.0000(11)  | -0.0105(11) | -0.0036(11) |
| C61 | 0.0386(15) | 0.0359(14) | 0.0426(15) | -0.0072(12) | -0.0135(12) | -0.0092(12) |
| C62 | 0.0358(15) | 0.0463(17) | 0.0519(17) | -0.0040(13) | -0.0229(13) | -0.0047(14) |
| C63 | 0.084(3)   | 0.085(3)   | 0.049(2)   | -0.045(2)   | -0.0367(19) | 0.0158(18)  |
| C64 | 0.0402(16) | 0.0335(15) | 0.0541(18) | 0.0086(13)  | -0.0138(14) | -0.0111(13) |
| C65 | 0.070(2)   | 0.0336(16) | 0.065(2)   | -0.0009(16) | -0.0205(18) | -0.0029(15) |
| C66 | 0.0497(17) | 0.0315(14) | 0.0483(17) | -0.0030(13) | -0.0226(14) | -0.0102(12) |

The general temperature factor expression:  $\exp(-2\pi^2(a^*U_1h^2 + b^*U_2k^2 + c^*U_3l^2 + 2a^*b^*U_{12}hk +$

$$2a^*c*U_{13hl} + 2b^*c*U_{23kl})$$

**Table S4-4.** Bond lengths (Å)

| atom | atom | distance   | atom | atom | distance   |
|------|------|------------|------|------|------------|
| Ni1  | Si1  | 2.2952(7)  | Ni1  | Si4  | 2.2917(7)  |
| Ni1  | C49  | 1.944(2)   | Ni1  | C58  | 1.919(2)   |
| Si1  | Si2  | 2.3939(9)  | Si1  | C1   | 1.915(3)   |
| Si1  | C7   | 1.905(3)   | Si2  | Si3  | 2.3517(10) |
| Si2  | C13  | 1.896(3)   | Si2  | C19  | 1.895(3)   |
| Si3  | Si4  | 2.3752(10) | Si3  | C25  | 1.893(2)   |
| Si3  | C31  | 1.892(3)   | Si4  | C37  | 1.900(3)   |
| Si4  | C43  | 1.911(2)   | N1   | C49  | 1.352(4)   |
| N1   | C50  | 1.395(4)   | N1   | C52  | 1.442(5)   |
| N2   | C49  | 1.360(4)   | N2   | C51  | 1.401(3)   |
| N2   | C57  | 1.432(5)   | N3   | C58  | 1.354(4)   |
| N3   | C59  | 1.388(3)   | N3   | C61  | 1.443(4)   |
| N4   | C58  | 1.350(3)   | N4   | C60  | 1.392(3)   |
| N4   | C66  | 1.441(4)   | C1   | C2   | 1.377(5)   |
| C1   | C6   | 1.393(3)   | C2   | C3   | 1.384(6)   |
| C3   | C4   | 1.363(5)   | C4   | C5   | 1.360(7)   |
| C5   | C6   | 1.371(5)   | C7   | C8   | 1.391(4)   |
| C7   | C12  | 1.386(5)   | C8   | C9   | 1.378(4)   |
| C9   | C10  | 1.372(6)   | C10  | C11  | 1.379(5)   |
| C11  | C12  | 1.377(5)   | C13  | C14  | 1.384(4)   |
| C13  | C18  | 1.388(3)   | C14  | C15  | 1.378(5)   |
| C15  | C16  | 1.377(4)   | C16  | C17  | 1.370(5)   |
| C17  | C18  | 1.398(5)   | C19  | C20  | 1.387(4)   |
| C19  | C24  | 1.371(5)   | C20  | C21  | 1.378(5)   |
| C21  | C22  | 1.350(6)   | C22  | C23  | 1.351(6)   |
| C23  | C24  | 1.387(5)   | C25  | C26  | 1.387(4)   |
| C25  | C30  | 1.390(3)   | C26  | C27  | 1.381(4)   |
| C27  | C28  | 1.369(4)   | C28  | C29  | 1.360(4)   |
| C29  | C30  | 1.381(4)   | C31  | C32  | 1.378(5)   |
| C31  | C36  | 1.358(4)   | C32  | C33  | 1.386(7)   |
| C33  | C34  | 1.339(5)   | C34  | C35  | 1.369(7)   |
| C35  | C36  | 1.379(7)   | C37  | C38  | 1.379(4)   |
| C37  | C42  | 1.399(4)   | C38  | C39  | 1.381(6)   |
| C39  | C40  | 1.378(6)   | C40  | C41  | 1.366(7)   |
| C41  | C42  | 1.382(5)   | C43  | C44  | 1.389(4)   |

|     |     |          |     |     |          |
|-----|-----|----------|-----|-----|----------|
| C43 | C48 | 1.385(5) | C44 | C45 | 1.380(4) |
| C45 | C46 | 1.368(6) | C46 | C47 | 1.363(6) |
| C47 | C48 | 1.384(4) | C50 | C51 | 1.325(6) |
| C50 | C53 | 1.501(5) | C51 | C55 | 1.493(5) |
| C53 | C54 | 1.502(6) | C55 | C56 | 1.515(5) |
| C59 | C60 | 1.330(5) | C59 | C62 | 1.494(5) |
| C60 | C64 | 1.489(4) | C62 | C63 | 1.508(4) |
| C64 | C65 | 1.508(5) |     |     |          |

**Table S4-5.** Bond angles ( $^{\circ}$ )

| atom | atom | atom | angle      | atom | atom | atom | angle      |
|------|------|------|------------|------|------|------|------------|
| Si1  | Ni1  | Si4  | 91.18(2)   | Si1  | Ni1  | C49  | 90.74(7)   |
| Si1  | Ni1  | C58  | 169.05(9)  | Si4  | Ni1  | C49  | 170.31(10) |
| Si4  | Ni1  | C58  | 87.62(7)   | C49  | Ni1  | C58  | 92.26(9)   |
| Ni1  | Si1  | Si2  | 117.89(3)  | Ni1  | Si1  | C1   | 112.10(8)  |
| Ni1  | Si1  | C7   | 114.21(7)  | Si2  | Si1  | C1   | 103.95(7)  |
| Si2  | Si1  | C7   | 105.55(8)  | C1   | Si1  | C7   | 101.39(12) |
| Si1  | Si2  | Si3  | 96.95(3)   | Si1  | Si2  | C13  | 113.38(9)  |
| Si1  | Si2  | C19  | 114.06(8)  | Si3  | Si2  | C13  | 110.56(8)  |
| Si3  | Si2  | C19  | 118.65(10) | C13  | Si2  | C19  | 103.64(11) |
| Si2  | Si3  | Si4  | 94.56(4)   | Si2  | Si3  | C25  | 116.44(8)  |
| Si2  | Si3  | C31  | 111.67(8)  | Si4  | Si3  | C25  | 118.16(9)  |
| Si4  | Si3  | C31  | 111.37(8)  | C25  | Si3  | C31  | 104.73(13) |
| Ni1  | Si4  | Si3  | 112.71(3)  | Ni1  | Si4  | C37  | 117.49(9)  |
| Ni1  | Si4  | C43  | 112.71(7)  | Si3  | Si4  | C37  | 102.02(9)  |
| Si3  | Si4  | C43  | 107.98(9)  | C37  | Si4  | C43  | 102.83(11) |
| C49  | N1   | C50  | 112.0(3)   | C49  | N1   | C52  | 123.8(2)   |
| C50  | N1   | C52  | 124.2(3)   | C49  | N2   | C51  | 111.3(3)   |
| C49  | N2   | C57  | 124.6(2)   | C51  | N2   | C57  | 124.0(2)   |
| C58  | N3   | C59  | 111.9(2)   | C58  | N3   | C61  | 124.2(2)   |
| C59  | N3   | C61  | 124.0(2)   | C58  | N4   | C60  | 112.3(2)   |
| C58  | N4   | C66  | 123.1(2)   | C60  | N4   | C66  | 124.6(2)   |
| Si1  | C1   | C2   | 123.11(19) | Si1  | C1   | C6   | 120.9(2)   |
| C2   | C1   | C6   | 115.8(3)   | C1   | C2   | C3   | 122.5(3)   |
| C2   | C3   | C4   | 119.5(4)   | C3   | C4   | C5   | 119.9(4)   |
| C4   | C5   | C6   | 120.2(3)   | C1   | C6   | C5   | 122.1(3)   |
| Si1  | C7   | C8   | 119.2(2)   | Si1  | C7   | C12  | 124.5(2)   |
| C8   | C7   | C12  | 116.2(3)   | C7   | C8   | C9   | 122.6(3)   |
| C8   | C9   | C10  | 119.7(3)   | C9   | C10  | C11  | 119.4(3)   |

|     |     |     |            |     |     |     |            |
|-----|-----|-----|------------|-----|-----|-----|------------|
| C10 | C11 | C12 | 120.2(4)   | C7  | C12 | C11 | 122.0(3)   |
| Si2 | C13 | C14 | 120.78(19) | Si2 | C13 | C18 | 121.9(2)   |
| C14 | C13 | C18 | 117.3(3)   | C13 | C14 | C15 | 121.8(3)   |
| C14 | C15 | C16 | 120.3(3)   | C15 | C16 | C17 | 119.5(3)   |
| C16 | C17 | C18 | 120.0(3)   | C13 | C18 | C17 | 121.2(3)   |
| Si2 | C19 | C20 | 119.0(2)   | Si2 | C19 | C24 | 124.5(2)   |
| C20 | C19 | C24 | 116.4(3)   | C19 | C20 | C21 | 121.8(3)   |
| C20 | C21 | C22 | 120.3(3)   | C21 | C22 | C23 | 119.5(4)   |
| C22 | C23 | C24 | 120.7(4)   | C19 | C24 | C23 | 121.4(3)   |
| Si3 | C25 | C26 | 121.58(18) | Si3 | C25 | C30 | 121.02(18) |
| C26 | C25 | C30 | 117.3(2)   | C25 | C26 | C27 | 121.0(2)   |
| C26 | C27 | C28 | 120.4(3)   | C27 | C28 | C29 | 119.8(3)   |
| C28 | C29 | C30 | 120.3(3)   | C25 | C30 | C29 | 121.2(2)   |
| Si3 | C31 | C32 | 122.6(2)   | Si3 | C31 | C36 | 121.1(3)   |
| C32 | C31 | C36 | 116.2(3)   | C31 | C32 | C33 | 121.7(3)   |
| C32 | C33 | C34 | 120.6(4)   | C33 | C34 | C35 | 119.1(4)   |
| C34 | C35 | C36 | 119.7(3)   | C31 | C36 | C35 | 122.7(4)   |
| Si4 | C37 | C38 | 122.5(2)   | Si4 | C37 | C42 | 120.8(2)   |
| C38 | C37 | C42 | 116.7(3)   | C37 | C38 | C39 | 122.7(3)   |
| C38 | C39 | C40 | 119.1(4)   | C39 | C40 | C41 | 119.8(4)   |
| C40 | C41 | C42 | 120.6(3)   | C37 | C42 | C41 | 120.9(3)   |
| Si4 | C43 | C44 | 120.9(2)   | Si4 | C43 | C48 | 122.9(2)   |
| C44 | C43 | C48 | 116.1(2)   | C43 | C44 | C45 | 121.9(3)   |
| C44 | C45 | C46 | 120.4(3)   | C45 | C46 | C47 | 119.2(3)   |
| C46 | C47 | C48 | 120.3(4)   | C43 | C48 | C47 | 122.0(3)   |
| Ni1 | C49 | N1  | 128.1(2)   | Ni1 | C49 | N2  | 128.3(2)   |
| N1  | C49 | N2  | 103.3(2)   | N1  | C50 | C51 | 106.5(3)   |
| N1  | C50 | C53 | 123.0(4)   | C51 | C50 | C53 | 130.4(3)   |
| N2  | C51 | C50 | 106.8(3)   | N2  | C51 | C55 | 122.6(3)   |
| C50 | C51 | C55 | 130.5(3)   | C50 | C53 | C54 | 113.5(3)   |
| C51 | C55 | C56 | 113.3(3)   | Ni1 | C58 | N3  | 128.44(18) |
| Ni1 | C58 | N4  | 128.3(2)   | N3  | C58 | N4  | 103.00(19) |
| N3  | C59 | C60 | 106.8(3)   | N3  | C59 | C62 | 122.5(3)   |
| C60 | C59 | C62 | 130.6(2)   | N4  | C60 | C59 | 106.0(2)   |
| N4  | C60 | C64 | 123.2(3)   | C59 | C60 | C64 | 130.8(3)   |
| C59 | C62 | C63 | 113.2(3)   | C60 | C64 | C65 | 114.5(2)   |

**Table S4-6.** Torsion Angles( $^{\circ}$ )

(Those having bond angles  $> 160$  or  $< 20$  degrees are excluded.)

| atom1 | atom2 | atom3 | atom4 | angle       | atom1 | atom2 | atom3 | atom4 | angle       |
|-------|-------|-------|-------|-------------|-------|-------|-------|-------|-------------|
| Si1   | Ni1   | Si4   | Si3   | 36.87(4)    | Si1   | Ni1   | Si4   | C37   | -81.31(4)   |
| Si1   | Ni1   | Si4   | C43   | 159.41(4)   | Si4   | Ni1   | Si1   | Si2   | -5.36(4)    |
| Si4   | Ni1   | Si1   | C1    | 115.26(4)   | Si4   | Ni1   | Si1   | C7    | -130.15(4)  |
| Si1   | Ni1   | C49   | N1    | 99.60(17)   | Si1   | Ni1   | C49   | N2    | -87.19(17)  |
| C49   | Ni1   | Si1   | Si2   | 165.14(10)  | C49   | Ni1   | Si1   | C1    | -74.24(10)  |
| C49   | Ni1   | Si1   | C7    | 40.35(10)   | Si4   | Ni1   | C58   | N3    | -83.28(17)  |
| Si4   | Ni1   | C58   | N4    | 104.05(18)  | C58   | Ni1   | Si4   | Si3   | -154.01(9)  |
| C58   | Ni1   | Si4   | C37   | 87.81(9)    | C58   | Ni1   | Si4   | C43   | -31.47(9)   |
| C49   | Ni1   | C58   | N3    | 106.41(19)  | C49   | Ni1   | C58   | N4    | -66.2(2)    |
| C58   | Ni1   | C49   | N1    | -69.87(19)  | C58   | Ni1   | C49   | N2    | 103.34(19)  |
| Ni1   | Si1   | Si2   | Si3   | -25.52(5)   | Ni1   | Si1   | Si2   | C13   | 90.47(5)    |
| Ni1   | Si1   | Si2   | C19   | -151.21(4)  | Ni1   | Si1   | C1    | C2    | -28.93(18)  |
| Ni1   | Si1   | C1    | C6    | 156.62(12)  | Ni1   | Si1   | C7    | C8    | -75.56(17)  |
| Ni1   | Si1   | C7    | C12   | 100.27(15)  | Si2   | Si1   | C1    | C2    | 99.46(15)   |
| Si2   | Si1   | C1    | C6    | -74.99(16)  | C1    | Si1   | Si2   | Si3   | -150.28(9)  |
| C1    | Si1   | Si2   | C13   | -34.29(9)   | C1    | Si1   | Si2   | C19   | 84.03(9)    |
| Si2   | Si1   | C7    | C8    | 153.34(13)  | Si2   | Si1   | C7    | C12   | -30.84(18)  |
| C7    | Si1   | Si2   | Si3   | 103.44(9)   | C7    | Si1   | Si2   | C13   | -140.57(9)  |
| C7    | Si1   | Si2   | C19   | -22.25(10)  | C1    | Si1   | C7    | C8    | 45.19(17)   |
| C1    | Si1   | C7    | C12   | -138.98(16) | C7    | Si1   | C1    | C2    | -151.15(16) |
| C7    | Si1   | C1    | C6    | 34.39(18)   | Si1   | Si2   | Si3   | Si4   | 40.73(4)    |
| Si1   | Si2   | Si3   | C25   | 165.38(4)   | Si1   | Si2   | Si3   | C31   | -74.41(4)   |
| Si1   | Si2   | C13   | C14   | 53.85(18)   | Si1   | Si2   | C13   | C18   | -128.77(15) |
| Si1   | Si2   | C19   | C20   | -63.59(18)  | Si1   | Si2   | C19   | C24   | 119.62(16)  |
| Si3   | Si2   | C13   | C14   | 161.49(13)  | Si3   | Si2   | C13   | C18   | -21.13(19)  |
| C13   | Si2   | Si3   | Si4   | -77.48(9)   | C13   | Si2   | Si3   | C25   | 47.16(10)   |
| C13   | Si2   | Si3   | C31   | 167.37(9)   | Si3   | Si2   | C19   | C20   | -176.86(12) |
| Si3   | Si2   | C19   | C24   | 6.4(2)      | C19   | Si2   | Si3   | Si4   | 163.05(9)   |
| C19   | Si2   | Si3   | C25   | -72.31(10)  | C19   | Si2   | Si3   | C31   | 47.90(9)    |
| C13   | Si2   | C19   | C20   | 60.16(18)   | C13   | Si2   | C19   | C24   | -116.64(19) |
| C19   | Si2   | C13   | C14   | -70.34(19)  | C19   | Si2   | C13   | C18   | 107.04(18)  |
| Si2   | Si3   | Si4   | Ni1   | -54.84(4)   | Si2   | Si3   | Si4   | C37   | 72.07(4)    |
| Si2   | Si3   | Si4   | C43   | -180.00(3)  | Si2   | Si3   | C25   | C26   | -148.92(18) |
| Si2   | Si3   | C25   | C30   | 33.7(3)     | Si2   | Si3   | C31   | C32   | -109.85(15) |
| Si2   | Si3   | C31   | C36   | 73.94(17)   | Si4   | Si3   | C25   | C26   | -37.4(3)    |
| Si4   | Si3   | C25   | C30   | 145.19(17)  | C25   | Si3   | Si4   | Ni1   | -178.17(10) |
| C25   | Si3   | Si4   | C37   | -51.25(11)  | C25   | Si3   | Si4   | C43   | 56.68(11)   |
| Si4   | Si3   | C31   | C32   | 145.84(14)  | Si4   | Si3   | C31   | C36   | -30.37(18)  |

|     |     |     |     |             |     |     |     |     |             |
|-----|-----|-----|-----|-------------|-----|-----|-----|-----|-------------|
| C31 | Si3 | Si4 | Ni1 | 60.55(9)    | C31 | Si3 | Si4 | C37 | -172.53(8)  |
| C31 | Si3 | Si4 | C43 | -64.60(9)   | C25 | Si3 | C31 | C32 | 17.01(19)   |
| C25 | Si3 | C31 | C36 | -159.20(16) | C31 | Si3 | C25 | C26 | 87.2(2)     |
| C31 | Si3 | C25 | C30 | -90.2(2)    | Ni1 | Si4 | C37 | C38 | 20.6(2)     |
| Ni1 | Si4 | C37 | C42 | -160.50(13) | Ni1 | Si4 | C43 | C44 | 90.57(15)   |
| Ni1 | Si4 | C43 | C48 | -85.44(16)  | Si3 | Si4 | C37 | C38 | -103.17(18) |
| Si3 | Si4 | C37 | C42 | 75.73(17)   | Si3 | Si4 | C43 | C44 | -144.27(13) |
| Si3 | Si4 | C43 | C48 | 39.72(17)   | C37 | Si4 | C43 | C44 | -36.91(18)  |
| C37 | Si4 | C43 | C48 | 147.08(16)  | C43 | Si4 | C37 | C38 | 144.98(18)  |
| C43 | Si4 | C37 | C42 | -36.1(2)    | C49 | N1  | C50 | C51 | 0.7(3)      |
| C49 | N1  | C50 | C53 | 177.6(2)    | C50 | N1  | C49 | Ni1 | 174.69(19)  |
| C50 | N1  | C49 | N2  | 0.2(3)      | C52 | N1  | C49 | Ni1 | -4.0(4)     |
| C52 | N1  | C49 | N2  | -178.5(2)   | C52 | N1  | C50 | C51 | 179.4(2)    |
| C52 | N1  | C50 | C53 | -3.7(4)     | C49 | N2  | C51 | C50 | 1.5(3)      |
| C49 | N2  | C51 | C55 | -178.9(2)   | C51 | N2  | C49 | Ni1 | -175.51(18) |
| C51 | N2  | C49 | N1  | -1.0(2)     | C57 | N2  | C49 | Ni1 | 8.8(3)      |
| C57 | N2  | C49 | N1  | -176.64(19) | C57 | N2  | C51 | C50 | 177.2(2)    |
| C57 | N2  | C51 | C55 | -3.2(4)     | C58 | N3  | C59 | C60 | 0.1(3)      |
| C58 | N3  | C59 | C62 | -177.80(19) | C59 | N3  | C58 | Ni1 | -173.66(17) |
| C59 | N3  | C58 | N4  | 0.4(2)      | C61 | N3  | C58 | Ni1 | 6.9(3)      |
| C61 | N3  | C58 | N4  | -178.99(19) | C61 | N3  | C59 | C60 | 179.5(2)    |
| C61 | N3  | C59 | C62 | 1.6(4)      | C58 | N4  | C60 | C59 | 0.9(3)      |
| C58 | N4  | C60 | C64 | -178.37(19) | C60 | N4  | C58 | Ni1 | 173.32(18)  |
| C60 | N4  | C58 | N3  | -0.8(2)     | C66 | N4  | C58 | Ni1 | -8.1(3)     |
| C66 | N4  | C58 | N3  | 177.81(19)  | C66 | N4  | C60 | C59 | -177.7(2)   |
| C66 | N4  | C60 | C64 | 3.1(4)      | Si1 | C1  | C2  | C3  | -173.32(15) |
| Si1 | C1  | C6  | C5  | 173.46(15)  | C2  | C1  | C6  | C5  | -1.4(3)     |
| C6  | C1  | C2  | C3  | 1.4(3)      | C1  | C2  | C3  | C4  | -0.2(4)     |
| C2  | C3  | C4  | C5  | -1.1(5)     | C3  | C4  | C5  | C6  | 1.1(5)      |
| C4  | C5  | C6  | C1  | 0.2(4)      | Si1 | C7  | C8  | C9  | 175.02(15)  |
| Si1 | C7  | C12 | C11 | -174.48(15) | C8  | C7  | C12 | C11 | 1.5(3)      |
| C12 | C7  | C8  | C9  | -1.1(3)     | C7  | C8  | C9  | C10 | -0.2(4)     |
| C8  | C9  | C10 | C11 | 1.3(4)      | C9  | C10 | C11 | C12 | -1.0(5)     |
| C10 | C11 | C12 | C7  | -0.4(5)     | Si2 | C13 | C14 | C15 | 177.44(16)  |
| Si2 | C13 | C18 | C17 | -177.73(16) | C14 | C13 | C18 | C17 | -0.3(4)     |
| C18 | C13 | C14 | C15 | -0.1(4)     | C13 | C14 | C15 | C16 | 0.5(4)      |
| C14 | C15 | C16 | C17 | -0.6(4)     | C15 | C16 | C17 | C18 | 0.3(4)      |
| C16 | C17 | C18 | C13 | 0.1(4)      | Si2 | C19 | C20 | C21 | -177.12(18) |
| Si2 | C19 | C24 | C23 | 176.52(18)  | C20 | C19 | C24 | C23 | -0.3(4)     |

|     |     |     |     |            |     |     |     |     |             |
|-----|-----|-----|-----|------------|-----|-----|-----|-----|-------------|
| C24 | C19 | C20 | C21 | -0.1(4)    | C19 | C20 | C21 | C22 | 0.0(5)      |
| C20 | C21 | C22 | C23 | 0.4(5)     | C21 | C22 | C23 | C24 | -0.8(6)     |
| C22 | C23 | C24 | C19 | 0.8(6)     | Si3 | C25 | C26 | C27 | -178.3(2)   |
| Si3 | C25 | C30 | C29 | 177.4(2)   | C26 | C25 | C30 | C29 | -0.1(5)     |
| C30 | C25 | C26 | C27 | -0.8(5)    | C25 | C26 | C27 | C28 | 0.9(5)      |
| C26 | C27 | C28 | C29 | -0.0(6)    | C27 | C28 | C29 | C30 | -0.8(6)     |
| C28 | C29 | C30 | C25 | 0.9(6)     | Si3 | C31 | C32 | C33 | -176.41(18) |
| Si3 | C31 | C36 | C35 | 178.2(2)   | C32 | C31 | C36 | C35 | 1.7(4)      |
| C36 | C31 | C32 | C33 | -0.0(4)    | C31 | C32 | C33 | C34 | -0.8(5)     |
| C32 | C33 | C34 | C35 | -0.1(5)    | C33 | C34 | C35 | C36 | 1.8(5)      |
| C34 | C35 | C36 | C31 | -2.7(6)    | Si4 | C37 | C38 | C39 | -177.75(18) |
| Si4 | C37 | C42 | C41 | 178.69(18) | C38 | C37 | C42 | C41 | -2.3(4)     |
| C42 | C37 | C38 | C39 | 3.3(4)     | C37 | C38 | C39 | C40 | -1.4(5)     |
| C38 | C39 | C40 | C41 | -1.5(6)    | C39 | C40 | C41 | C42 | 2.4(6)      |
| C40 | C41 | C42 | C37 | -0.4(6)    | Si4 | C43 | C44 | C45 | -177.28(14) |
| Si4 | C43 | C48 | C47 | 176.29(16) | C44 | C43 | C48 | C47 | 0.1(4)      |
| C48 | C43 | C44 | C45 | -1.0(3)    | C43 | C44 | C45 | C46 | 1.1(4)      |
| C44 | C45 | C46 | C47 | -0.2(4)    | C45 | C46 | C47 | C48 | -0.7(5)     |
| C46 | C47 | C48 | C43 | 0.8(5)     | N1  | C50 | C51 | N2  | -1.3(3)     |
| N1  | C50 | C51 | C55 | 179.1(2)   | N1  | C50 | C53 | C54 | -78.1(4)    |
| C51 | C50 | C53 | C54 | 98.0(4)    | C53 | C50 | C51 | N2  | -177.9(3)   |
| C53 | C50 | C51 | C55 | 2.5(5)     | N2  | C51 | C55 | C56 | -81.1(4)    |
| C50 | C51 | C55 | C56 | 98.4(4)    | N3  | C59 | C60 | N4  | -0.5(3)     |
| N3  | C59 | C60 | C64 | 178.6(2)   | N3  | C59 | C62 | C63 | 87.3(3)     |
| C60 | C59 | C62 | C63 | -90.0(3)   | C62 | C59 | C60 | N4  | 177.1(2)    |
| C62 | C59 | C60 | C64 | -3.8(5)    | N4  | C60 | C64 | C65 | -78.3(3)    |
| C59 | C60 | C64 | C65 | 102.7(4)   |     |     |     |     |             |

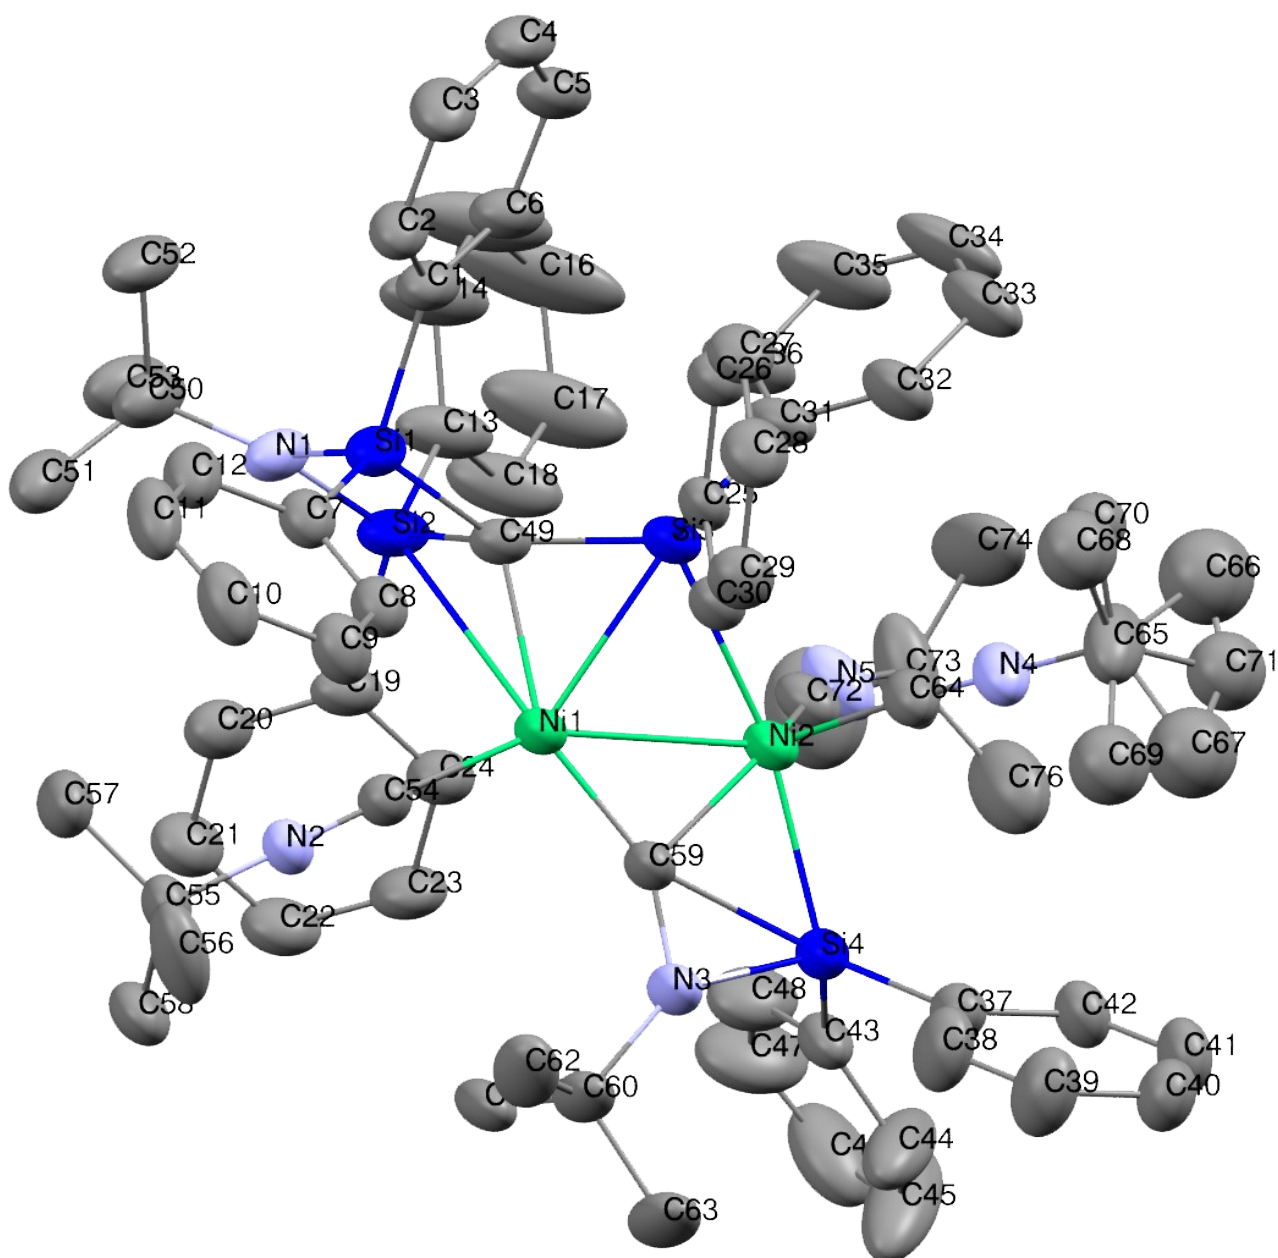

**Figure S8.** ORTEP drawing of **3** (50% probability of the thermal ellipsoids). Hydrogen atoms were omitted for clarity. The unit cell contains two independent molecules of **3**, and one of two molecules was shown here. One *t*Bu group was found to be disordered, and the site occupancy factor for three methyl groups was defined to be 0.5.



**Table S5-1.** Crystal data and structure refinement for **3**.

|                                       |                                                                                                                                                   |
|---------------------------------------|---------------------------------------------------------------------------------------------------------------------------------------------------|
| Empirical Formula                     | C <sub>73</sub> H <sub>85</sub> N <sub>5</sub> Ni <sub>2</sub> Si <sub>4</sub>                                                                    |
| Formula Weight                        | 1262.25                                                                                                                                           |
| Crystal Color, Habit                  | unknown, unknown                                                                                                                                  |
| Crystal Dimensions                    | 0.100 X 0.100 X 0.100 mm                                                                                                                          |
| Crystal System                        | triclinic                                                                                                                                         |
| Lattice Type                          | Primitive                                                                                                                                         |
| Lattice Parameters                    | a = 14.392(12) Å<br>b = 22.272(19) Å<br>c = 22.510(19) Å<br>α = 97.750(7) °<br>β = 95.438(7) °<br>γ = 102.855(7) °<br>V = 6912(10) Å <sup>3</sup> |
| Space Group                           | P-1 (#2)                                                                                                                                          |
| Z value                               | 4                                                                                                                                                 |
| D <sub>calc</sub>                     | 1.213 g/cm <sup>3</sup>                                                                                                                           |
| F <sub>000</sub>                      | 2680.00                                                                                                                                           |
| Diffractometer                        | R-AXIS IV                                                                                                                                         |
| unknown Radiation (λ = 0.41500Å)      | monochromated                                                                                                                                     |
| Voltage, Current                      | 8kV, 100mA                                                                                                                                        |
| Temperature                           | -173.0°C                                                                                                                                          |
| Detector Aperture                     | 300.0 x 300.0 mm                                                                                                                                  |
| Data Images                           | 1080 exposures                                                                                                                                    |
| ω oscillation Range (χ=45.0, φ=0.0)   | 0.0 - 180.0°                                                                                                                                      |
| Exposure Rate                         | 240.0 sec./°                                                                                                                                      |
| Detector Swing Angle                  | 25.0°                                                                                                                                             |
| ω oscillation Range (χ=45.0, φ=90.0)  | 0.0 - 180.0°                                                                                                                                      |
| Exposure Rate                         | 240.0 sec./°                                                                                                                                      |
| Detector Swing Angle                  | 25.0°                                                                                                                                             |
| ω oscillation Range (χ=45.0, φ=180.0) | 0.0 - 180.0°                                                                                                                                      |
| Exposure Rate                         | 240.0 sec./°                                                                                                                                      |
| Detector Swing Angle                  | 25.0°                                                                                                                                             |
| Detector Position                     | 130.00 mm                                                                                                                                         |
| Pixel Size                            | 0.172 mm                                                                                                                                          |
| 2θ <sub>max</sub>                     | 44.5°                                                                                                                                             |
| No. of Reflections Measured           | Total: 282646                                                                                                                                     |

|                                       |                                                                                                                      |
|---------------------------------------|----------------------------------------------------------------------------------------------------------------------|
| Corrections                           | Unique: 67846 ( $R_{\text{int}} = 0.1469$ )<br>Lorentz-polarization<br>Absorption<br>(trans. factors: 0.374 - 1.000) |
| Structure Solution                    | Direct Methods (SHELXT Version 2014/5)                                                                               |
| Refinement                            | Full-matrix least-squares on $F^2$                                                                                   |
| Function Minimized                    | $\Sigma w (F_o^2 - F_c^2)^2$                                                                                         |
| Least Squares Weights                 | $w = 1 / [ \sigma^2(F_o^2) + (0.1152 \cdot P)^2 + 0.0000 \cdot P ]$<br>where $P = (\text{Max}(F_o^2, 0) + 2F_c^2)/3$ |
| $2\theta_{\text{max}}$ cutoff         | 44.5°                                                                                                                |
| Anomalous Dispersion                  | All non-hydrogen atoms                                                                                               |
| No. Observations (All reflections)    | 67846                                                                                                                |
| No. Variables                         | 1542                                                                                                                 |
| Reflection/Parameter Ratio            | 44.00                                                                                                                |
| Residuals: R1 ( $I > 2.00\sigma(I)$ ) | 0.0786                                                                                                               |
| Residuals: R (All reflections)        | 0.1753                                                                                                               |
| Residuals: wR2 (All reflections)      | 0.2544                                                                                                               |
| Goodness of Fit Indicator             | 0.969                                                                                                                |
| Max Shift/Error in Final Cycle        | 0.002                                                                                                                |
| Maximum peak in Final Diff. Map       | 1.36 e <sup>-</sup> /Å <sup>3</sup>                                                                                  |
| Minimum peak in Final Diff. Map       | -1.12 e <sup>-</sup> /Å <sup>3</sup>                                                                                 |

**Table S5-2.** Atomic coordinates and  $B_{\text{iso}}/B_{\text{eq}}$  and occupancy

| atom | x           | y           | z           | $B_{\text{eq}}$ | occ |
|------|-------------|-------------|-------------|-----------------|-----|
| Ni1  | 0.50021(2)  | 0.68428(2)  | 0.78836(2)  | 2.546(6)        | 1   |
| Ni2  | 0.42053(3)  | 0.69257(2)  | 0.69109(2)  | 2.862(6)        | 1   |
| Ni3  | 0.93734(3)  | 0.18490(2)  | 0.78227(2)  | 2.863(6)        | 1   |
| Ni4  | 0.88210(2)  | 0.28040(2)  | 0.77444(2)  | 2.890(6)        | 1   |
| Si1  | 0.68656(6)  | 0.61580(4)  | 0.80872(4)  | 2.928(13)       | 1   |
| Si2  | 0.72334(6)  | 0.72889(4)  | 0.80040(4)  | 3.237(14)       | 1   |
| Si3  | 0.54408(6)  | 0.63582(4)  | 0.69742(3)  | 2.712(12)       | 1   |
| Si4  | 0.29756(6)  | 0.73408(4)  | 0.70823(3)  | 3.223(13)       | 1   |
| Si5  | 1.10420(6)  | 0.13831(4)  | 0.69968(3)  | 2.852(12)       | 1   |
| Si6  | 0.92997(6)  | 0.11498(4)  | 0.65997(4)  | 3.340(14)       | 1   |
| Si7  | 1.01554(6)  | 0.26217(4)  | 0.72682(3)  | 2.705(12)       | 1   |
| Si8  | 0.79822(6)  | 0.29646(4)  | 0.84963(4)  | 3.319(14)       | 1   |
| N1   | 0.77458(17) | 0.68192(12) | 0.84099(13) | 3.45(4)         | 1   |
| N2   | 0.51795(16) | 0.69717(11) | 0.92063(10) | 2.87(4)         | 1   |
| N3   | 0.30976(19) | 0.71873(14) | 0.78213(11) | 3.63(5)         | 1   |
| N4   | 0.3070(2)   | 0.59503(14) | 0.59202(12) | 4.19(5)         | 1   |
| N5   | 0.5267(3)   | 0.79137(13) | 0.63137(12) | 4.51(6)         | 1   |
| N6   | 1.02066(19) | 0.07621(12) | 0.65761(11) | 3.35(4)         | 1   |
| N7   | 0.9662(3)   | 0.08057(14) | 0.84277(15) | 4.78(6)         | 1   |
| N8   | 0.81098(18) | 0.22548(13) | 0.87042(11) | 3.40(4)         | 1   |
| N9   | 0.99023(18) | 0.41134(12) | 0.78728(11) | 3.27(4)         | 1   |
| N10  | 0.7296(2)   | 0.26199(17) | 0.66993(13) | 4.87(7)         | 1   |
| C1   | 0.7309(2)   | 0.55724(14) | 0.75887(14) | 3.28(5)         | 1   |
| C2   | 0.7260(2)   | 0.49742(15) | 0.76935(15) | 3.68(5)         | 1   |
| C3   | 0.7561(3)   | 0.45471(16) | 0.73055(16) | 4.31(6)         | 1   |
| C4   | 0.7900(2)   | 0.47055(17) | 0.67940(17) | 4.30(6)         | 1   |
| C5   | 0.7945(2)   | 0.52877(17) | 0.66684(17) | 4.19(6)         | 1   |
| C6   | 0.7661(2)   | 0.57197(15) | 0.70658(16) | 3.78(6)         | 1   |
| C7   | 0.6226(2)   | 0.56833(13) | 0.86094(13) | 3.10(4)         | 1   |
| C8   | 0.5236(2)   | 0.55117(13) | 0.85227(13) | 3.21(5)         | 1   |
| C9   | 0.4728(3)   | 0.51075(15) | 0.88449(14) | 3.72(5)         | 1   |
| C10  | 0.5204(3)   | 0.48684(16) | 0.92748(15) | 4.42(7)         | 1   |
| C11  | 0.6170(3)   | 0.50299(15) | 0.93762(15) | 4.34(7)         | 1   |
| C12  | 0.6689(3)   | 0.54350(15) | 0.90486(14) | 3.76(5)         | 1   |
| C13  | 0.8068(3)   | 0.76550(15) | 0.7501(2)   | 4.74(8)         | 1   |
| C14  | 0.8762(3)   | 0.73716(18) | 0.7295(2)   | 5.86(11)        | 1   |
| C15  | 0.9336(4)   | 0.7604(2)   | 0.6891(3)   | 8.8(2)          | 1   |

|     |             |             |             |          |   |
|-----|-------------|-------------|-------------|----------|---|
| C16 | 0.9212(5)   | 0.8117(2)   | 0.6662(4)   | 11.6(3)  | 1 |
| C17 | 0.8517(5)   | 0.8417(2)   | 0.6849(3)   | 9.4(2)   | 1 |
| C18 | 0.7972(4)   | 0.81910(17) | 0.7269(2)   | 6.35(12) | 1 |
| C19 | 0.6899(2)   | 0.79609(13) | 0.84460(15) | 3.34(5)  | 1 |
| C20 | 0.7284(2)   | 0.82055(16) | 0.90410(16) | 3.89(6)  | 1 |
| C21 | 0.7041(3)   | 0.87080(17) | 0.93499(18) | 4.46(7)  | 1 |
| C22 | 0.6400(3)   | 0.89758(16) | 0.90832(18) | 4.47(7)  | 1 |
| C23 | 0.6006(3)   | 0.87482(17) | 0.84956(18) | 4.42(7)  | 1 |
| C24 | 0.6246(2)   | 0.82448(15) | 0.81855(16) | 3.70(5)  | 1 |
| C25 | 0.4843(2)   | 0.55100(13) | 0.68951(11) | 2.79(4)  | 1 |
| C26 | 0.5247(2)   | 0.50481(14) | 0.66384(13) | 3.16(5)  | 1 |
| C27 | 0.4804(3)   | 0.44315(14) | 0.65822(15) | 3.67(5)  | 1 |
| C28 | 0.3927(3)   | 0.42530(15) | 0.67747(15) | 3.91(6)  | 1 |
| C29 | 0.3509(2)   | 0.46925(15) | 0.70348(15) | 3.60(5)  | 1 |
| C30 | 0.3953(2)   | 0.53126(14) | 0.70901(12) | 3.08(4)  | 1 |
| C31 | 0.5924(2)   | 0.64124(14) | 0.62335(14) | 3.55(5)  | 1 |
| C32 | 0.5426(3)   | 0.60372(18) | 0.57199(15) | 4.45(7)  | 1 |
| C33 | 0.5728(4)   | 0.6041(2)   | 0.51644(17) | 5.58(9)  | 1 |
| C34 | 0.6579(4)   | 0.6447(2)   | 0.5113(2)   | 6.53(12) | 1 |
| C35 | 0.7104(4)   | 0.6826(2)   | 0.5610(2)   | 6.70(13) | 1 |
| C36 | 0.6778(3)   | 0.68156(17) | 0.61749(19) | 4.95(8)  | 1 |
| C37 | 0.1779(2)   | 0.69356(16) | 0.66892(13) | 3.56(5)  | 1 |
| C38 | 0.1172(3)   | 0.6479(2)   | 0.69138(18) | 5.08(8)  | 1 |
| C39 | 0.0289(3)   | 0.6185(2)   | 0.6619(2)   | 5.61(9)  | 1 |
| C40 | -0.0017(3)  | 0.63312(19) | 0.60789(16) | 4.47(7)  | 1 |
| C41 | 0.0570(3)   | 0.67634(18) | 0.58397(15) | 4.39(6)  | 1 |
| C42 | 0.1451(3)   | 0.70614(17) | 0.61393(14) | 3.97(6)  | 1 |
| C43 | 0.3118(3)   | 0.81948(17) | 0.71182(13) | 3.92(6)  | 1 |
| C44 | 0.2358(4)   | 0.8452(3)   | 0.6996(3)   | 7.68(15) | 1 |
| C45 | 0.2526(6)   | 0.9096(3)   | 0.7003(3)   | 10.6(2)  | 1 |
| C46 | 0.3430(6)   | 0.9470(3)   | 0.7136(2)   | 8.02(16) | 1 |
| C47 | 0.4146(5)   | 0.9214(2)   | 0.7303(3)   | 7.74(14) | 1 |
| C48 | 0.3992(3)   | 0.85898(19) | 0.7275(2)   | 5.63(9)  | 1 |
| C49 | 0.62419(19) | 0.66285(13) | 0.76716(12) | 2.79(4)  | 1 |
| C50 | 0.8638(2)   | 0.69145(17) | 0.88211(19) | 4.43(7)  | 1 |
| C51 | 0.8435(3)   | 0.69127(18) | 0.94641(18) | 4.64(7)  | 1 |
| C52 | 0.9127(3)   | 0.63909(19) | 0.8642(2)   | 5.19(8)  | 1 |
| C53 | 0.9323(3)   | 0.75239(18) | 0.8789(2)   | 5.37(9)  | 1 |
| C54 | 0.51286(19) | 0.69233(13) | 0.86933(12) | 2.85(4)  | 1 |

|     |            |             |             |          |     |
|-----|------------|-------------|-------------|----------|-----|
| C55 | 0.5235(2)  | 0.70212(15) | 0.98515(12) | 3.42(5)  | 1   |
| C56 | 0.4430(3)  | 0.6523(2)   | 0.99828(16) | 6.00(10) | 1   |
| C57 | 0.6189(3)  | 0.6937(2)   | 1.00779(16) | 5.26(8)  | 1   |
| C58 | 0.5135(3)  | 0.76519(19) | 1.01045(15) | 4.75(7)  | 1   |
| C59 | 0.3874(2)  | 0.70154(14) | 0.76821(11) | 2.98(4)  | 1   |
| C60 | 0.2803(2)  | 0.7337(2)   | 0.84252(14) | 4.49(7)  | 1   |
| C61 | 0.3541(3)  | 0.7871(2)   | 0.87788(14) | 4.73(8)  | 1   |
| C62 | 0.2677(3)  | 0.6764(2)   | 0.87118(17) | 5.22(9)  | 1   |
| C63 | 0.1855(3)  | 0.7519(3)   | 0.83226(19) | 7.04(14) | 1   |
| C64 | 0.3531(2)  | 0.63151(15) | 0.63039(13) | 3.48(5)  | 1   |
| C65 | 0.2493(4)  | 0.5488(2)   | 0.5442(2)   | 5.90(10) | 1   |
| C66 | 0.2922(10) | 0.5811(6)   | 0.4840(6)   | 8.4(3)   | 1/2 |
| C67 | 0.1501(9)  | 0.5497(6)   | 0.5347(6)   | 7.5(2)   | 1/2 |
| C68 | 0.2710(8)  | 0.4861(5)   | 0.5497(5)   | 5.9(2)   | 1/2 |
| C69 | 0.1484(7)  | 0.5250(5)   | 0.5771(5)   | 6.04(18) | 1/2 |
| C70 | 0.2919(5)  | 0.4963(3)   | 0.5345(3)   | 3.64(11) | 1/2 |
| C71 | 0.2184(7)  | 0.5779(5)   | 0.4973(4)   | 5.76(17) | 1/2 |
| C72 | 0.4906(3)  | 0.75250(14) | 0.65518(13) | 3.51(5)  | 1   |
| C73 | 0.5502(4)  | 0.8361(2)   | 0.59201(18) | 6.60(12) | 1   |
| C74 | 0.5821(4)  | 0.8056(3)   | 0.5392(2)   | 7.97(16) | 1   |
| C75 | 0.6058(5)  | 0.8940(3)   | 0.6297(3)   | 9.38(18) | 1   |
| C76 | 0.4525(5)  | 0.8539(3)   | 0.5706(2)   | 7.46(13) | 1   |
| C77 | 1.1975(2)  | 0.17532(15) | 0.65584(13) | 3.37(5)  | 1   |
| C78 | 1.2831(2)  | 0.21311(16) | 0.68510(14) | 3.64(5)  | 1   |
| C79 | 1.3490(3)  | 0.24668(18) | 0.65443(17) | 4.47(7)  | 1   |
| C80 | 1.3303(3)  | 0.2441(2)   | 0.59373(18) | 5.00(8)  | 1   |
| C81 | 1.2462(3)  | 0.2070(2)   | 0.56292(16) | 4.93(8)  | 1   |
| C82 | 1.1809(3)  | 0.17252(17) | 0.59349(14) | 4.04(6)  | 1   |
| C83 | 1.1787(2)  | 0.12561(14) | 0.76661(13) | 3.41(5)  | 1   |
| C84 | 1.2423(3)  | 0.08748(17) | 0.76287(16) | 4.48(7)  | 1   |
| C85 | 1.3028(3)  | 0.0835(2)   | 0.81145(19) | 5.81(10) | 1   |
| C86 | 1.3023(4)  | 0.1176(2)   | 0.86623(18) | 5.81(10) | 1   |
| C87 | 1.2434(3)  | 0.15671(18) | 0.87162(16) | 4.97(8)  | 1   |
| C88 | 1.1811(3)  | 0.16045(15) | 0.82285(13) | 3.63(5)  | 1   |
| C89 | 0.8814(3)  | 0.12739(17) | 0.58446(15) | 4.10(6)  | 1   |
| C90 | 0.9333(3)  | 0.17062(18) | 0.55546(16) | 4.83(7)  | 1   |
| C91 | 0.9029(4)  | 0.1778(2)   | 0.49747(19) | 6.23(11) | 1   |
| C92 | 0.8172(5)  | 0.1414(3)   | 0.4682(2)   | 7.38(15) | 1   |
| C93 | 0.7646(4)  | 0.0992(3)   | 0.4960(2)   | 6.73(12) | 1   |

|      |             |              |             |          |   |
|------|-------------|--------------|-------------|----------|---|
| C94  | 0.7951(3)   | 0.0914(2)    | 0.55260(18) | 5.35(9)  | 1 |
| C95  | 0.8212(3)   | 0.07665(18)  | 0.69218(17) | 4.62(7)  | 1 |
| C96  | 0.8117(3)   | 0.0233(2)    | 0.7180(2)   | 5.90(10) | 1 |
| C97  | 0.7334(5)   | 0.0004(3)    | 0.7452(3)   | 8.67(19) | 1 |
| C98  | 0.6602(5)   | 0.0317(5)    | 0.7467(3)   | 11.0(3)  | 1 |
| C99  | 0.6672(3)   | 0.0836(4)    | 0.7217(3)   | 9.4(2)   | 1 |
| C100 | 0.7464(3)   | 0.1073(3)    | 0.6939(2)   | 6.21(11) | 1 |
| C101 | 1.12561(19) | 0.30401(12)  | 0.78090(12) | 2.67(4)  | 1 |
| C102 | 1.2091(2)   | 0.33843(13)  | 0.76563(13) | 2.94(4)  | 1 |
| C103 | 1.2865(2)   | 0.36827(14)  | 0.80792(14) | 3.31(5)  | 1 |
| C104 | 1.2821(2)   | 0.36473(14)  | 0.86766(14) | 3.27(5)  | 1 |
| C105 | 1.2004(2)   | 0.33076(13)  | 0.88481(13) | 3.03(4)  | 1 |
| C106 | 1.12379(19) | 0.30121(13)  | 0.84208(11) | 2.69(4)  | 1 |
| C107 | 1.0231(2)   | 0.30547(14)  | 0.66074(12) | 3.51(5)  | 1 |
| C108 | 0.9616(3)   | 0.33985(18)  | 0.64257(15) | 4.56(7)  | 1 |
| C109 | 0.9755(4)   | 0.3724(2)    | 0.59499(18) | 6.35(11) | 1 |
| C110 | 1.0520(4)   | 0.3705(2)    | 0.56450(17) | 6.50(12) | 1 |
| C111 | 1.1133(4)   | 0.3365(2)    | 0.58079(16) | 5.51(9)  | 1 |
| C112 | 1.0994(3)   | 0.30435(16)  | 0.62817(14) | 4.13(6)  | 1 |
| C113 | 0.8550(2)   | 0.35659(16)  | 0.91550(14) | 3.68(5)  | 1 |
| C114 | 0.9523(2)   | 0.36939(16)  | 0.93122(14) | 3.81(5)  | 1 |
| C115 | 0.9968(3)   | 0.40805(18)  | 0.98392(16) | 4.40(6)  | 1 |
| C116 | 0.9420(3)   | 0.4351(2)    | 1.02056(17) | 5.16(8)  | 1 |
| C117 | 0.8464(3)   | 0.4239(2)    | 1.00566(17) | 5.47(9)  | 1 |
| C118 | 0.8024(3)   | 0.38452(19)  | 0.95369(16) | 4.73(7)  | 1 |
| C119 | 0.6691(2)   | 0.29403(16)  | 0.83270(14) | 3.62(5)  | 1 |
| C120 | 0.6390(3)   | 0.34844(18)  | 0.83109(16) | 4.22(6)  | 1 |
| C121 | 0.5442(3)   | 0.3471(2)    | 0.81820(18) | 4.71(7)  | 1 |
| C122 | 0.4779(3)   | 0.2916(2)    | 0.80647(18) | 5.08(8)  | 1 |
| C123 | 0.5054(3)   | 0.2375(2)    | 0.8063(2)   | 5.36(9)  | 1 |
| C124 | 0.6013(2)   | 0.23887(18)  | 0.81895(17) | 4.25(6)  | 1 |
| C125 | 1.0110(2)   | 0.18087(13)  | 0.71038(11) | 2.90(4)  | 1 |
| C126 | 1.0259(3)   | 0.01487(16)  | 0.62760(16) | 4.29(6)  | 1 |
| C127 | 1.1104(3)   | 0.02009(19)  | 0.59217(18) | 5.23(8)  | 1 |
| C128 | 1.0382(3)   | -0.02609(17) | 0.67426(19) | 5.32(8)  | 1 |
| C129 | 0.9353(3)   | -0.01522(19) | 0.58544(18) | 5.33(8)  | 1 |
| C130 | 0.9537(2)   | 0.12043(15)  | 0.81827(15) | 3.77(6)  | 1 |
| C131 | 0.9833(4)   | 0.0319(2)    | 0.8757(2)   | 6.09(11) | 1 |
| C132 | 0.8888(5)   | -0.0103(3)   | 0.8788(5)   | 12.5(3)  | 1 |

|      |             |             |             |          |     |
|------|-------------|-------------|-------------|----------|-----|
| C133 | 1.0330(6)   | 0.0634(3)   | 0.9377(2)   | 9.21(19) | 1   |
| C134 | 1.0452(4)   | -0.0018(2)  | 0.8421(2)   | 6.84(12) | 1   |
| C135 | 0.86380(19) | 0.22253(14) | 0.82646(12) | 3.04(4)  | 1   |
| C136 | 0.7991(3)   | 0.18703(17) | 0.91824(14) | 4.11(6)  | 1   |
| C137 | 0.7328(4)   | 0.2128(2)   | 0.95799(18) | 5.77(9)  | 1   |
| C138 | 0.8958(3)   | 0.1937(2)   | 0.95385(16) | 4.72(7)  | 1   |
| C139 | 0.7532(3)   | 0.12143(19) | 0.89001(17) | 4.68(7)  | 1   |
| C140 | 0.9498(2)   | 0.36049(15) | 0.78298(12) | 3.14(5)  | 1   |
| C141 | 1.0539(2)   | 0.47178(14) | 0.79273(14) | 3.40(5)  | 1   |
| C142 | 1.1328(2)   | 0.47641(16) | 0.84272(17) | 4.09(6)  | 1   |
| C143 | 0.9971(3)   | 0.51934(16) | 0.80747(17) | 4.07(6)  | 1   |
| C144 | 1.0917(3)   | 0.47738(18) | 0.73352(17) | 4.56(7)  | 1   |
| C145 | 0.7890(2)   | 0.26711(17) | 0.70875(14) | 3.94(6)  | 1   |
| C146 | 0.6583(3)   | 0.2564(2)   | 0.61932(18) | 5.64(10) | 1   |
| C147 | 0.7123(4)   | 0.2621(4)   | 0.5645(2)   | 8.62(18) | 1   |
| C148 | 0.5878(4)   | 0.1967(3)   | 0.6135(3)   | 8.66(18) | 1   |
| C149 | 0.6126(3)   | 0.3096(2)   | 0.6301(2)   | 6.07(10) | 1   |
| C150 | 1.2075(7)   | -0.0353(5)  | 0.9622(5)   | 6.19(19) | 1/2 |
| C151 | 1.2785(7)   | -0.0525(5)  | 0.9247(5)   | 6.01(18) | 1/2 |
| C152 | 1.3632(4)   | -0.0038(3)  | 0.9353(3)   | 3.48(10) | 1/2 |
| C153 | 1.4300(7)   | -0.0199(5)  | 0.9000(4)   | 5.70(17) | 1/2 |
| C154 | 1.5089(8)   | 0.0322(5)   | 0.9060(5)   | 6.6(2)   | 1/2 |
| C155 | 0.4693(9)   | 0.0314(6)   | 0.5671(6)   | 7.6(2)   | 1/2 |
| C156 | 0.4645(7)   | 0.0178(5)   | 0.5114(5)   | 5.88(18) | 1/2 |
| C157 | 0.3927(13)  | 0.0664(9)   | 0.5924(9)   | 5.7(3)   | 1/4 |

$$B_{eq} = 8/3 \pi^2 (U_{11}(aa^*)^2 + U_{22}(bb^*)^2 + U_{33}(cc^*)^2 + 2U_{12}(aa^*bb^*)\cos \gamma + 2U_{13}(aa^*cc^*)\cos \beta + 2U_{23}(bb^*cc^*)\cos \alpha)$$

**Table S5-3.** Anisotropic displacement parameters

| atom | U <sub>11</sub> | U <sub>22</sub> | U <sub>33</sub> | U <sub>12</sub> | U <sub>13</sub> | U <sub>23</sub> |
|------|-----------------|-----------------|-----------------|-----------------|-----------------|-----------------|
| Ni1  | 0.03555(16)     | 0.03891(18)     | 0.02749(14)     | 0.01495(13)     | 0.01062(12)     | 0.00884(12)     |
| Ni2  | 0.04681(19)     | 0.04258(19)     | 0.02655(15)     | 0.02060(15)     | 0.01182(13)     | 0.00916(13)     |
| Ni3  | 0.03989(18)     | 0.03602(18)     | 0.03138(16)     | 0.00605(14)     | 0.01072(13)     | 0.00096(13)     |
| Ni4  | 0.03542(17)     | 0.04223(19)     | 0.02937(16)     | 0.00911(14)     | 0.00218(12)     | -0.00242(13)    |
| Si1  | 0.0365(4)       | 0.0342(4)       | 0.0427(4)       | 0.0130(3)       | 0.0074(3)       | 0.0045(3)       |
| Si2  | 0.0365(4)       | 0.0325(4)       | 0.0564(5)       | 0.0104(3)       | 0.0175(3)       | 0.0040(3)       |
| Si3  | 0.0414(4)       | 0.0364(4)       | 0.0312(3)       | 0.0148(3)       | 0.0156(3)       | 0.0100(3)       |
| Si4  | 0.0465(4)       | 0.0551(5)       | 0.0293(3)       | 0.0262(4)       | 0.0082(3)       | 0.0104(3)       |
| Si5  | 0.0424(4)       | 0.0371(4)       | 0.0284(3)       | 0.0089(3)       | 0.0088(3)       | 0.0018(3)       |

|     |            |            |            |            |             |             |
|-----|------------|------------|------------|------------|-------------|-------------|
| Si6 | 0.0445(4)  | 0.0404(4)  | 0.0369(4)  | 0.0066(3)  | 0.0051(3)   | -0.0057(3)  |
| Si7 | 0.0401(4)  | 0.0359(4)  | 0.0257(3)  | 0.0079(3)  | 0.0059(3)   | 0.0020(3)   |
| Si8 | 0.0372(4)  | 0.0504(5)  | 0.0350(4)  | 0.0112(3)  | 0.0050(3)   | -0.0066(3)  |
| N1  | 0.0321(11) | 0.0391(13) | 0.0593(15) | 0.0116(9)  | 0.0042(10)  | 0.0017(11)  |
| N2  | 0.0399(11) | 0.0402(12) | 0.0295(10) | 0.0101(9)  | 0.0052(8)   | 0.0059(9)   |
| N3  | 0.0489(13) | 0.0709(18) | 0.0298(11) | 0.0310(13) | 0.0136(10)  | 0.0154(11)  |
| N4  | 0.0710(18) | 0.0550(16) | 0.0383(13) | 0.0312(15) | 0.0005(12)  | 0.0036(12)  |
| N5  | 0.098(2)   | 0.0376(14) | 0.0376(13) | 0.0139(14) | 0.0224(14)  | 0.0088(11)  |
| N6  | 0.0521(14) | 0.0371(12) | 0.0355(11) | 0.0100(10) | 0.0068(10)  | -0.0036(9)  |
| N7  | 0.077(2)   | 0.0459(16) | 0.0673(19) | 0.0153(15) | 0.0310(17)  | 0.0210(14)  |
| N8  | 0.0415(12) | 0.0537(15) | 0.0334(11) | 0.0110(11) | 0.0116(9)   | 0.0007(10)  |
| N9  | 0.0443(13) | 0.0402(13) | 0.0402(12) | 0.0165(11) | -0.0007(10) | 0.0018(10)  |
| N10 | 0.0496(15) | 0.083(2)   | 0.0455(15) | 0.0257(15) | -0.0096(12) | -0.0193(14) |
| C1  | 0.0400(14) | 0.0387(14) | 0.0484(15) | 0.0173(11) | 0.0067(12)  | 0.0015(12)  |
| C2  | 0.0535(17) | 0.0428(16) | 0.0452(16) | 0.0216(14) | -0.0006(13) | 0.0002(12)  |
| C3  | 0.068(2)   | 0.0414(17) | 0.0554(19) | 0.0256(16) | -0.0011(16) | -0.0020(14) |
| C4  | 0.0494(17) | 0.0531(19) | 0.061(2)   | 0.0246(15) | 0.0051(15)  | -0.0086(16) |
| C5  | 0.0471(17) | 0.056(2)   | 0.0589(19) | 0.0194(15) | 0.0177(15)  | 0.0001(15)  |
| C6  | 0.0442(15) | 0.0440(16) | 0.0599(19) | 0.0169(13) | 0.0184(14)  | 0.0055(14)  |
| C7  | 0.0494(15) | 0.0322(13) | 0.0367(13) | 0.0114(11) | 0.0042(11)  | 0.0052(10)  |
| C8  | 0.0520(16) | 0.0353(13) | 0.0356(13) | 0.0115(12) | 0.0055(11)  | 0.0069(10)  |
| C9  | 0.0559(17) | 0.0413(16) | 0.0402(15) | 0.0034(13) | 0.0048(13)  | 0.0080(12)  |
| C10 | 0.081(2)   | 0.0423(17) | 0.0388(15) | 0.0028(16) | 0.0020(16)  | 0.0111(13)  |
| C11 | 0.084(3)   | 0.0394(16) | 0.0382(15) | 0.0139(16) | -0.0093(15) | 0.0094(12)  |
| C12 | 0.0590(18) | 0.0392(15) | 0.0443(16) | 0.0169(14) | -0.0027(13) | 0.0034(12)  |
| C13 | 0.0541(18) | 0.0327(14) | 0.092(3)   | 0.0024(13) | 0.0414(19)  | -0.0027(16) |
| C14 | 0.057(2)   | 0.0464(19) | 0.117(4)   | 0.0022(16) | 0.052(2)    | -0.005(2)   |
| C15 | 0.098(3)   | 0.046(2)   | 0.192(6)   | -0.001(2)  | 0.107(4)    | -0.005(3)   |
| C16 | 0.186(6)   | 0.052(3)   | 0.219(8)   | 0.006(3)   | 0.173(7)    | 0.016(4)    |
| C17 | 0.159(5)   | 0.047(2)   | 0.168(6)   | 0.013(3)   | 0.123(5)    | 0.024(3)    |
| C18 | 0.101(3)   | 0.0336(17) | 0.115(4)   | 0.0098(19) | 0.072(3)    | 0.012(2)    |
| C19 | 0.0387(13) | 0.0331(13) | 0.0570(17) | 0.0097(11) | 0.0175(12)  | 0.0041(12)  |
| C20 | 0.0434(15) | 0.0437(16) | 0.0594(19) | 0.0115(13) | 0.0068(14)  | 0.0024(14)  |
| C21 | 0.062(2)   | 0.0447(18) | 0.059(2)   | 0.0132(15) | 0.0088(16)  | -0.0052(15) |
| C22 | 0.063(2)   | 0.0430(17) | 0.067(2)   | 0.0194(16) | 0.0193(18)  | 0.0006(15)  |
| C23 | 0.0579(19) | 0.0525(19) | 0.068(2)   | 0.0306(16) | 0.0179(17)  | 0.0113(17)  |
| C24 | 0.0502(16) | 0.0449(16) | 0.0504(17) | 0.0187(13) | 0.0137(13)  | 0.0070(13)  |
| C25 | 0.0419(13) | 0.0402(14) | 0.0264(10) | 0.0121(11) | 0.0080(10)  | 0.0081(9)   |
| C26 | 0.0451(14) | 0.0407(14) | 0.0373(13) | 0.0140(12) | 0.0101(11)  | 0.0072(11)  |



|     |            |            |            |            |             |             |
|-----|------------|------------|------------|------------|-------------|-------------|
| C27 | 0.0594(18) | 0.0360(14) | 0.0474(16) | 0.0186(13) | 0.0090(14)  | 0.0047(12)  |
| C28 | 0.0616(19) | 0.0343(14) | 0.0520(17) | 0.0091(13) | 0.0078(15)  | 0.0087(13)  |
| C29 | 0.0481(16) | 0.0429(16) | 0.0474(16) | 0.0076(13) | 0.0131(13)  | 0.0129(13)  |
| C30 | 0.0436(14) | 0.0437(15) | 0.0335(12) | 0.0134(12) | 0.0110(11)  | 0.0097(11)  |
| C31 | 0.0641(18) | 0.0442(15) | 0.0414(14) | 0.0287(14) | 0.0280(14)  | 0.0168(12)  |
| C32 | 0.080(2)   | 0.064(2)   | 0.0379(15) | 0.0303(19) | 0.0261(16)  | 0.0155(14)  |
| C33 | 0.114(3)   | 0.076(3)   | 0.0419(17) | 0.047(3)   | 0.038(2)    | 0.0184(17)  |
| C34 | 0.145(4)   | 0.063(2)   | 0.066(2)   | 0.044(3)   | 0.075(3)    | 0.025(2)    |
| C35 | 0.122(4)   | 0.055(2)   | 0.096(3)   | 0.024(2)   | 0.081(3)    | 0.028(2)    |
| C36 | 0.083(3)   | 0.0469(18) | 0.069(2)   | 0.0176(17) | 0.050(2)    | 0.0159(16)  |
| C37 | 0.0500(16) | 0.0582(18) | 0.0347(13) | 0.0244(14) | 0.0087(12)  | 0.0130(12)  |
| C38 | 0.064(2)   | 0.082(3)   | 0.052(2)   | 0.016(2)   | -0.0001(17) | 0.0335(19)  |
| C39 | 0.061(2)   | 0.086(3)   | 0.066(2)   | 0.009(2)   | 0.0001(19)  | 0.036(2)    |
| C40 | 0.0528(18) | 0.071(2)   | 0.0483(18) | 0.0188(17) | -0.0008(14) | 0.0161(16)  |
| C41 | 0.069(2)   | 0.065(2)   | 0.0346(14) | 0.0181(18) | 0.0007(14)  | 0.0143(14)  |
| C42 | 0.0600(19) | 0.062(2)   | 0.0323(13) | 0.0183(16) | 0.0064(13)  | 0.0122(13)  |
| C43 | 0.070(2)   | 0.0570(19) | 0.0306(13) | 0.0362(17) | 0.0046(13)  | 0.0032(12)  |
| C44 | 0.103(4)   | 0.080(3)   | 0.102(4)   | 0.061(3)   | -0.044(3)   | -0.034(3)   |
| C45 | 0.167(6)   | 0.075(4)   | 0.144(6)   | 0.071(4)   | -0.084(5)   | -0.037(4)   |
| C46 | 0.183(7)   | 0.056(3)   | 0.064(3)   | 0.036(4)   | 0.009(4)    | -0.001(2)   |
| C47 | 0.110(4)   | 0.051(2)   | 0.131(5)   | 0.023(3)   | 0.038(4)    | -0.013(3)   |
| C48 | 0.073(3)   | 0.047(2)   | 0.093(3)   | 0.0211(19) | 0.018(2)    | -0.008(2)   |
| C49 | 0.0345(12) | 0.0355(13) | 0.0404(13) | 0.0126(10) | 0.0145(10)  | 0.0082(10)  |
| C50 | 0.0362(15) | 0.0500(19) | 0.077(2)   | 0.0153(13) | -0.0033(14) | -0.0095(16) |
| C51 | 0.0513(18) | 0.052(2)   | 0.068(2)   | 0.0218(16) | -0.0109(16) | -0.0106(16) |
| C52 | 0.0464(18) | 0.059(2)   | 0.088(3)   | 0.0264(16) | -0.0041(17) | -0.014(2)   |
| C53 | 0.0382(17) | 0.054(2)   | 0.103(3)   | 0.0062(15) | 0.0070(18)  | -0.009(2)   |
| C54 | 0.0359(12) | 0.0410(14) | 0.0344(12) | 0.0131(11) | 0.0070(10)  | 0.0085(10)  |
| C55 | 0.0495(15) | 0.0542(17) | 0.0274(12) | 0.0159(13) | 0.0033(11)  | 0.0065(11)  |
| C56 | 0.087(3)   | 0.092(3)   | 0.0338(16) | -0.013(2)  | 0.0023(17)  | 0.0198(18)  |
| C57 | 0.072(2)   | 0.098(3)   | 0.0386(16) | 0.043(2)   | -0.0009(16) | 0.0079(18)  |
| C58 | 0.079(2)   | 0.070(2)   | 0.0355(15) | 0.035(2)   | 0.0054(15)  | -0.0024(15) |
| C59 | 0.0409(13) | 0.0522(16) | 0.0265(11) | 0.0204(12) | 0.0097(10)  | 0.0092(10)  |
| C60 | 0.0506(17) | 0.101(3)   | 0.0361(14) | 0.0416(19) | 0.0205(13)  | 0.0225(17)  |
| C61 | 0.081(2)   | 0.086(3)   | 0.0316(14) | 0.055(2)   | 0.0166(15)  | 0.0109(15)  |
| C62 | 0.0496(18) | 0.112(3)   | 0.0442(17) | 0.019(2)   | 0.0191(15)  | 0.031(2)    |
| C63 | 0.075(3)   | 0.174(5)   | 0.049(2)   | 0.079(3)   | 0.029(2)    | 0.031(3)    |
| C64 | 0.0572(17) | 0.0484(16) | 0.0337(13) | 0.0263(14) | 0.0058(12)  | 0.0094(12)  |
| C65 | 0.096(3)   | 0.064(2)   | 0.061(2)   | 0.039(2)   | -0.024(2)   | -0.0121(19) |

|      |            |            |            |             |             |             |
|------|------------|------------|------------|-------------|-------------|-------------|
| C72  | 0.0644(18) | 0.0418(15) | 0.0344(13) | 0.0222(14)  | 0.0176(13)  | 0.0083(11)  |
| C73  | 0.133(4)   | 0.055(2)   | 0.0437(19) | -0.017(2)   | -0.005(2)   | 0.0200(17)  |
| C74  | 0.124(4)   | 0.159(5)   | 0.069(3)   | 0.085(4)    | 0.059(3)    | 0.069(3)    |
| C75  | 0.147(6)   | 0.074(4)   | 0.122(5)   | -0.010(4)   | 0.012(4)    | 0.035(4)    |
| C76  | 0.142(5)   | 0.090(4)   | 0.065(3)   | 0.048(4)    | 0.014(3)    | 0.028(3)    |
| C77  | 0.0464(15) | 0.0481(16) | 0.0342(13) | 0.0116(12)  | 0.0112(11)  | 0.0046(11)  |
| C78  | 0.0471(16) | 0.0517(18) | 0.0396(14) | 0.0091(13)  | 0.0112(12)  | 0.0073(13)  |
| C79  | 0.0508(18) | 0.062(2)   | 0.056(2)   | 0.0073(16)  | 0.0177(15)  | 0.0112(16)  |
| C80  | 0.061(2)   | 0.075(3)   | 0.063(2)   | 0.0157(19)  | 0.0320(19)  | 0.0228(19)  |
| C81  | 0.072(2)   | 0.081(3)   | 0.0418(17) | 0.023(2)    | 0.0287(17)  | 0.0150(17)  |
| C82  | 0.0550(18) | 0.062(2)   | 0.0379(14) | 0.0139(15)  | 0.0167(13)  | 0.0048(14)  |
| C83  | 0.0541(16) | 0.0380(14) | 0.0356(13) | 0.0087(12)  | 0.0067(12)  | 0.0024(11)  |
| C84  | 0.068(2)   | 0.055(2)   | 0.0419(16) | 0.0202(17)  | -0.0030(15) | -0.0094(14) |
| C85  | 0.088(3)   | 0.077(3)   | 0.055(2)   | 0.044(2)    | -0.018(2)   | -0.0110(19) |
| C86  | 0.102(3)   | 0.065(2)   | 0.051(2)   | 0.036(2)    | -0.022(2)   | -0.0060(18) |
| C87  | 0.098(3)   | 0.053(2)   | 0.0374(16) | 0.028(2)    | -0.0067(17) | -0.0011(14) |
| C88  | 0.0646(19) | 0.0385(15) | 0.0336(13) | 0.0124(14)  | 0.0037(13)  | 0.0038(11)  |
| C89  | 0.0568(18) | 0.0507(18) | 0.0433(16) | 0.0181(15)  | -0.0041(14) | -0.0112(14) |
| C90  | 0.089(3)   | 0.053(2)   | 0.0415(17) | 0.028(2)    | 0.0004(17)  | -0.0041(14) |
| C91  | 0.127(4)   | 0.073(3)   | 0.046(2)   | 0.053(3)    | -0.005(2)   | 0.0015(18)  |
| C92  | 0.130(5)   | 0.112(4)   | 0.047(2)   | 0.079(4)    | -0.023(3)   | -0.016(2)   |
| C93  | 0.087(3)   | 0.105(4)   | 0.058(3)   | 0.049(3)    | -0.026(2)   | -0.025(3)   |
| C94  | 0.057(2)   | 0.084(3)   | 0.053(2)   | 0.026(2)    | -0.0089(16) | -0.0247(19) |
| C95  | 0.0483(17) | 0.059(2)   | 0.0525(19) | -0.0069(15) | 0.0118(14)  | -0.0163(16) |
| C96  | 0.073(3)   | 0.056(2)   | 0.077(3)   | -0.016(2)   | 0.022(2)    | -0.010(2)   |
| C97  | 0.110(4)   | 0.100(4)   | 0.080(3)   | -0.050(4)   | 0.036(3)    | -0.017(3)   |
| C98  | 0.089(4)   | 0.170(7)   | 0.096(5)   | -0.064(5)   | 0.043(4)    | -0.056(5)   |
| C99  | 0.043(2)   | 0.191(7)   | 0.086(4)   | 0.003(3)    | 0.010(2)    | -0.066(4)   |
| C100 | 0.050(2)   | 0.103(4)   | 0.064(2)   | 0.008(2)    | 0.0028(17)  | -0.031(2)   |
| C101 | 0.0398(12) | 0.0305(12) | 0.0326(11) | 0.0107(10)  | 0.0070(10)  | 0.0045(9)   |
| C102 | 0.0400(13) | 0.0361(13) | 0.0379(13) | 0.0109(11)  | 0.0093(10)  | 0.0084(10)  |
| C103 | 0.0341(13) | 0.0436(15) | 0.0495(16) | 0.0091(11)  | 0.0068(11)  | 0.0119(12)  |
| C104 | 0.0381(13) | 0.0414(15) | 0.0439(15) | 0.0097(11)  | -0.0014(11) | 0.0084(12)  |
| C105 | 0.0407(13) | 0.0414(14) | 0.0345(12) | 0.0123(11)  | 0.0024(10)  | 0.0097(11)  |
| C106 | 0.0349(12) | 0.0376(13) | 0.0305(11) | 0.0090(10)  | 0.0061(9)   | 0.0064(9)   |
| C107 | 0.0623(18) | 0.0414(15) | 0.0268(11) | 0.0095(13)  | 0.0030(12)  | 0.0027(10)  |
| C108 | 0.074(2)   | 0.060(2)   | 0.0341(14) | 0.0131(18)  | -0.0085(14) | 0.0060(14)  |
| C109 | 0.110(4)   | 0.083(3)   | 0.044(2)   | 0.017(3)    | -0.019(2)   | 0.025(2)    |
| C110 | 0.118(4)   | 0.085(3)   | 0.0342(17) | -0.001(3)   | -0.003(2)   | 0.0253(19)  |

|      |            |            |            |            |             |             |
|------|------------|------------|------------|------------|-------------|-------------|
| C111 | 0.099(3)   | 0.070(3)   | 0.0330(15) | -0.002(2)  | 0.0149(18)  | 0.0129(16)  |
| C112 | 0.070(2)   | 0.0512(18) | 0.0326(13) | 0.0057(16) | 0.0117(14)  | 0.0061(12)  |
| C113 | 0.0492(16) | 0.0499(17) | 0.0375(14) | 0.0129(13) | 0.0042(12)  | -0.0056(12) |
| C114 | 0.0483(16) | 0.0522(18) | 0.0426(15) | 0.0188(14) | -0.0004(12) | -0.0052(13) |
| C115 | 0.0551(19) | 0.057(2)   | 0.0486(18) | 0.0180(16) | -0.0110(14) | -0.0101(15) |
| C116 | 0.075(2)   | 0.070(2)   | 0.0448(18) | 0.028(2)   | -0.0085(16) | -0.0208(17) |
| C117 | 0.075(3)   | 0.082(3)   | 0.0464(18) | 0.031(2)   | 0.0032(17)  | -0.0232(18) |
| C118 | 0.0531(18) | 0.073(2)   | 0.0479(18) | 0.0212(17) | 0.0040(14)  | -0.0173(17) |
| C119 | 0.0412(14) | 0.0569(18) | 0.0373(14) | 0.0133(13) | 0.0058(11)  | -0.0036(13) |
| C120 | 0.0474(17) | 0.063(2)   | 0.0488(17) | 0.0175(15) | 0.0069(14)  | -0.0022(15) |
| C121 | 0.0508(18) | 0.069(2)   | 0.061(2)   | 0.0295(17) | -0.0018(15) | -0.0027(18) |
| C122 | 0.0416(17) | 0.082(3)   | 0.063(2)   | 0.0193(18) | -0.0013(15) | -0.012(2)   |
| C123 | 0.0463(18) | 0.067(2)   | 0.079(3)   | 0.0073(17) | 0.0028(17)  | -0.014(2)   |
| C124 | 0.0423(16) | 0.055(2)   | 0.060(2)   | 0.0107(14) | 0.0048(14)  | -0.0058(16) |
| C125 | 0.0424(13) | 0.0377(13) | 0.0280(11) | 0.0060(11) | 0.0102(10)  | 0.0001(9)   |
| C126 | 0.070(2)   | 0.0427(17) | 0.0454(17) | 0.0145(15) | 0.0047(15)  | -0.0100(13) |
| C127 | 0.083(3)   | 0.061(2)   | 0.055(2)   | 0.027(2)   | 0.0203(19)  | -0.0123(17) |
| C128 | 0.091(3)   | 0.0370(17) | 0.067(2)   | 0.0144(18) | -0.007(2)   | -0.0060(16) |
| C129 | 0.082(3)   | 0.050(2)   | 0.059(2)   | 0.0170(19) | -0.0124(19) | -0.0191(17) |
| C130 | 0.0551(17) | 0.0423(16) | 0.0449(16) | 0.0056(13) | 0.0211(14)  | 0.0035(12)  |
| C131 | 0.113(4)   | 0.056(2)   | 0.080(3)   | 0.030(2)   | 0.043(3)    | 0.037(2)    |
| C132 | 0.146(6)   | 0.097(5)   | 0.276(11)  | 0.037(4)   | 0.104(7)    | 0.121(6)    |
| C133 | 0.221(8)   | 0.090(4)   | 0.068(3)   | 0.070(5)   | 0.039(4)    | 0.045(3)    |
| C134 | 0.139(5)   | 0.068(3)   | 0.077(3)   | 0.048(3)   | 0.039(3)    | 0.037(2)    |
| C135 | 0.0358(12) | 0.0429(14) | 0.0327(12) | 0.0064(11) | 0.0055(10)  | -0.0043(10) |
| C136 | 0.0604(19) | 0.062(2)   | 0.0360(14) | 0.0145(16) | 0.0197(14)  | 0.0057(14)  |
| C137 | 0.092(3)   | 0.091(3)   | 0.0476(19) | 0.030(2)   | 0.039(2)    | 0.016(2)    |
| C138 | 0.072(2)   | 0.069(2)   | 0.0382(16) | 0.0202(19) | 0.0042(15)  | 0.0046(15)  |
| C139 | 0.061(2)   | 0.067(2)   | 0.0521(19) | 0.0100(17) | 0.0244(16)  | 0.0147(17)  |
| C140 | 0.0412(14) | 0.0466(16) | 0.0329(12) | 0.0182(12) | -0.0001(10) | 0.0019(11)  |
| C141 | 0.0442(15) | 0.0371(14) | 0.0489(16) | 0.0155(12) | 0.0023(12)  | 0.0034(12)  |
| C142 | 0.0469(16) | 0.0447(17) | 0.062(2)   | 0.0178(14) | -0.0036(14) | -0.0035(14) |
| C143 | 0.0522(17) | 0.0456(17) | 0.0577(19) | 0.0203(14) | -0.0004(14) | 0.0022(14)  |
| C144 | 0.068(2)   | 0.0489(19) | 0.058(2)   | 0.0143(17) | 0.0154(17)  | 0.0077(16)  |
| C145 | 0.0424(15) | 0.064(2)   | 0.0381(14) | 0.0147(14) | 0.0000(12)  | -0.0090(14) |
| C146 | 0.058(2)   | 0.097(3)   | 0.052(2)   | 0.037(2)   | -0.0212(16) | -0.025(2)   |
| C147 | 0.098(4)   | 0.178(6)   | 0.049(2)   | 0.069(4)   | -0.022(2)   | -0.029(3)   |
| C148 | 0.089(3)   | 0.085(4)   | 0.127(5)   | 0.029(3)   | -0.066(3)   | -0.034(3)   |
| C149 | 0.051(2)   | 0.100(3)   | 0.074(3)   | 0.031(2)   | -0.0141(18) | -0.013(2)   |

The general temperature factor expression:  $\exp(-2\pi^2(a^2U_{11}h^2 + b^2U_{22}k^2 + c^2U_{33}l^2 + 2a*b*U_{12}hk + 2a*c*U_{13}hl + 2b*c*U_{23}kl))$

**Table S5-4.** Bond lengths (Å)

| atom | atom | distance   | atom | atom | distance   |
|------|------|------------|------|------|------------|
| Ni1  | Ni2  | 2.4229(18) | Ni1  | Si3  | 2.3888(17) |
| Ni1  | C49  | 2.029(3)   | Ni1  | C54  | 1.795(3)   |
| Ni1  | C59  | 1.781(3)   | Ni2  | Si3  | 2.4042(18) |
| Ni2  | Si4  | 2.2129(18) | Ni2  | C59  | 1.840(3)   |
| Ni2  | C64  | 1.822(3)   | Ni2  | C72  | 1.816(3)   |
| Ni3  | Ni4  | 2.4524(19) | Ni3  | Si7  | 2.4021(16) |
| Ni3  | C125 | 2.020(3)   | Ni3  | C130 | 1.789(4)   |
| Ni3  | C135 | 1.784(3)   | Ni4  | Si7  | 2.3710(18) |
| Ni4  | Si8  | 2.2059(17) | Ni4  | C135 | 1.848(3)   |
| Ni4  | C140 | 1.807(3)   | Ni4  | C145 | 1.844(3)   |
| Si1  | Si2  | 2.492(2)   | Si1  | N1   | 1.734(3)   |
| Si1  | C1   | 1.865(3)   | Si1  | C7   | 1.859(3)   |
| Si1  | C49  | 1.817(3)   | Si2  | N1   | 1.716(3)   |
| Si2  | C13  | 1.861(4)   | Si2  | C19  | 1.863(3)   |
| Si2  | C49  | 1.824(3)   | Si3  | C25  | 1.870(3)   |
| Si3  | C31  | 1.875(4)   | Si3  | C49  | 1.803(3)   |
| Si4  | N3   | 1.743(3)   | Si4  | C37  | 1.835(3)   |
| Si4  | C43  | 1.857(4)   | Si4  | C59  | 2.091(3)   |
| Si5  | Si6  | 2.495(2)   | Si5  | N6   | 1.716(2)   |
| Si5  | C77  | 1.853(3)   | Si5  | C83  | 1.855(3)   |
| Si5  | C125 | 1.823(3)   | Si6  | N6   | 1.719(3)   |
| Si6  | C89  | 1.855(4)   | Si6  | C95  | 1.869(4)   |
| Si6  | C125 | 1.827(3)   | Si7  | C101 | 1.879(3)   |
| Si7  | C107 | 1.878(3)   | Si7  | C125 | 1.784(3)   |
| Si8  | N8   | 1.751(3)   | Si8  | C113 | 1.846(3)   |
| Si8  | C119 | 1.848(4)   | Si8  | C135 | 2.104(4)   |
| N1   | C50  | 1.467(4)   | N2   | C54  | 1.139(4)   |
| N2   | C55  | 1.435(4)   | N3   | C59  | 1.311(4)   |
| N3   | C60  | 1.479(4)   | N4   | C64  | 1.144(4)   |
| N4   | C65  | 1.435(5)   | N5   | C72  | 1.133(4)   |
| N5   | C73  | 1.428(5)   | N6   | C126 | 1.461(5)   |
| N7   | C130 | 1.144(5)   | N7   | C131 | 1.445(6)   |
| N8   | C135 | 1.307(4)   | N8   | C136 | 1.463(5)   |
| N9   | C140 | 1.139(4)   | N9   | C141 | 1.432(4)   |

|     |      |           |     |      |           |
|-----|------|-----------|-----|------|-----------|
| N10 | C145 | 1.137(4)  | N10 | C146 | 1.432(5)  |
| C1  | C2   | 1.372(5)  | C1  | C6   | 1.376(5)  |
| C2  | C3   | 1.373(5)  | C3  | C4   | 1.352(6)  |
| C4  | C5   | 1.353(6)  | C5  | C6   | 1.381(5)  |
| C7  | C8   | 1.377(4)  | C7  | C12  | 1.384(5)  |
| C8  | C9   | 1.362(5)  | C9  | C10  | 1.366(5)  |
| C10 | C11  | 1.345(6)  | C11 | C12  | 1.378(5)  |
| C13 | C14  | 1.378(6)  | C13 | C18  | 1.394(6)  |
| C14 | C15  | 1.364(8)  | C15 | C16  | 1.354(9)  |
| C16 | C17  | 1.388(11) | C17 | C18  | 1.363(9)  |
| C19 | C20  | 1.388(5)  | C19 | C24  | 1.373(5)  |
| C20 | C21  | 1.367(5)  | C21 | C22  | 1.343(6)  |
| C22 | C23  | 1.370(5)  | C23 | C24  | 1.368(5)  |
| C25 | C26  | 1.379(5)  | C25 | C30  | 1.390(4)  |
| C26 | C27  | 1.363(4)  | C27 | C28  | 1.366(5)  |
| C28 | C29  | 1.356(5)  | C29 | C30  | 1.370(4)  |
| C31 | C32  | 1.366(4)  | C31 | C36  | 1.380(5)  |
| C32 | C33  | 1.363(6)  | C33 | C34  | 1.376(7)  |
| C34 | C35  | 1.356(6)  | C35 | C36  | 1.398(7)  |
| C37 | C38  | 1.371(5)  | C37 | C42  | 1.369(5)  |
| C38 | C39  | 1.355(5)  | C39 | C40  | 1.359(6)  |
| C40 | C41  | 1.340(5)  | C41 | C42  | 1.358(5)  |
| C43 | C44  | 1.366(8)  | C43 | C48  | 1.350(5)  |
| C44 | C45  | 1.397(8)  | C45 | C46  | 1.362(10) |
| C46 | C47  | 1.332(11) | C47 | C48  | 1.350(7)  |
| C50 | C51  | 1.504(6)  | C50 | C52  | 1.520(6)  |
| C50 | C53  | 1.505(5)  | C55 | C56  | 1.497(5)  |
| C55 | C57  | 1.480(6)  | C55 | C58  | 1.486(6)  |
| C60 | C61  | 1.483(5)  | C60 | C62  | 1.490(7)  |
| C60 | C63  | 1.513(7)  | C65 | C66  | 1.718(15) |
| C65 | C67  | 1.428(14) | C65 | C68  | 1.515(13) |
| C65 | C69  | 1.705(11) | C65 | C70  | 1.436(10) |
| C65 | C71  | 1.398(12) | C66 | C71  | 1.119(18) |
| C67 | C69  | 1.162(18) | C67 | C71  | 1.448(16) |
| C68 | C70  | 0.518(14) | C73 | C74  | 1.453(8)  |
| C73 | C75  | 1.462(7)  | C73 | C76  | 1.593(9)  |
| C77 | C78  | 1.376(4)  | C77 | C82  | 1.392(4)  |
| C78 | C79  | 1.372(5)  | C79 | C80  | 1.358(6)  |
| C80 | C81  | 1.368(5)  | C81 | C82  | 1.375(5)  |

|      |      |           |      |                   |           |
|------|------|-----------|------|-------------------|-----------|
| C83  | C84  | 1.381(6)  | C83  | C88               | 1.386(4)  |
| C84  | C85  | 1.357(6)  | C85  | C86               | 1.359(6)  |
| C86  | C87  | 1.347(7)  | C87  | C88               | 1.373(5)  |
| C89  | C90  | 1.361(5)  | C89  | C94               | 1.391(5)  |
| C90  | C91  | 1.379(6)  | C91  | C92               | 1.368(7)  |
| C92  | C93  | 1.334(8)  | C93  | C94               | 1.353(7)  |
| C95  | C96  | 1.378(6)  | C95  | C100              | 1.398(7)  |
| C96  | C97  | 1.364(8)  | C97  | C98               | 1.387(12) |
| C98  | C99  | 1.342(13) | C99  | C100              | 1.387(7)  |
| C101 | C102 | 1.375(4)  | C101 | C106              | 1.389(4)  |
| C102 | C103 | 1.373(4)  | C103 | C104              | 1.364(5)  |
| C104 | C105 | 1.369(4)  | C105 | C106              | 1.371(3)  |
| C107 | C108 | 1.362(6)  | C107 | C112              | 1.380(5)  |
| C108 | C109 | 1.377(6)  | C109 | C110              | 1.357(8)  |
| C110 | C111 | 1.342(8)  | C111 | C112              | 1.368(5)  |
| C113 | C114 | 1.366(5)  | C113 | C118              | 1.374(5)  |
| C114 | C115 | 1.376(4)  | C115 | C116              | 1.367(6)  |
| C116 | C117 | 1.343(6)  | C117 | C118              | 1.370(5)  |
| C119 | C120 | 1.378(6)  | C119 | C124              | 1.366(5)  |
| C120 | C121 | 1.360(5)  | C121 | C122              | 1.359(5)  |
| C122 | C123 | 1.350(7)  | C123 | C124              | 1.374(5)  |
| C126 | C127 | 1.509(6)  | C126 | C128              | 1.504(6)  |
| C126 | C129 | 1.501(5)  | C131 | C132              | 1.484(9)  |
| C131 | C133 | 1.508(7)  | C131 | C134              | 1.483(8)  |
| C136 | C137 | 1.519(6)  | C136 | C138              | 1.506(5)  |
| C136 | C139 | 1.488(5)  | C141 | C142              | 1.498(5)  |
| C141 | C143 | 1.497(5)  | C141 | C144              | 1.497(5)  |
| C146 | C147 | 1.524(7)  | C146 | C148              | 1.465(7)  |
| C146 | C149 | 1.481(8)  | C150 | C151              | 1.467(15) |
| C151 | C152 | 1.416(11) | C152 | C153              | 1.379(12) |
| C153 | C154 | 1.414(13) | C155 | C156              | 1.241(16) |
| C155 | C157 | 1.59(3)   | C156 | C156 <sup>1</sup> | 1.509(15) |

Symmetry Operators:

(1) -X+1,-Y,-Z+1

**Table S5-5.** Bond angles (°)

| atom | atom | atom | angle      | atom | atom | atom | angle     |
|------|------|------|------------|------|------|------|-----------|
| Ni2  | Ni1  | Si3  | 59.95(6)   | Ni2  | Ni1  | C49  | 102.87(9) |
| Ni2  | Ni1  | C54  | 153.29(10) | Ni2  | Ni1  | C59  | 49.05(8)  |

|      |     |      |            |      |     |      |            |
|------|-----|------|------------|------|-----|------|------------|
| Si3  | Ni1 | C49  | 47.30(7)   | Si3  | Ni1 | C54  | 145.89(11) |
| Si3  | Ni1 | C59  | 106.42(9)  | C49  | Ni1 | C54  | 103.55(12) |
| C49  | Ni1 | C59  | 151.92(12) | C54  | Ni1 | C59  | 104.48(13) |
| Ni1  | Ni2 | Si3  | 59.32(3)   | Ni1  | Ni2 | Si4  | 107.39(5)  |
| Ni1  | Ni2 | C59  | 46.99(11)  | Ni1  | Ni2 | C64  | 129.86(12) |
| Ni1  | Ni2 | C72  | 112.65(11) | Si3  | Ni2 | Si4  | 164.11(4)  |
| Si3  | Ni2 | C59  | 103.86(11) | Si3  | Ni2 | C64  | 88.68(13)  |
| Si3  | Ni2 | C72  | 93.86(13)  | Si4  | Ni2 | C59  | 61.29(10)  |
| Si4  | Ni2 | C64  | 95.07(13)  | Si4  | Ni2 | C72  | 99.82(13)  |
| C59  | Ni2 | C64  | 123.08(14) | C59  | Ni2 | C72  | 127.05(13) |
| C64  | Ni2 | C72  | 106.54(15) | Ni4  | Ni3 | Si7  | 58.46(5)   |
| Ni4  | Ni3 | C125 | 100.56(9)  | Ni4  | Ni3 | C130 | 154.20(12) |
| Ni4  | Ni3 | C135 | 48.65(11)  | Si7  | Ni3 | C125 | 46.60(9)   |
| Si7  | Ni3 | C130 | 143.09(12) | Si7  | Ni3 | C135 | 105.10(12) |
| C125 | Ni3 | C130 | 105.06(15) | C125 | Ni3 | C135 | 149.16(14) |
| C130 | Ni3 | C135 | 105.78(16) | Ni3  | Ni4 | Si7  | 59.71(3)   |
| Ni3  | Ni4 | Si8  | 108.17(4)  | Ni3  | Ni4 | C135 | 46.42(10)  |
| Ni3  | Ni4 | C140 | 130.16(12) | Ni3  | Ni4 | C145 | 110.21(12) |
| Si7  | Ni4 | Si8  | 157.33(4)  | Si7  | Ni4 | C135 | 104.17(10) |
| Si7  | Ni4 | C140 | 81.98(11)  | Si7  | Ni4 | C145 | 101.27(13) |
| Si8  | Ni4 | C135 | 61.79(11)  | Si8  | Ni4 | C140 | 95.20(10)  |
| Si8  | Ni4 | C145 | 101.03(13) | C135 | Ni4 | C140 | 133.47(12) |
| C135 | Ni4 | C145 | 116.05(14) | C140 | Ni4 | C145 | 107.41(15) |
| Si2  | Si1 | N1   | 43.47(11)  | Si2  | Si1 | C1   | 122.91(12) |
| Si2  | Si1 | C7   | 134.23(11) | Si2  | Si1 | C49  | 46.91(9)   |
| N1   | Si1 | C1   | 114.24(14) | N1   | Si1 | C7   | 117.28(14) |
| N1   | Si1 | C49  | 90.32(14)  | C1   | Si1 | C7   | 102.78(15) |
| C1   | Si1 | C49  | 113.35(15) | C7   | Si1 | C49  | 119.40(15) |
| Si1  | Si2 | N1   | 44.04(8)   | Si1  | Si2 | C13  | 124.34(12) |
| Si1  | Si2 | C19  | 131.27(12) | Si1  | Si2 | C49  | 46.69(11)  |
| N1   | Si2 | C13  | 110.92(17) | N1   | Si2 | C19  | 116.79(16) |
| N1   | Si2 | C49  | 90.67(14)  | C13  | Si2 | C19  | 104.09(16) |
| C13  | Si2 | C49  | 118.61(15) | C19  | Si2 | C49  | 116.04(15) |
| Ni1  | Si3 | Ni2  | 60.73(4)   | Ni1  | Si3 | C25  | 105.77(10) |
| Ni1  | Si3 | C31  | 150.48(11) | Ni1  | Si3 | C49  | 55.83(11)  |
| Ni2  | Si3 | C25  | 107.93(12) | Ni2  | Si3 | C31  | 102.55(12) |
| Ni2  | Si3 | C49  | 111.31(11) | C25  | Si3 | C31  | 102.53(12) |
| C25  | Si3 | C49  | 111.72(13) | C31  | Si3 | C49  | 119.78(15) |
| Ni2  | Si4 | N3   | 88.92(11)  | Ni2  | Si4 | C37  | 118.59(13) |

|      |     |      |            |      |     |      |            |
|------|-----|------|------------|------|-----|------|------------|
| Ni2  | Si4 | C43  | 119.64(13) | Ni2  | Si4 | C59  | 50.53(9)   |
| N3   | Si4 | C37  | 110.37(14) | N3   | Si4 | C43  | 107.90(14) |
| N3   | Si4 | C59  | 38.67(13)  | C37  | Si4 | C43  | 108.88(17) |
| C37  | Si4 | C59  | 128.33(15) | C43  | Si4 | C59  | 119.20(13) |
| Si6  | Si5 | N6   | 43.45(11)  | Si6  | Si5 | C77  | 121.10(11) |
| Si6  | Si5 | C83  | 137.26(11) | Si6  | Si5 | C125 | 46.95(9)   |
| N6   | Si5 | C77  | 113.28(14) | N6   | Si5 | C83  | 119.27(15) |
| N6   | Si5 | C125 | 90.23(14)  | C77  | Si5 | C83  | 101.57(15) |
| C77  | Si5 | C125 | 113.59(16) | C83  | Si5 | C125 | 119.59(14) |
| Si5  | Si6 | N6   | 43.38(9)   | Si5  | Si6 | C89  | 124.96(12) |
| Si5  | Si6 | C95  | 130.87(14) | Si5  | Si6 | C125 | 46.79(10)  |
| N6   | Si6 | C89  | 113.36(16) | N6   | Si6 | C95  | 116.17(17) |
| N6   | Si6 | C125 | 89.99(14)  | C89  | Si6 | C95  | 103.99(17) |
| C89  | Si6 | C125 | 118.63(15) | C95  | Si6 | C125 | 115.08(15) |
| Ni3  | Si7 | Ni4  | 61.83(5)   | Ni3  | Si7 | C101 | 102.27(10) |
| Ni3  | Si7 | C107 | 153.46(10) | Ni3  | Si7 | C125 | 55.34(10)  |
| Ni4  | Si7 | C101 | 106.22(11) | Ni4  | Si7 | C107 | 107.65(12) |
| Ni4  | Si7 | C125 | 111.54(10) | C101 | Si7 | C107 | 104.15(13) |
| C101 | Si7 | C125 | 110.67(13) | C107 | Si7 | C125 | 115.95(13) |
| Ni4  | Si8 | N8   | 88.93(10)  | Ni4  | Si8 | C113 | 118.73(12) |
| Ni4  | Si8 | C119 | 119.33(11) | Ni4  | Si8 | C135 | 50.72(9)   |
| N8   | Si8 | C113 | 105.63(15) | N8   | Si8 | C119 | 109.39(14) |
| N8   | Si8 | C135 | 38.28(12)  | C113 | Si8 | C119 | 111.00(16) |
| C113 | Si8 | C135 | 118.57(15) | C119 | Si8 | C135 | 125.92(13) |
| Si1  | N1  | Si2  | 92.48(14)  | Si1  | N1  | C50  | 132.8(2)   |
| Si2  | N1  | C50  | 134.5(2)   | C54  | N2  | C55  | 179.0(3)   |
| Si4  | N3  | C59  | 85.14(18)  | Si4  | N3  | C60  | 143.0(3)   |
| C59  | N3  | C60  | 128.9(3)   | C64  | N4  | C65  | 179.5(4)   |
| C72  | N5  | C73  | 165.9(4)   | Si5  | N6  | Si6  | 93.17(15)  |
| Si5  | N6  | C126 | 133.5(2)   | Si6  | N6  | C126 | 133.3(2)   |
| C130 | N7  | C131 | 177.9(3)   | Si8  | N8  | C135 | 85.7(2)    |
| Si8  | N8  | C136 | 144.1(2)   | C135 | N8  | C136 | 128.7(3)   |
| C140 | N9  | C141 | 171.4(3)   | C145 | N10 | C146 | 177.4(4)   |
| Si1  | C1  | C2   | 123.6(3)   | Si1  | C1  | C6   | 120.0(3)   |
| C2   | C1  | C6   | 116.3(3)   | C1   | C2  | C3   | 122.2(3)   |
| C2   | C3  | C4   | 120.1(4)   | C3   | C4  | C5   | 119.6(4)   |
| C4   | C5  | C6   | 120.1(4)   | C1   | C6  | C5   | 121.7(3)   |
| Si1  | C7  | C8   | 119.2(2)   | Si1  | C7  | C12  | 123.4(3)   |
| C8   | C7  | C12  | 117.1(3)   | C7   | C8  | C9   | 122.0(3)   |



|     |     |     |            |     |     |     |            |
|-----|-----|-----|------------|-----|-----|-----|------------|
| C8  | C9  | C10 | 119.6(3)   | C9  | C10 | C11 | 120.0(3)   |
| C10 | C11 | C12 | 120.6(4)   | C7  | C12 | C11 | 120.6(3)   |
| Si2 | C13 | C14 | 120.8(3)   | Si2 | C13 | C18 | 122.3(3)   |
| C14 | C13 | C18 | 116.7(4)   | C13 | C14 | C15 | 122.0(4)   |
| C14 | C15 | C16 | 120.1(6)   | C15 | C16 | C17 | 120.2(7)   |
| C16 | C17 | C18 | 119.0(6)   | C13 | C18 | C17 | 122.0(5)   |
| Si2 | C19 | C20 | 123.3(3)   | Si2 | C19 | C24 | 120.3(2)   |
| C20 | C19 | C24 | 116.4(3)   | C19 | C20 | C21 | 122.0(3)   |
| C20 | C21 | C22 | 120.2(3)   | C21 | C22 | C23 | 119.4(4)   |
| C22 | C23 | C24 | 120.5(4)   | C19 | C24 | C23 | 121.4(3)   |
| Si3 | C25 | C26 | 122.4(2)   | Si3 | C25 | C30 | 121.2(2)   |
| C26 | C25 | C30 | 116.3(3)   | C25 | C26 | C27 | 121.9(3)   |
| C26 | C27 | C28 | 120.3(3)   | C27 | C28 | C29 | 119.6(3)   |
| C28 | C29 | C30 | 120.1(3)   | C25 | C30 | C29 | 121.7(3)   |
| Si3 | C31 | C32 | 119.7(3)   | Si3 | C31 | C36 | 123.2(2)   |
| C32 | C31 | C36 | 117.0(3)   | C31 | C32 | C33 | 123.7(4)   |
| C32 | C33 | C34 | 118.6(4)   | C33 | C34 | C35 | 120.0(5)   |
| C34 | C35 | C36 | 120.4(5)   | C31 | C36 | C35 | 120.3(3)   |
| Si4 | C37 | C38 | 122.7(3)   | Si4 | C37 | C42 | 121.4(3)   |
| C38 | C37 | C42 | 115.9(3)   | C37 | C38 | C39 | 122.0(4)   |
| C38 | C39 | C40 | 120.3(4)   | C39 | C40 | C41 | 119.1(3)   |
| C40 | C41 | C42 | 120.4(3)   | C37 | C42 | C41 | 122.2(3)   |
| Si4 | C43 | C44 | 122.4(3)   | Si4 | C43 | C48 | 120.4(3)   |
| C44 | C43 | C48 | 117.1(4)   | C43 | C44 | C45 | 119.2(5)   |
| C44 | C45 | C46 | 121.2(7)   | C45 | C46 | C47 | 118.2(6)   |
| C46 | C47 | C48 | 120.5(5)   | C43 | C48 | C47 | 123.4(5)   |
| Ni1 | C49 | Si1 | 123.62(16) | Ni1 | C49 | Si2 | 107.87(15) |
| Ni1 | C49 | Si3 | 76.88(12)  | Si1 | C49 | Si2 | 86.39(13)  |
| Si1 | C49 | Si3 | 126.13(17) | Si2 | C49 | Si3 | 138.72(18) |
| N1  | C50 | C51 | 110.9(3)   | N1  | C50 | C52 | 109.0(3)   |
| N1  | C50 | C53 | 111.5(3)   | C51 | C50 | C52 | 108.9(4)   |
| C51 | C50 | C53 | 108.3(3)   | C52 | C50 | C53 | 108.1(3)   |
| Ni1 | C54 | N2  | 177.9(3)   | N2  | C55 | C56 | 107.1(2)   |
| N2  | C55 | C57 | 107.4(3)   | N2  | C55 | C58 | 108.6(3)   |
| C56 | C55 | C57 | 112.3(3)   | C56 | C55 | C58 | 111.2(3)   |
| C57 | C55 | C58 | 110.1(3)   | Ni1 | C59 | Ni2 | 83.97(13)  |
| Ni1 | C59 | Si4 | 149.64(16) | Ni1 | C59 | N3  | 151.9(2)   |
| Ni2 | C59 | Si4 | 68.18(10)  | Ni2 | C59 | N3  | 123.8(2)   |
| Si4 | C59 | N3  | 56.20(17)  | N3  | C60 | C61 | 108.7(3)   |

|     |      |      |           |     |      |      |          |
|-----|------|------|-----------|-----|------|------|----------|
| N3  | C60  | C62  | 107.8(3)  | N3  | C60  | C63  | 106.6(3) |
| C61 | C60  | C62  | 113.0(3)  | C61 | C60  | C63  | 110.0(4) |
| C62 | C60  | C63  | 110.4(3)  | Ni2 | C64  | N4   | 176.2(4) |
| N4  | C65  | C66  | 98.2(5)   | N4  | C65  | C67  | 115.4(6) |
| N4  | C65  | C68  | 109.2(5)  | N4  | C65  | C69  | 100.8(4) |
| N4  | C65  | C70  | 109.8(4)  | N4  | C65  | C71  | 109.7(5) |
| C66 | C65  | C67  | 101.7(8)  | C66 | C65  | C68  | 114.3(7) |
| C66 | C65  | C69  | 144.1(7)  | C66 | C65  | C70  | 94.8(7)  |
| C66 | C65  | C71  | 40.5(7)   | C67 | C65  | C68  | 116.4(7) |
| C67 | C65  | C69  | 42.4(7)   | C67 | C65  | C70  | 128.4(6) |
| C67 | C65  | C71  | 61.6(7)   | C68 | C65  | C69  | 87.6(6)  |
| C68 | C65  | C70  | 20.0(5)   | C68 | C65  | C71  | 136.2(6) |
| C69 | C65  | C70  | 106.8(6)  | C69 | C65  | C71  | 104.0(6) |
| C70 | C65  | C71  | 123.1(6)  | C65 | C66  | C71  | 54.2(8)  |
| C65 | C67  | C69  | 81.6(10)  | C65 | C67  | C71  | 58.2(7)  |
| C69 | C67  | C71  | 139.7(12) | C65 | C68  | C70  | 71.4(16) |
| C65 | C69  | C67  | 56.0(8)   | C65 | C70  | C68  | 88.6(17) |
| C65 | C71  | C66  | 85.4(10)  | C65 | C71  | C67  | 60.2(7)  |
| C66 | C71  | C67  | 144.7(13) | Ni2 | C72  | N5   | 173.7(4) |
| N5  | C73  | C74  | 107.8(4)  | N5  | C73  | C75  | 106.9(4) |
| N5  | C73  | C76  | 106.3(4)  | C74 | C73  | C75  | 124.1(5) |
| C74 | C73  | C76  | 108.0(4)  | C75 | C73  | C76  | 102.5(5) |
| Si5 | C77  | C78  | 120.4(2)  | Si5 | C77  | C82  | 122.3(2) |
| C78 | C77  | C82  | 116.9(3)  | C77 | C78  | C79  | 121.7(3) |
| C78 | C79  | C80  | 120.3(3)  | C79 | C80  | C81  | 119.8(4) |
| C80 | C81  | C82  | 119.9(3)  | C77 | C82  | C81  | 121.4(3) |
| Si5 | C83  | C84  | 123.2(2)  | Si5 | C83  | C88  | 120.4(3) |
| C84 | C83  | C88  | 116.0(3)  | C83 | C84  | C85  | 122.2(4) |
| C84 | C85  | C86  | 120.3(5)  | C85 | C86  | C87  | 119.6(4) |
| C86 | C87  | C88  | 120.5(3)  | C83 | C88  | C87  | 121.4(4) |
| Si6 | C89  | C90  | 120.5(3)  | Si6 | C89  | C94  | 123.2(3) |
| C90 | C89  | C94  | 116.2(4)  | C89 | C90  | C91  | 122.1(4) |
| C90 | C91  | C92  | 119.5(5)  | C91 | C92  | C93  | 119.4(5) |
| C92 | C93  | C94  | 121.2(5)  | C89 | C94  | C93  | 121.6(4) |
| Si6 | C95  | C96  | 125.4(3)  | Si6 | C95  | C100 | 116.9(3) |
| C96 | C95  | C100 | 117.6(4)  | C95 | C96  | C97  | 122.5(5) |
| C96 | C97  | C98  | 119.0(6)  | C97 | C98  | C99  | 119.8(7) |
| C98 | C99  | C100 | 121.7(7)  | C95 | C100 | C99  | 119.3(6) |
| Si7 | C101 | C102 | 125.8(2)  | Si7 | C101 | C106 | 118.3(2) |

|      |      |      |            |      |      |      |            |
|------|------|------|------------|------|------|------|------------|
| C102 | C101 | C106 | 115.9(2)   | C101 | C102 | C103 | 122.4(3)   |
| C102 | C103 | C104 | 120.1(3)   | C103 | C104 | C105 | 119.3(3)   |
| C104 | C105 | C106 | 119.9(3)   | C101 | C106 | C105 | 122.3(3)   |
| Si7  | C107 | C108 | 126.1(3)   | Si7  | C107 | C112 | 117.7(3)   |
| C108 | C107 | C112 | 116.1(3)   | C107 | C108 | C109 | 121.9(4)   |
| C108 | C109 | C110 | 120.1(5)   | C109 | C110 | C111 | 119.5(4)   |
| C110 | C111 | C112 | 120.3(5)   | C107 | C112 | C111 | 122.1(4)   |
| Si8  | C113 | C114 | 119.4(3)   | Si8  | C113 | C118 | 122.5(2)   |
| C114 | C113 | C118 | 117.8(3)   | C113 | C114 | C115 | 121.7(3)   |
| C114 | C115 | C116 | 118.7(3)   | C115 | C116 | C117 | 120.7(3)   |
| C116 | C117 | C118 | 120.3(4)   | C113 | C118 | C117 | 120.9(4)   |
| Si8  | C119 | C120 | 120.4(2)   | Si8  | C119 | C124 | 121.6(3)   |
| C120 | C119 | C124 | 117.9(3)   | C119 | C120 | C121 | 120.8(3)   |
| C120 | C121 | C122 | 120.0(4)   | C121 | C122 | C123 | 120.5(4)   |
| C122 | C123 | C124 | 119.4(4)   | C119 | C124 | C123 | 121.3(4)   |
| Ni3  | C125 | Si5  | 126.07(16) | Ni3  | C125 | Si6  | 100.24(14) |
| Ni3  | C125 | Si7  | 78.06(11)  | Si5  | C125 | Si6  | 86.26(14)  |
| Si5  | C125 | Si7  | 132.20(16) | Si6  | C125 | Si7  | 133.99(18) |
| N6   | C126 | C127 | 110.9(3)   | N6   | C126 | C128 | 109.5(3)   |
| N6   | C126 | C129 | 110.3(3)   | C127 | C126 | C128 | 108.2(4)   |
| C127 | C126 | C129 | 109.0(3)   | C128 | C126 | C129 | 108.9(3)   |
| Ni3  | C130 | N7   | 177.7(3)   | N7   | C131 | C132 | 107.8(5)   |
| N7   | C131 | C133 | 106.9(4)   | N7   | C131 | C134 | 107.5(4)   |
| C132 | C131 | C133 | 111.7(6)   | C132 | C131 | C134 | 111.1(5)   |
| C133 | C131 | C134 | 111.5(5)   | Ni3  | C135 | Ni4  | 84.92(13)  |
| Ni3  | C135 | Si8  | 152.30(18) | Ni3  | C135 | N8   | 151.6(3)   |
| Ni4  | C135 | Si8  | 67.49(12)  | Ni4  | C135 | N8   | 123.4(3)   |
| Si8  | C135 | N8   | 56.06(18)  | N8   | C136 | C137 | 105.9(3)   |
| N8   | C136 | C138 | 108.8(3)   | N8   | C136 | C139 | 108.6(3)   |
| C137 | C136 | C138 | 110.4(3)   | C137 | C136 | C139 | 110.2(3)   |
| C138 | C136 | C139 | 112.8(4)   | Ni4  | C140 | N9   | 177.9(3)   |
| N9   | C141 | C142 | 107.3(3)   | N9   | C141 | C143 | 107.7(3)   |
| N9   | C141 | C144 | 108.0(2)   | C142 | C141 | C143 | 111.2(3)   |
| C142 | C141 | C144 | 111.6(3)   | C143 | C141 | C144 | 110.8(3)   |
| Ni4  | C145 | N10  | 175.7(4)   | N10  | C146 | C147 | 106.1(4)   |
| N10  | C146 | C148 | 109.3(4)   | N10  | C146 | C149 | 107.7(3)   |
| C147 | C146 | C148 | 112.8(4)   | C147 | C146 | C149 | 109.3(5)   |
| C148 | C146 | C149 | 111.3(4)   | C150 | C151 | C152 | 109.6(8)   |
| C151 | C152 | C153 | 109.7(7)   | C152 | C153 | C154 | 108.4(8)   |

C156 C155 C157 117.4(13) C155 C156 C156<sup>1</sup> 116.3(11)

Symmetry Operators:

(1) -X+1,-Y,-Z+1

**Table S5-6.** Torsion Angles(°)

(Those having bond angles > 160 or < 20 degrees are excluded.)

| atom1 | atom2 | atom3 | atom4 | angle       | atom1 | atom2 | atom3 | atom4 | angle       |
|-------|-------|-------|-------|-------------|-------|-------|-------|-------|-------------|
| Ni2   | Ni1   | Si3   | Ni2   | 0.00(3)     | Ni2   | Ni1   | Si3   | C25   | -102.02(6)  |
| Ni2   | Ni1   | Si3   | C31   | 61.04(9)    | Ni2   | Ni1   | Si3   | C49   | 152.13(4)   |
| Si3   | Ni1   | Ni2   | Si3   | 0.00(3)     | Si3   | Ni1   | Ni2   | Si4   | 170.43(3)   |
| Si3   | Ni1   | Ni2   | C59   | 159.13(3)   | Si3   | Ni1   | Ni2   | C64   | 57.97(5)    |
| Si3   | Ni1   | Ni2   | C72   | -80.64(7)   | Ni2   | Ni1   | C49   | Si1   | -149.41(12) |
| Ni2   | Ni1   | C49   | Si2   | 112.84(12)  | Ni2   | Ni1   | C49   | Si3   | -24.52(10)  |
| C49   | Ni1   | Ni2   | Si3   | 20.63(8)    | C49   | Ni1   | Ni2   | Si4   | -168.93(8)  |
| C49   | Ni1   | Ni2   | C59   | 179.76(8)   | C49   | Ni1   | Ni2   | C64   | 78.60(9)    |
| C49   | Ni1   | Ni2   | C72   | -60.01(10)  | C54   | Ni1   | Ni2   | Si3   | -168.02(19) |
| C54   | Ni1   | Ni2   | Si4   | 2.41(19)    | C54   | Ni1   | Ni2   | C59   | -8.90(19)   |
| C54   | Ni1   | Ni2   | C64   | -110.1(2)   | C54   | Ni1   | Ni2   | C72   | 111.3(2)    |
| Ni2   | Ni1   | C59   | Ni2   | 0.000(13)   | Ni2   | Ni1   | C59   | Si4   | -23.1(2)    |
| Ni2   | Ni1   | C59   | N3    | -172.6(5)   | C59   | Ni1   | Ni2   | Si3   | -159.13(12) |
| C59   | Ni1   | Ni2   | Si4   | 11.31(12)   | C59   | Ni1   | Ni2   | C59   | 0.00(12)    |
| C59   | Ni1   | Ni2   | C64   | -101.15(13) | C59   | Ni1   | Ni2   | C72   | 120.24(13)  |
| Si3   | Ni1   | C49   | Si1   | -124.9(2)   | Si3   | Ni1   | C49   | Si2   | 137.36(19)  |
| Si3   | Ni1   | C49   | Si3   | 0.00(4)     | C49   | Ni1   | Si3   | Ni2   | -152.13(12) |
| C49   | Ni1   | Si3   | C25   | 105.84(12)  | C49   | Ni1   | Si3   | C31   | -91.09(14)  |
| C49   | Ni1   | Si3   | C49   | 0.00(11)    | C54   | Ni1   | Si3   | Ni2   | 170.43(15)  |
| C54   | Ni1   | Si3   | C25   | 68.40(16)   | C54   | Ni1   | Si3   | C31   | -128.54(17) |
| C54   | Ni1   | Si3   | C49   | -37.44(15)  | Si3   | Ni1   | C59   | Ni2   | -18.76(11)  |
| Si3   | Ni1   | C59   | Si4   | -41.8(3)    | Si3   | Ni1   | C59   | N3    | 168.6(4)    |
| C59   | Ni1   | Si3   | Ni2   | 16.29(10)   | C59   | Ni1   | Si3   | C25   | -85.73(11)  |
| C59   | Ni1   | Si3   | C31   | 77.33(13)   | C59   | Ni1   | Si3   | C49   | 168.42(10)  |
| C54   | Ni1   | C49   | Si1   | 34.58(18)   | C54   | Ni1   | C49   | Si2   | -63.17(16)  |
| C54   | Ni1   | C49   | Si3   | 159.47(11)  | C49   | Ni1   | C59   | Ni2   | -0.5(3)     |
| C49   | Ni1   | C59   | Si4   | -23.6(5)    | C49   | Ni1   | C59   | N3    | -173.1(3)   |
| C59   | Ni1   | C49   | Si1   | -149.0(2)   | C59   | Ni1   | C49   | Si2   | 113.2(2)    |
| C59   | Ni1   | C49   | Si3   | -24.1(3)    | C54   | Ni1   | C59   | Ni2   | 175.88(11)  |
| C54   | Ni1   | C59   | Si4   | 152.8(3)    | C54   | Ni1   | C59   | N3    | 3.3(5)      |
| Ni1   | Ni2   | Si3   | Ni1   | 0.000(10)   | Ni1   | Ni2   | Si3   | C25   | 98.41(4)    |
| Ni1   | Ni2   | Si3   | C31   | -153.79(5)  | Ni1   | Ni2   | Si3   | C49   | -24.53(3)   |

|      |     |      |      |             |      |     |      |      |             |
|------|-----|------|------|-------------|------|-----|------|------|-------------|
| Ni1  | Ni2 | Si4  | N3   | -14.48(4)   | Ni1  | Ni2 | Si4  | C37  | -127.20(5)  |
| Ni1  | Ni2 | Si4  | C43  | 95.58(4)    | Ni1  | Ni2 | Si4  | C59  | -9.41(2)    |
| Ni1  | Ni2 | C59  | Ni1  | 0.000(13)   | Ni1  | Ni2 | C59  | Si4  | 167.68(13)  |
| Ni1  | Ni2 | C59  | N3   | 175.8(3)    | Si3  | Ni2 | C59  | Ni1  | 18.40(10)   |
| Si3  | Ni2 | C59  | Si4  | -173.92(4)  | Si3  | Ni2 | C59  | N3   | -165.78(19) |
| C59  | Ni2 | Si3  | Ni1  | -15.57(9)   | C59  | Ni2 | Si3  | C25  | 82.84(9)    |
| C59  | Ni2 | Si3  | C31  | -169.36(9)  | C59  | Ni2 | Si3  | C49  | -40.09(10)  |
| C64  | Ni2 | Si3  | Ni1  | -139.39(11) | C64  | Ni2 | Si3  | C25  | -40.98(11)  |
| C64  | Ni2 | Si3  | C31  | 66.82(12)   | C64  | Ni2 | Si3  | C49  | -163.91(11) |
| C72  | Ni2 | Si3  | Ni1  | 114.12(9)   | C72  | Ni2 | Si3  | C25  | -147.47(9)  |
| C72  | Ni2 | Si3  | C31  | -39.67(9)   | C72  | Ni2 | Si3  | C49  | 89.60(11)   |
| Si4  | Ni2 | C59  | Ni1  | -167.68(13) | Si4  | Ni2 | C59  | Si4  | -0.00(3)    |
| Si4  | Ni2 | C59  | N3   | 8.14(16)    | C59  | Ni2 | Si4  | N3   | -5.07(10)   |
| C59  | Ni2 | Si4  | C37  | -117.79(11) | C59  | Ni2 | Si4  | C43  | 104.99(10)  |
| C59  | Ni2 | Si4  | C59  | 0.00(10)    | C64  | Ni2 | Si4  | N3   | 120.11(12)  |
| C64  | Ni2 | Si4  | C37  | 7.39(11)    | C64  | Ni2 | Si4  | C43  | -129.83(12) |
| C64  | Ni2 | Si4  | C59  | 125.18(11)  | C72  | Ni2 | Si4  | N3   | -132.11(9)  |
| C72  | Ni2 | Si4  | C37  | 115.18(11)  | C72  | Ni2 | Si4  | C43  | -22.05(10)  |
| C72  | Ni2 | Si4  | C59  | -127.04(9)  | C64  | Ni2 | C59  | Ni1  | 116.00(17)  |
| C64  | Ni2 | C59  | Si4  | -76.32(18)  | C64  | Ni2 | C59  | N3   | -68.2(3)    |
| C72  | Ni2 | C59  | Ni1  | -87.5(2)    | C72  | Ni2 | C59  | Si4  | 80.23(18)   |
| C72  | Ni2 | C59  | N3   | 88.4(3)     | Ni4  | Ni3 | Si7  | Ni4  | 0.0         |
| Ni4  | Ni3 | Si7  | C101 | 101.99(6)   | Ni4  | Ni3 | Si7  | C107 | -72.40(12)  |
| Ni4  | Ni3 | Si7  | C125 | -151.22(3)  | Si7  | Ni3 | Ni4  | Si7  | 0.00(3)     |
| Si7  | Ni3 | Ni4  | Si8  | -158.90(2)  | Si7  | Ni3 | Ni4  | C135 | -161.29(3)  |
| Si7  | Ni3 | Ni4  | C140 | -45.21(5)   | Si7  | Ni3 | Ni4  | C145 | 91.50(7)    |
| Ni4  | Ni3 | C125 | Si5  | 158.73(13)  | Ni4  | Ni3 | C125 | Si6  | -108.43(12) |
| Ni4  | Ni3 | C125 | Si7  | 24.67(9)    | C125 | Ni3 | Ni4  | Si7  | -20.84(7)   |
| C125 | Ni3 | Ni4  | Si8  | -179.74(7)  | C125 | Ni3 | Ni4  | C135 | 177.87(7)   |
| C125 | Ni3 | Ni4  | C140 | -66.05(8)   | C125 | Ni3 | Ni4  | C145 | 70.66(9)    |
| C130 | Ni3 | Ni4  | Si7  | 152.4(2)    | C130 | Ni3 | Ni4  | Si8  | -6.5(2)     |
| C130 | Ni3 | Ni4  | C135 | -8.9(2)     | C130 | Ni3 | Ni4  | C140 | 107.2(2)    |
| C130 | Ni3 | Ni4  | C145 | -116.1(2)   | Ni4  | Ni3 | C135 | Ni4  | -0.00(2)    |
| Ni4  | Ni3 | C135 | Si8  | -5.1(2)     | Ni4  | Ni3 | C135 | N8   | 177.6(4)    |
| C135 | Ni3 | Ni4  | Si7  | 161.29(10)  | C135 | Ni3 | Ni4  | Si8  | 2.39(10)    |
| C135 | Ni3 | Ni4  | C135 | 0.00(10)    | C135 | Ni3 | Ni4  | C140 | 116.08(11)  |
| C135 | Ni3 | Ni4  | C145 | -107.21(12) | Si7  | Ni3 | C125 | Si5  | 134.06(19)  |
| Si7  | Ni3 | C125 | Si6  | -133.10(18) | Si7  | Ni3 | C125 | Si7  | -0.00(4)    |
| C125 | Ni3 | Si7  | Ni4  | 151.22(11)  | C125 | Ni3 | Si7  | C101 | -106.78(12) |

|      |     |      |      |             |      |     |      |      |             |
|------|-----|------|------|-------------|------|-----|------|------|-------------|
| C125 | Ni3 | Si7  | C107 | 78.83(15)   | C125 | Ni3 | Si7  | C125 | -0.00(11)   |
| C130 | Ni3 | Si7  | Ni4  | -160.37(16) | C130 | Ni3 | Si7  | C101 | -58.38(17)  |
| C130 | Ni3 | Si7  | C107 | 127.23(19)  | C130 | Ni3 | Si7  | C125 | 48.41(17)   |
| Si7  | Ni3 | C135 | Ni4  | 16.45(9)    | Si7  | Ni3 | C135 | Si8  | 11.3(3)     |
| Si7  | Ni3 | C135 | N8   | -165.9(3)   | C135 | Ni3 | Si7  | Ni4  | -14.44(8)   |
| C135 | Ni3 | Si7  | C101 | 87.55(10)   | C135 | Ni3 | Si7  | C107 | -86.84(14)  |
| C135 | Ni3 | Si7  | C125 | -165.67(9)  | C130 | Ni3 | C125 | Si5  | -18.22(19)  |
| C130 | Ni3 | C125 | Si6  | 74.62(17)   | C130 | Ni3 | C125 | Si7  | -152.28(12) |
| C125 | Ni3 | C135 | Ni4  | -4.1(2)     | C125 | Ni3 | C135 | Si8  | -9.2(4)     |
| C125 | Ni3 | C135 | N8   | 173.5(3)    | C135 | Ni3 | C125 | Si5  | 161.85(16)  |
| C135 | Ni3 | C125 | Si6  | -105.3(2)   | C135 | Ni3 | C125 | Si7  | 27.8(2)     |
| C130 | Ni3 | C135 | Ni4  | 175.99(11)  | C130 | Ni3 | C135 | Si8  | 170.9(3)    |
| C130 | Ni3 | C135 | N8   | -6.4(4)     | Ni3  | Ni4 | Si7  | Ni3  | 0.000(11)   |
| Ni3  | Ni4 | Si7  | C101 | -95.46(6)   | Ni3  | Ni4 | Si7  | C107 | 153.45(4)   |
| Ni3  | Ni4 | Si7  | C125 | 25.20(4)    | Ni3  | Ni4 | Si8  | N8   | -4.41(3)    |
| Ni3  | Ni4 | Si8  | C113 | 102.87(7)   | Ni3  | Ni4 | Si8  | C119 | -116.15(5)  |
| Ni3  | Ni4 | Si8  | C135 | -1.96(2)    | Ni3  | Ni4 | C135 | Ni3  | 0.00(2)     |
| Ni3  | Ni4 | C135 | Si8  | 177.42(11)  | Ni3  | Ni4 | C135 | N8   | -178.6(2)   |
| Si7  | Ni4 | Si8  | N8   | -58.15(10)  | Si7  | Ni4 | Si8  | C113 | 49.13(13)   |
| Si7  | Ni4 | Si8  | C119 | -169.89(7)  | Si7  | Ni4 | Si8  | C135 | -55.70(9)   |
| Si8  | Ni4 | Si7  | Ni3  | 62.53(10)   | Si8  | Ni4 | Si7  | C101 | -32.93(12)  |
| Si8  | Ni4 | Si7  | C107 | -144.02(9)  | Si8  | Ni4 | Si7  | C125 | 87.72(9)    |
| Si7  | Ni4 | C135 | Ni3  | -16.60(9)   | Si7  | Ni4 | C135 | Si8  | 160.82(3)   |
| Si7  | Ni4 | C135 | N8   | 164.75(16)  | C135 | Ni4 | Si7  | Ni3  | 13.87(8)    |
| C135 | Ni4 | Si7  | C101 | -81.60(10)  | C135 | Ni4 | Si7  | C107 | 167.32(8)   |
| C135 | Ni4 | Si7  | C125 | 39.06(9)    | C140 | Ni4 | Si7  | Ni3  | 146.79(10)  |
| C140 | Ni4 | Si7  | C101 | 51.33(10)   | C140 | Ni4 | Si7  | C107 | -59.76(10)  |
| C140 | Ni4 | Si7  | C125 | 171.99(10)  | C145 | Ni4 | Si7  | Ni3  | -106.94(12) |
| C145 | Ni4 | Si7  | C101 | 157.59(12)  | C145 | Ni4 | Si7  | C107 | 46.51(13)   |
| C145 | Ni4 | Si7  | C125 | -81.75(12)  | Si8  | Ni4 | C135 | Ni3  | -177.42(11) |
| Si8  | Ni4 | C135 | Si8  | 0.00(2)     | Si8  | Ni4 | C135 | N8   | 3.93(14)    |
| C135 | Ni4 | Si8  | N8   | -2.45(9)    | C135 | Ni4 | Si8  | C113 | 104.84(11)  |
| C135 | Ni4 | Si8  | C119 | -114.19(10) | C135 | Ni4 | Si8  | C135 | 0.00(8)     |
| C140 | Ni4 | Si8  | N8   | -139.77(11) | C140 | Ni4 | Si8  | C113 | -32.48(11)  |
| C140 | Ni4 | Si8  | C119 | 108.49(11)  | C140 | Ni4 | Si8  | C135 | -137.32(11) |
| C145 | Ni4 | Si8  | N8   | 111.33(12)  | C145 | Ni4 | Si8  | C113 | -141.38(13) |
| C145 | Ni4 | Si8  | C119 | -0.41(13)   | C145 | Ni4 | Si8  | C135 | 113.78(12)  |
| C140 | Ni4 | C135 | Ni3  | -108.95(18) | C140 | Ni4 | C135 | Si8  | 68.48(19)   |
| C140 | Ni4 | C135 | N8   | 72.4(3)     | C145 | Ni4 | C135 | Ni3  | 93.76(16)   |

|      |     |      |     |             |      |     |      |     |             |
|------|-----|------|-----|-------------|------|-----|------|-----|-------------|
| C145 | Ni4 | C135 | Si8 | -88.82(15)  | C145 | Ni4 | C135 | N8  | -84.9(2)    |
| Si2  | Si1 | N1   | Si2 | -0.00(4)    | Si2  | Si1 | N1   | C50 | -174.2(3)   |
| N1   | Si1 | Si2  | N1  | -0.00(14)   | N1   | Si1 | Si2  | C13 | 85.17(16)   |
| N1   | Si1 | Si2  | C19 | -87.43(16)  | N1   | Si1 | Si2  | C49 | -176.02(15) |
| Si2  | Si1 | C1   | C2  | 168.09(15)  | Si2  | Si1 | C1   | C6  | -15.6(2)    |
| C1   | Si1 | Si2  | N1  | -91.61(14)  | C1   | Si1 | Si2  | C13 | -6.44(13)   |
| C1   | Si1 | Si2  | C19 | -179.04(12) | C1   | Si1 | Si2  | C49 | 92.36(14)   |
| Si2  | Si1 | C7   | C8  | 80.1(2)     | Si2  | Si1 | C7   | C12 | -106.8(2)   |
| C7   | Si1 | Si2  | N1  | 84.44(16)   | C7   | Si1 | Si2  | C13 | 169.61(14)  |
| C7   | Si1 | Si2  | C19 | -2.99(16)   | C7   | Si1 | Si2  | C49 | -91.58(16)  |
| Si2  | Si1 | C49  | Ni1 | -109.10(19) | Si2  | Si1 | C49  | Si2 | -0.00(3)    |
| Si2  | Si1 | C49  | Si3 | 152.4(3)    | C49  | Si1 | Si2  | N1  | 176.02(14)  |
| C49  | Si1 | Si2  | C13 | -98.81(15)  | C49  | Si1 | Si2  | C19 | 88.60(15)   |
| C49  | Si1 | Si2  | C49 | 0.00(12)    | N1   | Si1 | C1   | C2  | 119.1(2)    |
| N1   | Si1 | C1   | C6  | -64.5(2)    | C1   | Si1 | N1   | Si2 | 113.02(16)  |
| C1   | Si1 | N1   | C50 | -61.1(3)    | N1   | Si1 | C7   | C8  | 130.46(19)  |
| N1   | Si1 | C7   | C12 | -56.4(3)    | C7   | Si1 | N1   | Si2 | -126.63(16) |
| C7   | Si1 | N1   | C50 | 59.2(3)     | N1   | Si1 | C49  | Ni1 | -106.37(17) |
| N1   | Si1 | C49  | Si2 | 2.73(13)    | N1   | Si1 | C49  | Si3 | 155.1(2)    |
| C49  | Si1 | N1   | Si2 | -2.90(14)   | C49  | Si1 | N1   | C50 | -177.1(3)   |
| C1   | Si1 | C7   | C8  | -103.3(2)   | C1   | Si1 | C7   | C12 | 69.8(2)     |
| C7   | Si1 | C1   | C2  | -9.0(2)     | C7   | Si1 | C1   | C6  | 167.32(19)  |
| C1   | Si1 | C49  | Ni1 | 136.92(15)  | C1   | Si1 | C49  | Si2 | -113.98(13) |
| C1   | Si1 | C49  | Si3 | 38.4(2)     | C49  | Si1 | C1   | C2  | -139.3(2)   |
| C49  | Si1 | C1   | C6  | 37.1(2)     | C7   | Si1 | C49  | Ni1 | 15.6(2)     |
| C7   | Si1 | C49  | Si2 | 124.69(13)  | C7   | Si1 | C49  | Si3 | -82.9(2)    |
| C49  | Si1 | C7   | C8  | 23.1(3)     | C49  | Si1 | C7   | C12 | -163.72(18) |
| Si1  | Si2 | N1   | Si1 | 0.00(4)     | Si1  | Si2 | N1   | C50 | 174.0(4)    |
| Si1  | Si2 | C13  | C14 | -21.4(3)    | Si1  | Si2 | C13  | C18 | 152.50(18)  |
| Si1  | Si2 | C19  | C20 | 70.9(2)     | Si1  | Si2 | C19  | C24 | -109.6(2)   |
| Si1  | Si2 | C49  | Ni1 | 124.23(18)  | Si1  | Si2 | C49  | Si1 | 0.00(3)     |
| Si1  | Si2 | C49  | Si3 | -145.5(3)   | N1   | Si2 | C13  | C14 | 26.5(3)     |
| N1   | Si2 | C13  | C18 | -159.6(2)   | C13  | Si2 | N1   | Si1 | -118.25(15) |
| C13  | Si2 | N1   | C50 | 55.8(3)     | N1   | Si2 | C19  | C20 | 19.8(3)     |
| N1   | Si2 | C19  | C24 | -160.69(18) | C19  | Si2 | N1   | Si1 | 122.74(14)  |
| C19  | Si2 | N1   | C50 | -63.3(3)    | N1   | Si2 | C49  | Ni1 | 121.47(16)  |
| N1   | Si2 | C49  | Si1 | -2.76(13)   | N1   | Si2 | C49  | Si3 | -148.2(3)   |
| C49  | Si2 | N1   | Si1 | 2.89(14)    | C49  | Si2 | N1   | C50 | 176.9(3)    |
| C13  | Si2 | C19  | C20 | -102.8(3)   | C13  | Si2 | C19  | C24 | 76.7(2)     |

|     |     |     |     |             |     |     |     |      |             |
|-----|-----|-----|-----|-------------|-----|-----|-----|------|-------------|
| C19 | Si2 | C13 | C14 | 152.9(2)    | C19 | Si2 | C13 | C18  | -33.2(3)    |
| C13 | Si2 | C49 | Ni1 | -124.13(17) | C13 | Si2 | C49 | Si1  | 111.64(17)  |
| C13 | Si2 | C49 | Si3 | -33.8(3)    | C49 | Si2 | C13 | C14  | -76.4(3)    |
| C49 | Si2 | C13 | C18 | 97.5(3)     | C19 | Si2 | C49 | Ni1  | 1.0(2)      |
| C19 | Si2 | C49 | Si1 | -123.25(15) | C19 | Si2 | C49 | Si3  | 91.3(3)     |
| C49 | Si2 | C19 | C20 | 125.0(2)    | C49 | Si2 | C19 | C24  | -55.5(3)    |
| Ni1 | Si3 | C25 | C26 | -147.03(16) | Ni1 | Si3 | C25 | C30  | 33.5(2)     |
| Ni1 | Si3 | C31 | C32 | -129.30(17) | Ni1 | Si3 | C31 | C36  | 51.2(4)     |
| Ni1 | Si3 | C49 | Ni1 | 0.00(3)     | Ni1 | Si3 | C49 | Si1  | 122.3(2)    |
| Ni1 | Si3 | C49 | Si2 | -102.2(3)   | Ni2 | Si3 | C25 | C26  | 149.24(16)  |
| Ni2 | Si3 | C25 | C30 | -30.2(2)    | Ni2 | Si3 | C31 | C32  | -77.9(3)    |
| Ni2 | Si3 | C31 | C36 | 102.6(3)    | Ni2 | Si3 | C49 | Ni1  | 25.96(10)   |
| Ni2 | Si3 | C49 | Si1 | 148.21(15)  | Ni2 | Si3 | C49 | Si2  | -76.3(3)    |
| C25 | Si3 | C31 | C32 | 34.0(3)     | C25 | Si3 | C31 | C36  | -145.5(2)   |
| C31 | Si3 | C25 | C26 | 41.4(2)     | C31 | Si3 | C25 | C30  | -138.02(19) |
| C25 | Si3 | C49 | Ni1 | -94.78(13)  | C25 | Si3 | C49 | Si1  | 27.5(2)     |
| C25 | Si3 | C49 | Si2 | 163.0(2)    | C49 | Si3 | C25 | C26  | -88.1(2)    |
| C49 | Si3 | C25 | C30 | 92.5(2)     | C31 | Si3 | C49 | Ni1  | 145.42(14)  |
| C31 | Si3 | C49 | Si1 | -92.3(2)    | C31 | Si3 | C49 | Si2  | 43.2(3)     |
| C49 | Si3 | C31 | C32 | 158.3(2)    | C49 | Si3 | C31 | C36  | -21.2(3)    |
| Ni2 | Si4 | N3  | C59 | 6.27(11)    | Ni2 | Si4 | N3  | C60  | 165.5(3)    |
| Ni2 | Si4 | C37 | C38 | 87.5(3)     | Ni2 | Si4 | C37 | C42  | -90.5(3)    |
| Ni2 | Si4 | C43 | C44 | 154.88(17)  | Ni2 | Si4 | C43 | C48  | -25.8(3)    |
| Ni2 | Si4 | C59 | Ni1 | 24.8(3)     | Ni2 | Si4 | C59 | Ni2  | 0.000(13)   |
| Ni2 | Si4 | C59 | N3  | -171.87(15) | N3  | Si4 | C37 | C38  | -12.8(3)    |
| N3  | Si4 | C37 | C42 | 169.2(2)    | C37 | Si4 | N3  | C59  | 126.51(17)  |
| C37 | Si4 | N3  | C60 | -74.3(3)    | N3  | Si4 | C43 | C44  | -105.9(2)   |
| N3  | Si4 | C43 | C48 | 73.5(2)     | C43 | Si4 | N3  | C59  | -114.64(17) |
| C43 | Si4 | N3  | C60 | 44.6(3)     | N3  | Si4 | C59 | Ni1  | -163.3(4)   |
| N3  | Si4 | C59 | Ni2 | 171.9(2)    | N3  | Si4 | C59 | N3   | 0.00(14)    |
| C59 | Si4 | N3  | C59 | 0.00(12)    | C59 | Si4 | N3  | C60  | 159.2(4)    |
| C37 | Si4 | C43 | C44 | 13.9(3)     | C37 | Si4 | C43 | C48  | -166.7(2)   |
| C43 | Si4 | C37 | C38 | -131.1(3)   | C43 | Si4 | C37 | C42  | 50.9(3)     |
| C37 | Si4 | C59 | Ni1 | 122.8(3)    | C37 | Si4 | C59 | Ni2  | 98.00(17)   |
| C37 | Si4 | C59 | N3  | -73.86(19)  | C59 | Si4 | C37 | C38  | 27.0(3)     |
| C59 | Si4 | C37 | C42 | -151.0(2)   | C43 | Si4 | C59 | Ni1  | -81.1(3)    |
| C43 | Si4 | C59 | Ni2 | -105.88(15) | C43 | Si4 | C59 | N3   | 82.25(17)   |
| C59 | Si4 | C43 | C44 | -146.44(19) | C59 | Si4 | C43 | C48  | 32.9(3)     |
| Si6 | Si5 | N6  | Si6 | 0.00(3)     | Si6 | Si5 | N6  | C126 | 176.5(3)    |



|      |     |      |      |             |      |     |      |      |             |
|------|-----|------|------|-------------|------|-----|------|------|-------------|
| N6   | Si5 | Si6  | N6   | 0.00(13)    | N6   | Si5 | Si6  | C89  | -87.96(15)  |
| N6   | Si5 | Si6  | C95  | 86.19(15)   | N6   | Si5 | Si6  | C125 | 173.68(14)  |
| Si6  | Si5 | C77  | C78  | 149.96(19)  | Si6  | Si5 | C77  | C82  | -22.4(3)    |
| C77  | Si5 | Si6  | N6   | 91.96(14)   | C77  | Si5 | Si6  | C89  | 4.00(14)    |
| C77  | Si5 | Si6  | C95  | 178.15(13)  | C77  | Si5 | Si6  | C125 | -94.36(14)  |
| Si6  | Si5 | C83  | C84  | 114.5(2)    | Si6  | Si5 | C83  | C88  | -73.2(2)    |
| C83  | Si5 | Si6  | N6   | -84.56(17)  | C83  | Si5 | Si6  | C89  | -172.52(15) |
| C83  | Si5 | Si6  | C95  | 1.63(18)    | C83  | Si5 | Si6  | C125 | 89.12(17)   |
| Si6  | Si5 | C125 | Ni3  | 99.95(19)   | Si6  | Si5 | C125 | Si6  | 0.00(3)     |
| Si6  | Si5 | C125 | Si7  | -151.7(3)   | C125 | Si5 | Si6  | N6   | -173.68(13) |
| C125 | Si5 | Si6  | C89  | 98.36(14)   | C125 | Si5 | Si6  | C95  | -87.49(14)  |
| C125 | Si5 | Si6  | C125 | -0.00(12)   | N6   | Si5 | C77  | C78  | -161.6(2)   |
| N6   | Si5 | C77  | C82  | 26.0(3)     | C77  | Si5 | N6   | Si6  | -111.32(16) |
| C77  | Si5 | N6   | C126 | 65.1(3)     | N6   | Si5 | C83  | C84  | 62.8(3)     |
| N6   | Si5 | C83  | C88  | -124.9(2)   | C83  | Si5 | N6   | Si6  | 129.24(15)  |
| C83  | Si5 | N6   | C126 | -54.3(3)    | N6   | Si5 | C125 | Ni3  | 95.61(17)   |
| N6   | Si5 | C125 | Si6  | -4.34(12)   | N6   | Si5 | C125 | Si7  | -156.0(2)   |
| C125 | Si5 | N6   | Si6  | 4.62(13)    | C125 | Si5 | N6   | C126 | -178.9(2)   |
| C77  | Si5 | C83  | C84  | -62.4(2)    | C77  | Si5 | C83  | C88  | 109.8(2)    |
| C83  | Si5 | C77  | C78  | -32.4(3)    | C83  | Si5 | C77  | C82  | 155.2(2)    |
| C77  | Si5 | C125 | Ni3  | -148.74(15) | C77  | Si5 | C125 | Si6  | 111.31(13)  |
| C77  | Si5 | C125 | Si7  | -40.4(2)    | C125 | Si5 | C77  | C78  | 97.3(3)     |
| C125 | Si5 | C77  | C82  | -75.1(3)    | C83  | Si5 | C125 | Ni3  | -28.8(2)    |
| C83  | Si5 | C125 | Si6  | -128.71(13) | C83  | Si5 | C125 | Si7  | 79.6(2)     |
| C125 | Si5 | C83  | C84  | 171.71(18)  | C125 | Si5 | C83  | C88  | -16.1(3)    |
| Si5  | Si6 | N6   | Si5  | 0.00(3)     | Si5  | Si6 | N6   | C126 | -176.5(3)   |
| Si5  | Si6 | C89  | C90  | -25.1(3)    | Si5  | Si6 | C89  | C94  | 150.5(2)    |
| Si5  | Si6 | C95  | C96  | -44.4(3)    | Si5  | Si6 | C95  | C100 | 130.80(18)  |
| Si5  | Si6 | C125 | Ni3  | -126.00(17) | Si5  | Si6 | C125 | Si5  | -0.00(3)    |
| Si5  | Si6 | C125 | Si7  | 150.8(3)    | N6   | Si6 | C89  | C90  | -73.5(3)    |
| N6   | Si6 | C89  | C94  | 102.1(3)    | C89  | Si6 | N6   | Si5  | 116.85(14)  |
| C89  | Si6 | N6   | C126 | -59.6(3)    | N6   | Si6 | C95  | C96  | 5.4(3)      |
| N6   | Si6 | C95  | C100 | -179.42(18) | C95  | Si6 | N6   | Si5  | -122.78(16) |
| C95  | Si6 | N6   | C126 | 60.7(3)     | N6   | Si6 | C125 | Ni3  | -121.66(15) |
| N6   | Si6 | C125 | Si5  | 4.34(12)    | N6   | Si6 | C125 | Si7  | 155.1(2)    |
| C125 | Si6 | N6   | Si5  | -4.60(13)   | C125 | Si6 | N6   | C126 | 178.9(2)    |
| C89  | Si6 | C95  | C96  | 130.7(3)    | C89  | Si6 | C95  | C100 | -54.1(3)    |
| C95  | Si6 | C89  | C90  | 159.5(3)    | C95  | Si6 | C89  | C94  | -25.0(3)    |
| C89  | Si6 | C125 | Ni3  | 121.49(17)  | C89  | Si6 | C125 | Si5  | -112.51(17) |

|      |     |      |      |             |      |     |      |      |             |
|------|-----|------|------|-------------|------|-----|------|------|-------------|
| C89  | Si6 | C125 | Si7  | 38.3(3)     | C125 | Si6 | C89  | C90  | 30.2(3)     |
| C125 | Si6 | C89  | C94  | -154.3(2)   | C95  | Si6 | C125 | Ni3  | -2.5(2)     |
| C95  | Si6 | C125 | Si5  | 123.47(17)  | C95  | Si6 | C125 | Si7  | -85.8(3)    |
| C125 | Si6 | C95  | C96  | -97.9(3)    | C125 | Si6 | C95  | C100 | 77.3(3)     |
| Ni3  | Si7 | C101 | C102 | 158.0(2)    | Ni3  | Si7 | C101 | C106 | -22.8(2)    |
| Ni3  | Si7 | C107 | C108 | 60.3(4)     | Ni3  | Si7 | C107 | C112 | -121.7(2)   |
| Ni3  | Si7 | C125 | Ni3  | -0.000(12)  | Ni3  | Si7 | C125 | Si5  | -128.4(2)   |
| Ni3  | Si7 | C125 | Si6  | 92.8(2)     | Ni4  | Si7 | C101 | C102 | -138.1(2)   |
| Ni4  | Si7 | C101 | C106 | 41.1(2)     | Ni4  | Si7 | C107 | C108 | -1.5(2)     |
| Ni4  | Si7 | C107 | C112 | 176.40(14)  | Ni4  | Si7 | C125 | Ni3  | -27.14(9)   |
| Ni4  | Si7 | C125 | Si5  | -155.51(16) | Ni4  | Si7 | C125 | Si6  | 65.6(2)     |
| C101 | Si7 | C107 | C108 | -114.0(2)   | C101 | Si7 | C107 | C112 | 63.9(2)     |
| C107 | Si7 | C101 | C102 | -24.6(3)    | C107 | Si7 | C101 | C106 | 154.6(2)    |
| C101 | Si7 | C125 | Ni3  | 90.88(14)   | C101 | Si7 | C125 | Si5  | -37.5(2)    |
| C101 | Si7 | C125 | Si6  | -176.35(19) | C125 | Si7 | C101 | C102 | 100.6(2)    |
| C125 | Si7 | C101 | C106 | -80.2(2)    | C107 | Si7 | C125 | Ni3  | -150.83(13) |
| C107 | Si7 | C125 | Si5  | 80.8(2)     | C107 | Si7 | C125 | Si6  | -58.1(3)    |
| C125 | Si7 | C107 | C108 | 124.2(2)    | C125 | Si7 | C107 | C112 | -57.9(2)    |
| Ni4  | Si8 | N8   | C135 | 3.06(9)     | Ni4  | Si8 | N8   | C136 | 167.5(3)    |
| Ni4  | Si8 | C113 | C114 | -29.7(3)    | Ni4  | Si8 | C113 | C118 | 157.6(2)    |
| Ni4  | Si8 | C119 | C120 | -97.3(2)    | Ni4  | Si8 | C119 | C124 | 79.8(2)     |
| Ni4  | Si8 | C135 | Ni3  | 5.5(2)      | Ni4  | Si8 | C135 | Ni4  | 0.000(10)   |
| Ni4  | Si8 | C135 | N8   | -176.05(14) | N8   | Si8 | C113 | C114 | 67.8(3)     |
| N8   | Si8 | C113 | C118 | -104.9(3)   | C113 | Si8 | N8   | C135 | -116.55(15) |
| C113 | Si8 | N8   | C136 | 47.9(3)     | N8   | Si8 | C119 | C120 | 162.6(2)    |
| N8   | Si8 | C119 | C124 | -20.2(3)    | C119 | Si8 | N8   | C135 | 123.91(14)  |
| C119 | Si8 | N8   | C136 | -71.6(3)    | N8   | Si8 | C135 | Ni3  | -178.4(4)   |
| N8   | Si8 | C135 | Ni4  | 176.05(18)  | N8   | Si8 | C135 | N8   | 0.00(12)    |
| C135 | Si8 | N8   | C135 | 0.00(10)    | C135 | Si8 | N8   | C136 | 164.5(4)    |
| C113 | Si8 | C119 | C120 | 46.4(3)     | C113 | Si8 | C119 | C124 | -136.4(2)   |
| C119 | Si8 | C113 | C114 | -173.7(2)   | C119 | Si8 | C113 | C118 | 13.6(3)     |
| C113 | Si8 | C135 | Ni3  | -99.6(3)    | C113 | Si8 | C135 | Ni4  | -105.18(15) |
| C113 | Si8 | C135 | N8   | 78.77(17)   | C135 | Si8 | C113 | C114 | 28.7(3)     |
| C135 | Si8 | C113 | C118 | -144.0(2)   | C119 | Si8 | C135 | Ni3  | 106.4(3)    |
| C119 | Si8 | C135 | Ni4  | 100.89(16)  | C119 | Si8 | C135 | N8   | -75.16(18)  |
| C135 | Si8 | C119 | C120 | -158.02(18) | C135 | Si8 | C119 | C124 | 19.2(3)     |
| Si1  | N1  | C50  | C51  | -80.3(4)    | Si1  | N1  | C50  | C52  | 39.6(4)     |
| Si1  | N1  | C50  | C53  | 158.9(2)    | Si2  | N1  | C50  | C51  | 107.8(3)    |
| Si2  | N1  | C50  | C52  | -132.2(3)   | Si2  | N1  | C50  | C53  | -12.9(5)    |

|      |     |      |      |             |      |     |      |      |             |
|------|-----|------|------|-------------|------|-----|------|------|-------------|
| Si4  | N3  | C59  | Ni1  | 162.0(5)    | Si4  | N3  | C59  | Ni2  | -9.1(2)     |
| Si4  | N3  | C59  | Si4  | 0.00(3)     | Si4  | N3  | C60  | C61  | -92.6(4)    |
| Si4  | N3  | C60  | C62  | 144.5(3)    | Si4  | N3  | C60  | C63  | 26.0(5)     |
| C59  | N3  | C60  | C61  | 60.4(5)     | C59  | N3  | C60  | C62  | -62.5(4)    |
| C59  | N3  | C60  | C63  | 178.9(3)    | C60  | N3  | C59  | Ni1  | -2.0(7)     |
| C60  | N3  | C59  | Ni2  | -173.2(3)   | C60  | N3  | C59  | Si4  | -164.1(4)   |
| Si5  | N6  | C126 | C127 | -46.2(4)    | Si5  | N6  | C126 | C128 | 73.1(4)     |
| Si5  | N6  | C126 | C129 | -167.1(2)   | Si6  | N6  | C126 | C127 | 128.9(3)    |
| Si6  | N6  | C126 | C128 | -111.7(3)   | Si6  | N6  | C126 | C129 | 8.0(4)      |
| Si8  | N8  | C135 | Ni3  | 178.5(4)    | Si8  | N8  | C135 | Ni4  | -4.4(2)     |
| Si8  | N8  | C135 | Si8  | -0.00(3)    | Si8  | N8  | C136 | C137 | 17.7(4)     |
| Si8  | N8  | C136 | C138 | -100.9(4)   | Si8  | N8  | C136 | C139 | 136.0(3)    |
| C135 | N8  | C136 | C137 | 177.8(2)    | C135 | N8  | C136 | C138 | 59.1(4)     |
| C135 | N8  | C136 | C139 | -64.0(4)    | C136 | N8  | C135 | Ni3  | 10.1(6)     |
| C136 | N8  | C135 | Ni4  | -172.8(2)   | C136 | N8  | C135 | Si8  | -168.4(3)   |
| Si1  | C1  | C2   | C3   | 177.52(19)  | Si1  | C1  | C6   | C5   | -176.32(18) |
| C2   | C1  | C6   | C5   | 0.3(4)      | C6   | C1  | C2   | C3   | 1.1(4)      |
| C1   | C2  | C3   | C4   | -1.4(5)     | C2   | C3  | C4   | C5   | 0.2(5)      |
| C3   | C4  | C5   | C6   | 1.1(5)      | C4   | C5  | C6   | C1   | -1.3(5)     |
| Si1  | C7  | C8   | C9   | 172.49(18)  | Si1  | C7  | C12  | C11  | -172.69(19) |
| C8   | C7  | C12  | C11  | 0.6(4)      | C12  | C7  | C8   | C9   | -1.1(4)     |
| C7   | C8  | C9   | C10  | 1.0(4)      | C8   | C9  | C10  | C11  | -0.3(5)     |
| C9   | C10 | C11  | C12  | -0.2(5)     | C10  | C11 | C12  | C7   | 0.0(5)      |
| Si2  | C13 | C14  | C15  | 175.0(2)    | Si2  | C13 | C18  | C17  | -172.5(3)   |
| C14  | C13 | C18  | C17  | 1.6(6)      | C18  | C13 | C14  | C15  | 0.7(5)      |
| C13  | C14 | C15  | C16  | -2.3(7)     | C14  | C15 | C16  | C17  | 1.5(8)      |
| C15  | C16 | C17  | C18  | 0.7(9)      | C16  | C17 | C18  | C13  | -2.3(8)     |
| Si2  | C19 | C20  | C21  | 178.5(2)    | Si2  | C19 | C24  | C23  | -178.4(2)   |
| C20  | C19 | C24  | C23  | 1.1(4)      | C24  | C19 | C20  | C21  | -1.0(5)     |
| C19  | C20 | C21  | C22  | 1.1(5)      | C20  | C21 | C22  | C23  | -1.2(5)     |
| C21  | C22 | C23  | C24  | 1.4(5)      | C22  | C23 | C24  | C19  | -1.3(5)     |
| Si3  | C25 | C26  | C27  | -179.90(17) | Si3  | C25 | C30  | C29  | -179.95(17) |
| C26  | C25 | C30  | C29  | 0.6(4)      | C30  | C25 | C26  | C27  | -0.4(4)     |
| C25  | C26 | C27  | C28  | 0.9(5)      | C26  | C27 | C28  | C29  | -1.5(5)     |
| C27  | C28 | C29  | C30  | 1.6(5)      | C28  | C29 | C30  | C25  | -1.2(5)     |
| Si3  | C31 | C32  | C33  | -179.4(3)   | Si3  | C31 | C36  | C35  | 179.1(2)    |
| C32  | C31 | C36  | C35  | -0.5(6)     | C36  | C31 | C32  | C33  | 0.2(6)      |
| C31  | C32 | C33  | C34  | -0.4(7)     | C32  | C33 | C34  | C35  | 0.9(8)      |
| C33  | C34 | C35  | C36  | -1.2(8)     | C34  | C35 | C36  | C31  | 1.0(7)      |

|     |     |     |     |           |     |     |     |     |           |
|-----|-----|-----|-----|-----------|-----|-----|-----|-----|-----------|
| Si4 | C37 | C38 | C39 | 179.9(3)  | Si4 | C37 | C42 | C41 | 179.5(2)  |
| C38 | C37 | C42 | C41 | 1.4(5)    | C42 | C37 | C38 | C39 | -2.0(6)   |
| C37 | C38 | C39 | C40 | 1.0(7)    | C38 | C39 | C40 | C41 | 0.8(7)    |
| C39 | C40 | C41 | C42 | -1.5(6)   | C40 | C41 | C42 | C37 | 0.3(6)    |
| Si4 | C43 | C44 | C45 | -176.9(3) | Si4 | C43 | C48 | C47 | 179.2(3)  |
| C44 | C43 | C48 | C47 | -1.4(6)   | C48 | C43 | C44 | C45 | 3.8(6)    |
| C43 | C44 | C45 | C46 | -0.7(9)   | C44 | C45 | C46 | C47 | -4.9(10)  |
| C45 | C46 | C47 | C48 | 7.4(9)    | C46 | C47 | C48 | C43 | -4.4(9)   |
| N4  | C65 | C66 | C71 | -110.9(6) | N4  | C65 | C67 | C69 | -77.7(7)  |
| N4  | C65 | C67 | C71 | 99.7(5)   | N4  | C65 | C68 | C70 | -95.3(11) |
| N4  | C65 | C69 | C67 | 116.1(5)  | N4  | C65 | C70 | C68 | 91.8(8)   |
| N4  | C65 | C71 | C66 | 79.2(6)   | N4  | C65 | C71 | C67 | -109.0(4) |
| C66 | C65 | C67 | C69 | 177.2(6)  | C66 | C65 | C67 | C71 | -5.4(6)   |
| C67 | C65 | C66 | C71 | 7.4(8)    | C66 | C65 | C68 | C70 | 13.5(13)  |
| C68 | C65 | C66 | C71 | 133.7(7)  | C66 | C65 | C69 | C67 | -4.7(12)  |
| C69 | C65 | C66 | C71 | 10.6(13)  | C66 | C65 | C70 | C68 | -167.7(8) |
| C70 | C65 | C66 | C71 | 138.3(6)  | C66 | C65 | C71 | C66 | 0.0(6)    |
| C66 | C65 | C71 | C67 | 171.8(9)  | C71 | C65 | C66 | C71 | 0.0(6)    |
| C67 | C65 | C68 | C70 | 131.8(11) | C68 | C65 | C67 | C69 | 52.2(9)   |
| C68 | C65 | C67 | C71 | -130.4(6) | C67 | C65 | C69 | C67 | 0.0(7)    |
| C69 | C65 | C67 | C69 | -0.0(5)   | C69 | C65 | C67 | C71 | 177.4(9)  |
| C67 | C65 | C70 | C68 | -58.5(12) | C70 | C65 | C67 | C69 | 71.2(9)   |
| C70 | C65 | C67 | C71 | -111.4(7) | C67 | C65 | C71 | C66 | -171.8(8) |
| C67 | C65 | C71 | C67 | 0.0(5)    | C71 | C65 | C67 | C69 | -177.4(9) |
| C71 | C65 | C67 | C71 | 0.0(4)    | C68 | C65 | C69 | C67 | -134.9(6) |
| C69 | C65 | C68 | C70 | 164.0(11) | C68 | C65 | C71 | C66 | -72.2(10) |
| C68 | C65 | C71 | C67 | 99.6(9)   | C71 | C65 | C68 | C70 | 56.2(15)  |
| C69 | C65 | C70 | C68 | -16.7(9)  | C70 | C65 | C69 | C67 | -129.2(5) |
| C69 | C65 | C71 | C66 | -173.6(5) | C69 | C65 | C71 | C67 | -1.8(5)   |
| C71 | C65 | C69 | C67 | 2.4(6)    | C70 | C65 | C71 | C66 | -52.4(7)  |
| C70 | C65 | C71 | C67 | 119.4(6)  | C71 | C65 | C70 | C68 | -136.6(8) |
| C65 | C66 | C71 | C65 | 0.00(17)  | C65 | C66 | C71 | C67 | -12.3(13) |
| C65 | C67 | C69 | C65 | -0.00(17) | C65 | C67 | C71 | C65 | -0.0(2)   |
| C65 | C67 | C71 | C66 | 14.2(14)  | C69 | C67 | C71 | C65 | 4.0(16)   |
| C69 | C67 | C71 | C66 | 18(3)     | C71 | C67 | C69 | C65 | -3.4(14)  |
| C65 | C68 | C70 | C65 | -0.00(17) | Si5 | C77 | C78 | C79 | -172.6(2) |
| Si5 | C77 | C82 | C81 | 171.2(2)  | C78 | C77 | C82 | C81 | -1.4(5)   |
| C82 | C77 | C78 | C79 | 0.2(5)    | C77 | C78 | C79 | C80 | 1.0(6)    |
| C78 | C79 | C80 | C81 | -1.1(6)   | C79 | C80 | C81 | C82 | -0.1(7)   |

|      |      |                   |                   |             |      |      |      |                   |            |
|------|------|-------------------|-------------------|-------------|------|------|------|-------------------|------------|
| C80  | C81  | C82               | C77               | 1.3(7)      | Si5  | C83  | C84  | C85               | 173.4(2)   |
| Si5  | C83  | C88               | C87               | -172.89(19) | C84  | C83  | C88  | C87               | -0.1(4)    |
| C88  | C83  | C84               | C85               | 0.9(5)      | C83  | C84  | C85  | C86               | 0.1(6)     |
| C84  | C85  | C86               | C87               | -1.9(6)     | C85  | C86  | C87  | C88               | 2.7(6)     |
| C86  | C87  | C88               | C83               | -1.7(6)     | Si6  | C89  | C90  | C91               | 175.0(3)   |
| Si6  | C89  | C94               | C93               | -175.9(3)   | C90  | C89  | C94  | C93               | -0.2(6)    |
| C94  | C89  | C90               | C91               | -0.9(6)     | C89  | C90  | C91  | C92               | 1.2(8)     |
| C90  | C91  | C92               | C93               | -0.4(9)     | C91  | C92  | C93  | C94               | -0.7(10)   |
| C92  | C93  | C94               | C89               | 1.0(9)      | Si6  | C95  | C96  | C97               | 174.5(2)   |
| Si6  | C95  | C100              | C99               | -174.9(2)   | C96  | C95  | C100 | C99               | 0.7(5)     |
| C100 | C95  | C96               | C97               | -0.7(5)     | C95  | C96  | C97  | C98               | 0.3(7)     |
| C96  | C97  | C98               | C99               | 0.0(9)      | C97  | C98  | C99  | C100              | 0.0(9)     |
| C98  | C99  | C100              | C95               | -0.4(8)     | Si7  | C101 | C102 | C103              | 179.35(19) |
| Si7  | C101 | C106              | C105              | -179.40(19) | C102 | C101 | C106 | C105              | -0.1(4)    |
| C106 | C101 | C102              | C103              | 0.1(4)      | C101 | C102 | C103 | C104              | -0.4(5)    |
| C102 | C103 | C104              | C105              | 0.6(5)      | C103 | C104 | C105 | C106              | -0.6(5)    |
| C104 | C105 | C106              | C101              | 0.3(5)      | Si7  | C107 | C108 | C109              | 177.03(18) |
| Si7  | C107 | C112              | C111              | -177.37(18) | C108 | C107 | C112 | C111              | 0.7(4)     |
| C112 | C107 | C108              | C109              | -0.9(4)     | C107 | C108 | C109 | C110              | 0.3(5)     |
| C108 | C109 | C110              | C111              | 0.5(6)      | C109 | C110 | C111 | C112              | -0.7(6)    |
| C110 | C111 | C112              | C107              | 0.0(5)      | Si8  | C113 | C114 | C115              | -171.9(2)  |
| Si8  | C113 | C118              | C117              | 172.9(2)    | C114 | C113 | C118 | C117              | 0.1(6)     |
| C118 | C113 | C114              | C115              | 1.1(5)      | C113 | C114 | C115 | C116              | -1.4(6)    |
| C114 | C115 | C116              | C117              | 0.4(6)      | C115 | C116 | C117 | C118              | 0.8(7)     |
| C116 | C117 | C118              | C113              | -1.0(7)     | Si8  | C119 | C120 | C121              | 179.5(2)   |
| Si8  | C119 | C124              | C123              | -179.9(2)   | C120 | C119 | C124 | C123              | -2.7(5)    |
| C124 | C119 | C120              | C121              | 2.2(5)      | C119 | C120 | C121 | C122              | -0.3(6)    |
| C120 | C121 | C122              | C123              | -1.3(6)     | C121 | C122 | C123 | C124              | 0.8(6)     |
| C122 | C123 | C124              | C119              | 1.2(6)      | C150 | C151 | C152 | C153              | 180.0(7)   |
| C151 | C152 | C153              | C154              | 173.1(7)    | C157 | C155 | C156 | C156 <sup>1</sup> | -177.6(10) |
| C155 | C156 | C156 <sup>1</sup> | C155 <sup>1</sup> | 180.0(9)    |      |      |      |                   |            |

Symmetry Operators:

(1) -X+1,-Y,-Z+1

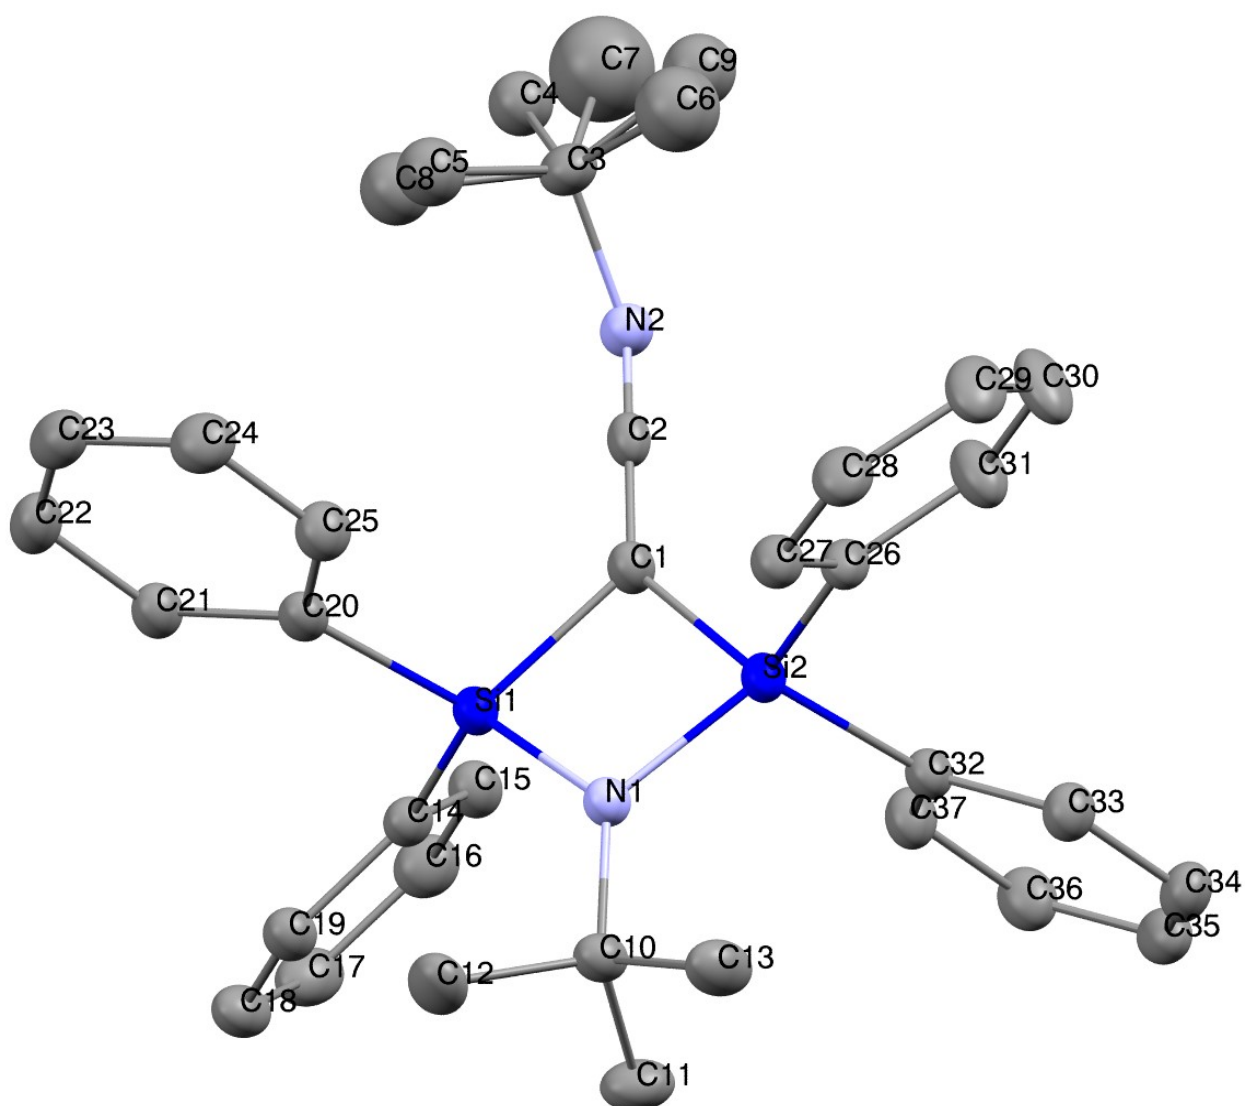

**Figure S9.** ORTEP drawing of **4** (50% probability of the thermal ellipsoids). Hydrogen atoms were omitted for clarity. One <sup>t</sup>Bu group were found to be disordered, and the site occupancy factor for these carbons was defined as follows: 0.7 for C4, C5 and C6, 0.3 for C7, C8 and C9, respectively.

**Table S6-1.** Crystal data and structure refinement for **4**.

|                                       |                                                                                                                                                |
|---------------------------------------|------------------------------------------------------------------------------------------------------------------------------------------------|
| Empirical Formula                     | C <sub>34</sub> H <sub>29</sub> N <sub>2</sub> Si <sub>2</sub>                                                                                 |
| Formula Weight                        | 521.79                                                                                                                                         |
| Crystal Color, Habit                  | colorless, block                                                                                                                               |
| Crystal Dimensions                    | 0.050 X 0.050 X 0.030 mm                                                                                                                       |
| Crystal System                        | triclinic                                                                                                                                      |
| Lattice Type                          | Primitive                                                                                                                                      |
| Lattice Parameters                    | a = 10.310(3) Å<br>b = 12.326(3) Å<br>c = 12.941(3) Å<br>α = 77.219(5) °<br>β = 79.312(6) °<br>γ = 79.801(6) °<br>V = 1560.0(6) Å <sup>3</sup> |
| Space Group                           | P-1 (#2)                                                                                                                                       |
| Z value                               | 2                                                                                                                                              |
| D <sub>calc</sub>                     | 1.111 g/cm <sup>3</sup>                                                                                                                        |
| F <sub>000</sub>                      | 550.00                                                                                                                                         |
| Diffractometer                        | R-Axis IV                                                                                                                                      |
| Radiation (λ = 0.41260Å)              | monochromated                                                                                                                                  |
| Voltage, Current                      | 8kV, 100mA                                                                                                                                     |
| Temperature                           | -173.0°C                                                                                                                                       |
| Detector Aperture                     | 300.0 x 300.0 mm                                                                                                                               |
| Data Images                           | 1440 exposures                                                                                                                                 |
| ω oscillation Range (χ=45.0, φ=0.0)   | 0.0 - 180.0°                                                                                                                                   |
| Exposure Rate                         | 240.0 sec./°                                                                                                                                   |
| Detector Swing Angle                  | 25.00°                                                                                                                                         |
| ω oscillation Range (χ=45.0, φ=90.0)  | 0.0 - 180.0°                                                                                                                                   |
| Exposure Rate                         | 240.0 sec./°                                                                                                                                   |
| Detector Swing Angle                  | 25.00°                                                                                                                                         |
| ω oscillation Range (χ=45.0, φ=180.0) | 0.0 - 180.0°                                                                                                                                   |
| Exposure Rate                         | 240.0 sec./°                                                                                                                                   |
| Detector Swing Angle                  | 25.00°                                                                                                                                         |
| ω oscillation Range (χ=45.0, φ=270.0) | 0.0 - 180.0°                                                                                                                                   |
| Exposure Rate                         | 240.0 sec./°                                                                                                                                   |
| Detector Swing Angle                  | 25.00°                                                                                                                                         |

|                                          |                                                                                                                      |
|------------------------------------------|----------------------------------------------------------------------------------------------------------------------|
| Detector Position                        | 130.00 mm                                                                                                            |
| Pixel Size                               | 0.172 mm                                                                                                             |
| $2\theta_{\max}$                         | 31.0°                                                                                                                |
| No. of Reflections Measured              | Total: 45326<br>Unique: 7039 ( $R_{\text{int}} = 0.0347$ )                                                           |
| Corrections                              | Lorentz-polarization<br>Absorption<br>(trans. factors: 0.825 - 1.000)                                                |
| Structure Solution                       | Direct Methods                                                                                                       |
| Refinement                               | Full-matrix least-squares on $F^2$                                                                                   |
| Function Minimized                       | $\Sigma w (F_o^2 - F_c^2)^2$                                                                                         |
| Least Squares Weights                    | $w = 1 / [ \sigma^2(F_o^2) + (0.0669 \cdot P)^2 + 0.9661 \cdot P ]$<br>where $P = (\text{Max}(F_o^2, 0) + 2F_c^2)/3$ |
| $2\theta_{\max}$ cutoff                  | 31.0°                                                                                                                |
| Anomalous Dispersion                     | All non-hydrogen atoms                                                                                               |
| No. Observations (All reflections)       | 7039                                                                                                                 |
| No. Variables                            | 340                                                                                                                  |
| Reflection/Parameter Ratio               | 20.70                                                                                                                |
| Residuals: $R_1$ ( $I > 2.00\sigma(I)$ ) | 0.0451                                                                                                               |
| Residuals: $R$ (All reflections)         | 0.0507                                                                                                               |
| Residuals: $wR_2$ (All reflections)      | 0.1258                                                                                                               |
| Goodness of Fit Indicator                | 1.028                                                                                                                |
| Max Shift/Error in Final Cycle           | 0.001                                                                                                                |
| Maximum peak in Final Diff. Map          | 0.81 e <sup>-</sup> /Å <sup>3</sup>                                                                                  |
| Minimum peak in Final Diff. Map          | -0.39 e <sup>-</sup> /Å <sup>3</sup>                                                                                 |



**Table S6-2.** Atomic coordinates and  $B_{\text{iso}}/B_{\text{eq}}$  and occupancy

| atom | x            | y           | z           | $B_{\text{eq}}$ | occ      |
|------|--------------|-------------|-------------|-----------------|----------|
| Si1  | 0.34744(4)   | 0.68613(3)  | 0.79373(3)  | 1.407(9)        | 1        |
| Si2  | 0.19158(4)   | 0.87639(3)  | 0.74386(3)  | 1.423(9)        | 1        |
| N1   | 0.25763(12)  | 0.79500(10) | 0.85701(10) | 1.490(19)       | 1        |
| N2   | 0.30596(13)  | 0.71024(11) | 0.48856(10) | 1.75(2)         | 1        |
| C1   | 0.27703(14)  | 0.76287(12) | 0.67046(12) | 1.61(2)         | 1        |
| C2   | 0.28535(14)  | 0.73433(12) | 0.57732(12) | 1.54(2)         | 1        |
| C3   | 0.23529(17)  | 0.63308(14) | 0.45107(13) | 2.13(3)         | 1        |
| C4   | 0.3373(3)    | 0.5889(2)   | 0.3585(2)   | 2.64(4)         | 0.700000 |
| C5   | 0.1960(4)    | 0.5362(3)   | 0.5417(2)   | 2.98(5)         | 0.700000 |
| C6   | 0.0799(9)    | 0.6923(8)   | 0.4636(8)   | 4.57(16)        | 0.300000 |
| C7   | 0.2797(14)   | 0.6367(12)  | 0.3362(11)  | 7.0(3)          | 0.300000 |
| C8   | 0.2472(9)    | 0.5172(7)   | 0.5348(6)   | 3.33(13)        | 0.300000 |
| C9   | 0.1133(3)    | 0.7004(3)   | 0.4046(3)   | 3.42(5)         | 0.700000 |
| C10  | 0.26915(15)  | 0.82378(13) | 0.96049(12) | 1.67(2)         | 1        |
| C11  | 0.39497(16)  | 0.88026(16) | 0.94773(15) | 2.49(3)         | 1        |
| C12  | 0.27845(19)  | 0.71566(15) | 1.04636(13) | 2.55(3)         | 1        |
| C13  | 0.14635(17)  | 0.90507(15) | 0.99588(14) | 2.38(3)         | 1        |
| C14  | 0.53569(14)  | 0.66780(12) | 0.77506(12) | 1.58(2)         | 1        |
| C15  | 0.60697(15)  | 0.71008(13) | 0.67428(13) | 1.90(2)         | 1        |
| C16  | 0.74690(16)  | 0.69624(15) | 0.65612(14) | 2.30(3)         | 1        |
| C17  | 0.81806(16)  | 0.63965(15) | 0.73878(15) | 2.44(3)         | 1        |
| C18  | 0.74948(16)  | 0.59718(14) | 0.83955(14) | 2.21(3)         | 1        |
| C19  | 0.61036(15)  | 0.61099(13) | 0.85715(13) | 1.87(2)         | 1        |
| C20  | 0.29043(15)  | 0.54393(12) | 0.84488(11) | 1.60(2)         | 1        |
| C21  | 0.37973(15)  | 0.44282(13) | 0.84764(12) | 1.80(2)         | 1        |
| C22  | 0.33356(17)  | 0.33813(14) | 0.87300(13) | 2.17(3)         | 1        |
| C23  | 0.19695(17)  | 0.33275(14) | 0.89597(13) | 2.23(3)         | 1        |
| C24  | 0.10635(17)  | 0.43162(15) | 0.89386(14) | 2.32(3)         | 1        |
| C25  | 0.15270(16)  | 0.53576(14) | 0.86898(13) | 2.05(3)         | 1        |
| C26  | 0.00453(14)  | 0.90408(12) | 0.75341(12) | 1.65(2)         | 1        |
| C27  | -0.08238(15) | 0.85332(13) | 0.84075(13) | 1.84(2)         | 1        |
| C28  | -0.22113(16) | 0.87737(14) | 0.84483(14) | 2.22(3)         | 1        |
| C29  | -0.27544(17) | 0.95056(15) | 0.76028(17) | 2.74(3)         | 1        |
| C30  | -0.19132(18) | 0.99957(16) | 0.67115(17) | 3.14(4)         | 1        |
| C31  | -0.05282(17) | 0.97701(15) | 0.66823(15) | 2.55(3)         | 1        |
| C32  | 0.25772(14)  | 1.01459(12) | 0.69093(12) | 1.59(2)         | 1        |

|     |             |             |             |         |   |
|-----|-------------|-------------|-------------|---------|---|
| C33 | 0.18161(15) | 1.11855(13) | 0.70448(13) | 1.91(2) | 1 |
| C34 | 0.23668(17) | 1.21904(13) | 0.66974(13) | 2.18(3) | 1 |
| C35 | 0.36967(17) | 1.21721(14) | 0.62098(13) | 2.17(3) | 1 |
| C36 | 0.44672(16) | 1.11542(14) | 0.60614(14) | 2.24(3) | 1 |
| C37 | 0.39137(15) | 1.01530(13) | 0.64019(13) | 1.98(2) | 1 |

$$B_{eq} = 8/3 \pi^2 (U_{11}(aa^*)^2 + U_{22}(bb^*)^2 + U_{33}(cc^*)^2 + 2U_{12}(aa^*bb^*)\cos \gamma + 2U_{13}(aa^*cc^*)\cos \beta + 2U_{23}(bb^*cc^*)\cos \alpha)$$

**Table S6-3.** Anisotropic displacement parameters

| atom | U <sub>11</sub> | U <sub>22</sub> | U <sub>33</sub> | U <sub>12</sub> | U <sub>13</sub> | U <sub>23</sub> |
|------|-----------------|-----------------|-----------------|-----------------|-----------------|-----------------|
| Si1  | 0.01697(19)     | 0.01759(19)     | 0.01817(19)     | -0.00017(14)    | -0.00307(14)    | -0.00341(14)    |
| Si2  | 0.01594(19)     | 0.01687(19)     | 0.0205(2)       | -0.00109(14)    | -0.00323(14)    | -0.00262(14)    |
| N1   | 0.0177(6)       | 0.0188(6)       | 0.0198(6)       | -0.0007(4)      | -0.0031(4)      | -0.0045(5)      |
| N2   | 0.0238(6)       | 0.0221(6)       | 0.0205(6)       | -0.0046(5)      | -0.0017(5)      | -0.0042(5)      |
| C1   | 0.0199(7)       | 0.0194(7)       | 0.0209(7)       | -0.0010(5)      | -0.0035(5)      | -0.0028(5)      |
| C2   | 0.0171(6)       | 0.0163(6)       | 0.0230(7)       | -0.0023(5)      | -0.0029(5)      | 0.0004(5)       |
| C3   | 0.0302(8)       | 0.0244(8)       | 0.0293(8)       | -0.0068(6)      | -0.0071(6)      | -0.0071(6)      |
| C10  | 0.0193(7)       | 0.0244(7)       | 0.0209(7)       | -0.0013(5)      | -0.0037(5)      | -0.0072(6)      |
| C11  | 0.0245(8)       | 0.0413(10)      | 0.0344(9)       | -0.0086(7)      | -0.0041(7)      | -0.0164(7)      |
| C12  | 0.0440(10)      | 0.0309(9)       | 0.0213(8)       | -0.0019(7)      | -0.0080(7)      | -0.0040(6)      |
| C13  | 0.0250(8)       | 0.0367(9)       | 0.0308(8)       | 0.0049(6)       | -0.0055(6)      | -0.0174(7)      |
| C14  | 0.0185(7)       | 0.0192(7)       | 0.0225(7)       | -0.0006(5)      | -0.0028(5)      | -0.0066(5)      |
| C15  | 0.0220(7)       | 0.0247(7)       | 0.0242(7)       | -0.0006(6)      | -0.0023(6)      | -0.0053(6)      |
| C16  | 0.0230(8)       | 0.0328(9)       | 0.0311(8)       | -0.0052(6)      | 0.0032(6)       | -0.0101(7)      |
| C17  | 0.0181(7)       | 0.0357(9)       | 0.0421(10)      | -0.0015(6)      | -0.0034(6)      | -0.0173(7)      |
| C18  | 0.0239(8)       | 0.0297(8)       | 0.0333(8)       | 0.0022(6)       | -0.0106(6)      | -0.0114(7)      |
| C19  | 0.0235(7)       | 0.0240(7)       | 0.0238(7)       | -0.0004(6)      | -0.0047(6)      | -0.0067(6)      |
| C20  | 0.0218(7)       | 0.0210(7)       | 0.0176(6)       | -0.0018(5)      | -0.0033(5)      | -0.0040(5)      |
| C21  | 0.0220(7)       | 0.0223(7)       | 0.0229(7)       | -0.0003(6)      | -0.0031(6)      | -0.0046(6)      |
| C22  | 0.0324(8)       | 0.0213(7)       | 0.0279(8)       | -0.0011(6)      | -0.0039(6)      | -0.0053(6)      |
| C23  | 0.0356(9)       | 0.0246(8)       | 0.0253(8)       | -0.0100(6)      | -0.0019(6)      | -0.0038(6)      |
| C24  | 0.0248(8)       | 0.0324(9)       | 0.0316(8)       | -0.0084(6)      | -0.0008(6)      | -0.0072(7)      |
| C25  | 0.0219(7)       | 0.0255(8)       | 0.0293(8)       | -0.0015(6)      | -0.0028(6)      | -0.0056(6)      |
| C26  | 0.0170(6)       | 0.0189(7)       | 0.0275(7)       | -0.0021(5)      | -0.0055(6)      | -0.0045(6)      |
| C27  | 0.0204(7)       | 0.0226(7)       | 0.0271(8)       | -0.0037(6)      | -0.0046(6)      | -0.0039(6)      |
| C28  | 0.0204(7)       | 0.0284(8)       | 0.0362(9)       | -0.0072(6)      | -0.0031(6)      | -0.0061(7)      |
| C29  | 0.0190(7)       | 0.0322(9)       | 0.0531(11)      | -0.0046(6)      | -0.0117(7)      | -0.0027(8)      |
| C30  | 0.0255(8)       | 0.0380(10)      | 0.0510(11)      | -0.0060(7)      | -0.0183(8)      | 0.0125(8)       |

|     |           |           |           |            |            |            |
|-----|-----------|-----------|-----------|------------|------------|------------|
| C31 | 0.0242(8) | 0.0325(9) | 0.0366(9) | -0.0068(7) | -0.0097(7) | 0.0071(7)  |
| C32 | 0.0190(7) | 0.0193(7) | 0.0217(7) | -0.0023(5) | -0.0047(5) | -0.0022(5) |
| C33 | 0.0217(7) | 0.0224(7) | 0.0273(8) | -0.0019(6) | -0.0020(6) | -0.0046(6) |
| C34 | 0.0318(8) | 0.0203(7) | 0.0307(8) | -0.0033(6) | -0.0051(7) | -0.0048(6) |
| C35 | 0.0319(8) | 0.0240(8) | 0.0275(8) | -0.0103(6) | -0.0071(6) | 0.0005(6)  |
| C36 | 0.0220(7) | 0.0306(8) | 0.0302(8) | -0.0077(6) | -0.0022(6) | 0.0004(6)  |
| C37 | 0.0195(7) | 0.0233(7) | 0.0298(8) | -0.0015(6) | -0.0026(6) | -0.0020(6) |

The general temperature factor expression:  $\exp(-2\pi^2(a^2U_{11}h^2 + b^2U_{22}k^2 + c^2U_{33}l^2 + 2a*b*U_{12}hk + 2a*c*U_{13}hl + 2b*c*U_{23}kl))$

**Table S6-4.** Bond lengths (Å)

| atom | atom | distance   | atom | atom | distance   |
|------|------|------------|------|------|------------|
| Si1  | Si2  | 2.6228(7)  | Si1  | N1   | 1.7589(13) |
| Si1  | C1   | 1.8669(16) | Si1  | C14  | 1.8897(15) |
| Si1  | C20  | 1.8876(16) | Si2  | N1   | 1.7585(13) |
| Si2  | C1   | 1.8648(16) | Si2  | C26  | 1.8835(15) |
| Si2  | C32  | 1.8862(16) | N1   | C10  | 1.489(2)   |
| N2   | C2   | 1.221(2)   | N2   | C3   | 1.500(3)   |
| C1   | C2   | 1.312(2)   | C3   | C4   | 1.567(3)   |
| C3   | C5   | 1.530(3)   | C3   | C6   | 1.633(9)   |
| C3   | C7   | 1.465(14)  | C3   | C8   | 1.591(7)   |
| C3   | C9   | 1.524(4)   | C4   | C7   | 0.805(13)  |
| C5   | C8   | 0.537(9)   | C6   | C9   | 0.770(10)  |
| C7   | C9   | 1.900(13)  | C10  | C11  | 1.544(3)   |
| C10  | C12  | 1.536(2)   | C10  | C13  | 1.535(2)   |
| C14  | C15  | 1.411(2)   | C14  | C19  | 1.412(2)   |
| C15  | C16  | 1.404(2)   | C16  | C17  | 1.396(3)   |
| C17  | C18  | 1.401(2)   | C18  | C19  | 1.396(2)   |
| C20  | C21  | 1.410(2)   | C20  | C25  | 1.413(2)   |
| C21  | C22  | 1.404(2)   | C22  | C23  | 1.395(2)   |
| C23  | C24  | 1.396(2)   | C24  | C25  | 1.399(3)   |
| C26  | C27  | 1.408(2)   | C26  | C31  | 1.410(2)   |
| C27  | C28  | 1.402(2)   | C28  | C29  | 1.391(3)   |
| C29  | C30  | 1.398(3)   | C30  | C31  | 1.401(3)   |
| C32  | C33  | 1.407(2)   | C32  | C37  | 1.413(2)   |
| C33  | C34  | 1.402(2)   | C34  | C35  | 1.397(2)   |
| C35  | C36  | 1.393(2)   | C36  | C37  | 1.399(2)   |

**Table S6-5.** Bond angles ( $^{\circ}$ )

| atom | atom | atom | angle      | atom | atom | atom | angle      |
|------|------|------|------------|------|------|------|------------|
| Si2  | Si1  | N1   | 41.78(4)   | Si2  | Si1  | C1   | 45.31(5)   |
| Si2  | Si1  | C14  | 125.46(5)  | Si2  | Si1  | C20  | 125.46(5)  |
| N1   | Si1  | C1   | 87.05(7)   | N1   | Si1  | C14  | 118.31(7)  |
| N1   | Si1  | C20  | 115.75(6)  | C1   | Si1  | C14  | 113.30(6)  |
| C1   | Si1  | C20  | 111.97(7)  | C14  | Si1  | C20  | 108.95(6)  |
| Si1  | Si2  | N1   | 41.79(4)   | Si1  | Si2  | C1   | 45.38(5)   |
| Si1  | Si2  | C26  | 129.33(5)  | Si1  | Si2  | C32  | 122.58(5)  |
| N1   | Si2  | C1   | 87.13(7)   | N1   | Si2  | C26  | 117.24(6)  |
| N1   | Si2  | C32  | 114.22(7)  | C1   | Si2  | C26  | 115.51(8)  |
| C1   | Si2  | C32  | 113.69(7)  | C26  | Si2  | C32  | 108.09(6)  |
| Si1  | N1   | Si2  | 96.43(7)   | Si1  | N1   | C10  | 129.98(9)  |
| Si2  | N1   | C10  | 131.25(10) | C2   | N2   | C3   | 126.79(13) |
| Si1  | C1   | Si2  | 89.31(7)   | Si1  | C1   | C2   | 130.65(11) |
| Si2  | C1   | C2   | 139.88(11) | N2   | C2   | C1   | 173.53(16) |
| N2   | C3   | C4   | 104.87(16) | N2   | C3   | C5   | 111.54(19) |
| N2   | C3   | C6   | 103.7(4)   | N2   | C3   | C7   | 109.4(6)   |
| N2   | C3   | C8   | 106.4(4)   | N2   | C3   | C9   | 109.30(18) |
| C4   | C3   | C5   | 111.27(18) | C4   | C3   | C6   | 135.1(4)   |
| C4   | C3   | C7   | 30.5(5)    | C4   | C3   | C8   | 95.5(3)    |
| C4   | C3   | C9   | 108.66(19) | C5   | C3   | C6   | 89.1(3)    |
| C5   | C3   | C7   | 130.8(6)   | C5   | C3   | C8   | 19.7(3)    |
| C5   | C3   | C9   | 111.0(2)   | C6   | C3   | C7   | 106.5(6)   |
| C6   | C3   | C8   | 108.8(4)   | C6   | C3   | C9   | 28.0(4)    |
| C7   | C3   | C8   | 120.8(6)   | C7   | C3   | C9   | 78.9(5)    |
| C8   | C3   | C9   | 129.2(4)   | C3   | C4   | C7   | 67.7(10)   |
| C3   | C5   | C8   | 86.6(8)    | C3   | C6   | C9   | 68.1(7)    |
| C3   | C7   | C4   | 81.8(10)   | C3   | C7   | C9   | 51.9(4)    |
| C4   | C7   | C9   | 132.1(12)  | C3   | C8   | C5   | 73.7(8)    |
| C3   | C9   | C6   | 83.9(7)    | C3   | C9   | C7   | 49.2(4)    |
| C6   | C9   | C7   | 132.2(8)   | N1   | C10  | C11  | 110.04(12) |
| N1   | C10  | C12  | 109.02(14) | N1   | C10  | C13  | 110.18(13) |
| C11  | C10  | C12  | 109.64(14) | C11  | C10  | C13  | 108.79(15) |
| C12  | C10  | C13  | 109.16(12) | Si1  | C14  | C15  | 119.37(11) |
| Si1  | C14  | C19  | 123.07(10) | C15  | C14  | C19  | 117.54(13) |
| C14  | C15  | C16  | 121.32(15) | C15  | C16  | C17  | 119.86(14) |
| C16  | C17  | C18  | 119.84(15) | C17  | C18  | C19  | 120.08(15) |
| C14  | C19  | C18  | 121.36(14) | Si1  | C20  | C21  | 122.34(12) |

|     |     |     |            |     |     |     |            |
|-----|-----|-----|------------|-----|-----|-----|------------|
| Si1 | C20 | C25 | 119.78(11) | C21 | C20 | C25 | 117.39(14) |
| C20 | C21 | C22 | 121.30(14) | C21 | C22 | C23 | 120.00(14) |
| C22 | C23 | C24 | 119.86(16) | C23 | C24 | C25 | 119.99(16) |
| C20 | C25 | C24 | 121.45(14) | Si2 | C26 | C27 | 123.33(11) |
| Si2 | C26 | C31 | 119.06(11) | C27 | C26 | C31 | 117.59(14) |
| C26 | C27 | C28 | 121.31(14) | C27 | C28 | C29 | 120.03(14) |
| C28 | C29 | C30 | 119.83(16) | C29 | C30 | C31 | 119.98(17) |
| C26 | C31 | C30 | 121.22(15) | Si2 | C32 | C33 | 122.84(11) |
| Si2 | C32 | C37 | 119.55(11) | C33 | C32 | C37 | 117.53(14) |
| C32 | C33 | C34 | 121.26(14) | C33 | C34 | C35 | 120.04(14) |
| C34 | C35 | C36 | 119.73(16) | C35 | C36 | C37 | 120.16(15) |
| C32 | C37 | C36 | 121.27(14) |     |     |     |            |

**Table S6-6.** Torsion Angles(°)

(Those having bond angles > 160 or < 20 degrees are excluded.)

| atom1 | atom2 | atom3 | atom4 | angle       | atom1 | atom2 | atom3 | atom4 | angle       |
|-------|-------|-------|-------|-------------|-------|-------|-------|-------|-------------|
| Si2   | Si1   | N1    | Si2   | 0.000(15)   | Si2   | Si1   | N1    | C10   | -163.82(14) |
| N1    | Si1   | Si2   | N1    | 0.00(6)     | N1    | Si1   | Si2   | C1    | -176.84(7)  |
| N1    | Si1   | Si2   | C26   | -88.35(7)   | N1    | Si1   | Si2   | C32   | 90.90(7)    |
| Si2   | Si1   | C1    | Si2   | -0.000(13)  | Si2   | Si1   | C1    | C2    | -176.10(17) |
| C1    | Si1   | Si2   | N1    | 176.84(7)   | C1    | Si1   | Si2   | C1    | -0.00(6)    |
| C1    | Si1   | Si2   | C26   | 88.49(7)    | C1    | Si1   | Si2   | C32   | -92.26(7)   |
| Si2   | Si1   | C14   | C15   | -51.29(14)  | Si2   | Si1   | C14   | C19   | 130.16(9)   |
| C14   | Si1   | Si2   | N1    | -94.39(7)   | C14   | Si1   | Si2   | C1    | 88.77(7)    |
| C14   | Si1   | Si2   | C26   | 177.26(7)   | C14   | Si1   | Si2   | C32   | -3.49(7)    |
| Si2   | Si1   | C20   | C21   | 165.59(7)   | Si2   | Si1   | C20   | C25   | -6.22(13)   |
| C20   | Si1   | Si2   | N1    | 90.19(6)    | C20   | Si1   | Si2   | C1    | -86.66(6)   |
| C20   | Si1   | Si2   | C26   | 1.84(7)     | C20   | Si1   | Si2   | C32   | -178.91(6)  |
| N1    | Si1   | C1    | Si2   | 2.11(6)     | N1    | Si1   | C1    | C2    | -173.99(13) |
| C1    | Si1   | N1    | Si2   | -2.25(7)    | C1    | Si1   | N1    | C10   | -166.07(11) |
| N1    | Si1   | C14   | C15   | -100.27(12) | N1    | Si1   | C14   | C19   | 81.18(12)   |
| C14   | Si1   | N1    | Si2   | 112.72(7)   | C14   | Si1   | N1    | C10   | -51.10(12)  |
| N1    | Si1   | C20   | C21   | -146.71(10) | N1    | Si1   | C20   | C25   | 41.48(13)   |
| C20   | Si1   | N1    | Si2   | -115.27(7)  | C20   | Si1   | N1    | C10   | 80.90(12)   |
| C1    | Si1   | C14   | C15   | -0.58(14)   | C1    | Si1   | C14   | C19   | -179.13(11) |
| C14   | Si1   | C1    | Si2   | -117.55(7)  | C14   | Si1   | C1    | C2    | 66.35(15)   |
| C1    | Si1   | C20   | C21   | 115.65(11)  | C1    | Si1   | C20   | C25   | -56.16(12)  |
| C20   | Si1   | C1    | Si2   | 118.74(7)   | C20   | Si1   | C1    | C2    | -57.36(14)  |
| C14   | Si1   | C20   | C21   | -10.47(13)  | C14   | Si1   | C20   | C25   | 177.72(10)  |

|     |     |     |     |             |     |     |     |     |             |
|-----|-----|-----|-----|-------------|-----|-----|-----|-----|-------------|
| C20 | Si1 | C14 | C15 | 124.77(11)  | C20 | Si1 | C14 | C19 | -53.78(14)  |
| Si1 | Si2 | N1  | Si1 | -0.000(15)  | Si1 | Si2 | N1  | C10 | 163.50(14)  |
| Si1 | Si2 | C1  | Si1 | -0.000(13)  | Si1 | Si2 | C1  | C2  | 175.4(2)    |
| Si1 | Si2 | C26 | C27 | 41.37(15)   | Si1 | Si2 | C26 | C31 | -137.01(8)  |
| Si1 | Si2 | C32 | C33 | -153.28(9)  | Si1 | Si2 | C32 | C37 | 23.29(14)   |
| N1  | Si2 | C1  | Si1 | -2.11(6)    | N1  | Si2 | C1  | C2  | 173.30(16)  |
| C1  | Si2 | N1  | Si1 | 2.25(7)     | C1  | Si2 | N1  | C10 | 165.75(11)  |
| N1  | Si2 | C26 | C27 | -7.15(15)   | N1  | Si2 | C26 | C31 | 174.47(10)  |
| C26 | Si2 | N1  | Si1 | 119.58(7)   | C26 | Si2 | N1  | C10 | -76.91(12)  |
| N1  | Si2 | C32 | C33 | -106.34(12) | N1  | Si2 | C32 | C37 | 70.23(13)   |
| C32 | Si2 | N1  | Si1 | -112.50(7)  | C32 | Si2 | N1  | C10 | 51.01(12)   |
| C1  | Si2 | C26 | C27 | 93.41(13)   | C1  | Si2 | C26 | C31 | -84.98(12)  |
| C26 | Si2 | C1  | Si1 | -121.04(6)  | C26 | Si2 | C1  | C2  | 54.37(17)   |
| C1  | Si2 | C32 | C33 | 155.77(11)  | C1  | Si2 | C32 | C37 | -27.67(14)  |
| C32 | Si2 | C1  | Si1 | 113.15(7)   | C32 | Si2 | C1  | C2  | -71.45(18)  |
| C26 | Si2 | C32 | C33 | 26.11(14)   | C26 | Si2 | C32 | C37 | -157.33(11) |
| C32 | Si2 | C26 | C27 | -137.96(12) | C32 | Si2 | C26 | C31 | 43.65(13)   |
| Si1 | N1  | C10 | C11 | 75.08(14)   | Si1 | N1  | C10 | C12 | -45.19(16)  |
| Si1 | N1  | C10 | C13 | -164.96(8)  | Si2 | N1  | C10 | C11 | -83.31(14)  |
| Si2 | N1  | C10 | C12 | 156.42(9)   | Si2 | N1  | C10 | C13 | 36.65(17)   |
| C2  | N2  | C3  | C4  | -154.51(13) | C2  | N2  | C3  | C5  | -33.96(19)  |
| C2  | N2  | C3  | C6  | 60.54(17)   | C2  | N2  | C3  | C7  | 173.84(13)  |
| C2  | N2  | C3  | C8  | -54.09(18)  | C2  | N2  | C3  | C9  | 89.15(16)   |
| N2  | C3  | C4  | C7  | -103.1(2)   | N2  | C3  | C5  | C8  | -78.4(4)    |
| N2  | C3  | C6  | C9  | 105.5(7)    | N2  | C3  | C7  | C4  | 86.4(11)    |
| N2  | C3  | C7  | C9  | -106.7(2)   | N2  | C3  | C8  | C5  | 108.2(9)    |
| N2  | C3  | C9  | C6  | -82.8(3)    | N2  | C3  | C9  | C7  | 106.88(13)  |
| C4  | C3  | C5  | C8  | 38.3(5)     | C5  | C3  | C4  | C7  | 136.2(3)    |
| C4  | C3  | C6  | C9  | -22.7(10)   | C6  | C3  | C4  | C7  | 24.7(6)     |
| C4  | C3  | C7  | C4  | -0.0(2)     | C4  | C3  | C7  | C9  | 166.8(12)   |
| C7  | C3  | C4  | C7  | 0.0(12)     | C4  | C3  | C8  | C5  | -144.5(9)   |
| C8  | C3  | C4  | C7  | 148.3(4)    | C4  | C3  | C9  | C6  | 163.3(3)    |
| C4  | C3  | C9  | C7  | -7.02(14)   | C9  | C3  | C4  | C7  | 13.7(3)     |
| C5  | C3  | C6  | C9  | -142.6(7)   | C6  | C3  | C5  | C8  | 177.2(6)    |
| C5  | C3  | C7  | C4  | -58.6(14)   | C5  | C3  | C7  | C9  | 108.3(5)    |
| C7  | C3  | C5  | C8  | 66.0(9)     | C5  | C3  | C9  | C6  | 40.6(3)     |
| C5  | C3  | C9  | C7  | -129.7(2)   | C9  | C3  | C5  | C8  | 159.4(4)    |
| C6  | C3  | C7  | C4  | -162.1(10)  | C6  | C3  | C7  | C9  | 4.7(5)      |
| C7  | C3  | C6  | C9  | -9.9(10)    | C6  | C3  | C8  | C5  | -2.9(12)    |

|     |     |     |     |             |     |     |     |     |             |
|-----|-----|-----|-----|-------------|-----|-----|-----|-----|-------------|
| C8  | C3  | C6  | C9  | -141.6(7)   | C6  | C3  | C9  | C6  | -0.0(8)     |
| C6  | C3  | C9  | C7  | -170.3(8)   | C9  | C3  | C6  | C9  | -0.0(3)     |
| C7  | C3  | C8  | C5  | -126.4(11)  | C8  | C3  | C7  | C4  | -37.6(14)   |
| C8  | C3  | C7  | C9  | 129.3(5)    | C7  | C3  | C9  | C6  | 170.3(7)    |
| C7  | C3  | C9  | C7  | -0.0(6)     | C9  | C3  | C7  | C4  | -166.8(12)  |
| C9  | C3  | C7  | C9  | 0.00(13)    | C8  | C3  | C9  | C6  | 49.4(5)     |
| C8  | C3  | C9  | C7  | -120.9(5)   | C9  | C3  | C8  | C5  | -25.0(12)   |
| C3  | C4  | C7  | C3  | -0.00(8)    | C3  | C4  | C7  | C9  | -14.0(13)   |
| C3  | C5  | C8  | C3  | 0.00(7)     | C3  | C6  | C9  | C3  | 0.00(7)     |
| C3  | C6  | C9  | C7  | 9.9(9)      | C3  | C7  | C9  | C3  | -0.00(9)    |
| C3  | C7  | C9  | C6  | -13.1(9)    | C4  | C7  | C9  | C3  | 17.7(17)    |
| C4  | C7  | C9  | C6  | 5(3)        | Si1 | C14 | C15 | C16 | -178.61(10) |
| Si1 | C14 | C19 | C18 | 178.66(10)  | C15 | C14 | C19 | C18 | 0.1(2)      |
| C19 | C14 | C15 | C16 | 0.0(2)      | C14 | C15 | C16 | C17 | 0.0(3)      |
| C15 | C16 | C17 | C18 | -0.2(3)     | C16 | C17 | C18 | C19 | 0.3(3)      |
| C17 | C18 | C19 | C14 | -0.2(3)     | Si1 | C20 | C21 | C22 | -171.79(10) |
| Si1 | C20 | C25 | C24 | 171.74(10)  | C21 | C20 | C25 | C24 | -0.5(2)     |
| C25 | C20 | C21 | C22 | 0.2(2)      | C20 | C21 | C22 | C23 | 0.1(2)      |
| C21 | C22 | C23 | C24 | -0.1(2)     | C22 | C23 | C24 | C25 | -0.1(3)     |
| C23 | C24 | C25 | C20 | 0.4(3)      | Si2 | C26 | C27 | C28 | 179.37(11)  |
| Si2 | C26 | C31 | C30 | 179.48(12)  | C27 | C26 | C31 | C30 | 1.0(3)      |
| C31 | C26 | C27 | C28 | -2.2(2)     | C26 | C27 | C28 | C29 | 1.6(3)      |
| C27 | C28 | C29 | C30 | 0.3(3)      | C28 | C29 | C30 | C31 | -1.5(3)     |
| C29 | C30 | C31 | C26 | 0.8(3)      | Si2 | C32 | C33 | C34 | 176.10(10)  |
| Si2 | C32 | C37 | C36 | -175.77(10) | C33 | C32 | C37 | C36 | 1.0(2)      |
| C37 | C32 | C33 | C34 | -0.5(2)     | C32 | C33 | C34 | C35 | -0.3(3)     |
| C33 | C34 | C35 | C36 | 0.6(3)      | C34 | C35 | C36 | C37 | -0.2(3)     |
| C35 | C36 | C37 | C32 | -0.6(3)     |     |     |     |     |             |

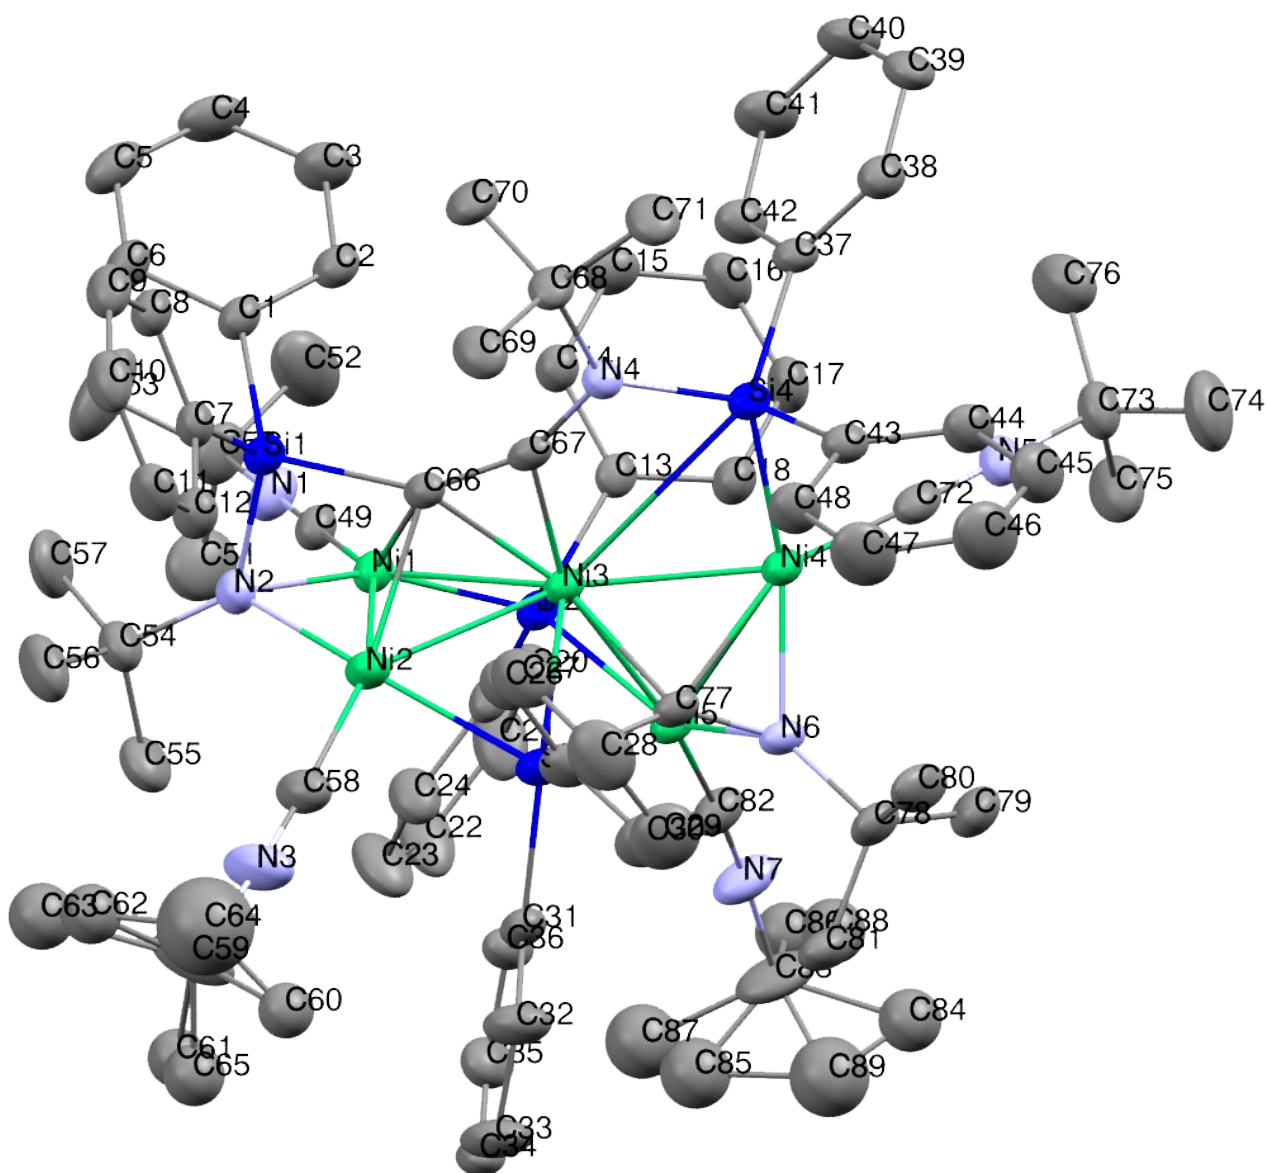

**Figure S10.** ORTEP drawing of **5** (50% probability of the thermal ellipsoids). Hydrogen atoms were omitted for clarity. Two *t*Bu groups were found to be disordered, and the site occupancy factor for six methyl groups was defined to be 0.5.



**Table S7-1.** Crystal data and structure refinement for **5**.

|                                       |                                                                                                                                                     |
|---------------------------------------|-----------------------------------------------------------------------------------------------------------------------------------------------------|
| Empirical Formula                     | C <sub>83</sub> H <sub>103</sub> N <sub>7</sub> Ni <sub>5</sub> Si <sub>4</sub>                                                                     |
| Formula Weight                        | 1604.62                                                                                                                                             |
| Crystal Color, Habit                  | darkred, platelet                                                                                                                                   |
| Crystal Dimensions                    | 0.100 X 0.100 X 0.010 mm                                                                                                                            |
| Crystal System                        | triclinic                                                                                                                                           |
| Lattice Type                          | Primitive                                                                                                                                           |
| Lattice Parameters                    | a = 13.9645(4) Å<br>b = 14.7686(3) Å<br>c = 24.4091(5) Å<br>α = 89.5959(19) °<br>β = 79.412(2) °<br>γ = 63.052(3) °<br>V = 4394.3(2) Å <sup>3</sup> |
| Space Group                           | P-1 (#2)                                                                                                                                            |
| Z value                               | 2                                                                                                                                                   |
| D <sub>calc</sub>                     | 1.213 g/cm <sup>3</sup>                                                                                                                             |
| F <sub>000</sub>                      | 1692.00                                                                                                                                             |
| μ(MoKα)                               | 11.492 cm <sup>-1</sup>                                                                                                                             |
| Diffractometer                        | Saturn724                                                                                                                                           |
| Radiation                             | MoKα (λ = 0.71075 Å)<br>graphite monochromated                                                                                                      |
| Temperature                           | -160.0°C                                                                                                                                            |
| Detector Aperture                     | 72.8 x 72.8 mm                                                                                                                                      |
| Data Images                           | 1440 exposures                                                                                                                                      |
| ω oscillation Range (χ=45.0, φ=0.0)   | -70.0 - 110.0°                                                                                                                                      |
| Exposure Rate                         | 32.0 sec./°                                                                                                                                         |
| Detector Swing Angle                  | 20.00°                                                                                                                                              |
| ω oscillation Range (χ=45.0, φ=90.0)  | -70.0 - 110.0°                                                                                                                                      |
| Exposure Rate                         | 32.0 sec./°                                                                                                                                         |
| Detector Swing Angle                  | 20.00°                                                                                                                                              |
| ω oscillation Range (χ=45.0, φ=180.0) | -70.0 - 110.0°                                                                                                                                      |
| Exposure Rate                         | 32.0 sec./°                                                                                                                                         |
| Detector Swing Angle                  | 20.00°                                                                                                                                              |
| ω oscillation Range (χ=45.0, φ=270.0) | -70.0 - 110.0°                                                                                                                                      |
| Exposure Rate                         | 32.0 sec./°                                                                                                                                         |
| Detector Swing Angle                  | 20.00°                                                                                                                                              |

|                                          |                                                                                                                      |
|------------------------------------------|----------------------------------------------------------------------------------------------------------------------|
| Detector Position                        | 0.00 mm                                                                                                              |
| Pixel Size                               | 0.035 mm                                                                                                             |
| $2\theta_{\max}$                         | 62.4°                                                                                                                |
| No. of Reflections Measured              | Total: 83661<br>Unique: 25607 ( $R_{\text{int}} = 0.0676$ )                                                          |
| Corrections                              | Lorentz-polarization<br>Absorption<br>(trans. factors: 0.882 - 0.989)                                                |
| Structure Solution                       | Direct Methods (SHELXT Version 2014/5)                                                                               |
| Refinement                               | Full-matrix least-squares on $F^2$                                                                                   |
| Function Minimized                       | $\Sigma w (F_o^2 - F_c^2)^2$                                                                                         |
| Least Squares Weights                    | $w = 1 / [ \sigma^2(F_o^2) + (0.0707 \cdot P)^2 + 0.0000 \cdot P ]$<br>where $P = (\text{Max}(F_o^2, 0) + 2F_c^2)/3$ |
| $2\theta_{\max}$ cutoff                  | 62.4°                                                                                                                |
| Anomalous Dispersion                     | All non-hydrogen atoms                                                                                               |
| No. Observations (All reflections)       | 25607                                                                                                                |
| No. Variables                            | 886                                                                                                                  |
| Reflection/Parameter Ratio               | 28.90                                                                                                                |
| Residuals: $R_1$ ( $I > 2.00\sigma(I)$ ) | 0.0591                                                                                                               |
| Residuals: $R$ (All reflections)         | 0.1147                                                                                                               |
| Residuals: $wR_2$ (All reflections)      | 0.1462                                                                                                               |
| Goodness of Fit Indicator                | 0.981                                                                                                                |
| Max Shift/Error in Final Cycle           | 0.001                                                                                                                |
| Maximum peak in Final Diff. Map          | 0.82 e <sup>-</sup> /Å <sup>3</sup>                                                                                  |
| Minimum peak in Final Diff. Map          | -0.43 e <sup>-</sup> /Å <sup>3</sup>                                                                                 |

**Table S7-2.** Atomic coordinates and  $B_{\text{iso}}/B_{\text{eq}}$  and occupancy

| atom | x          | y           | z           | $B_{\text{eq}}$ | occ |
|------|------------|-------------|-------------|-----------------|-----|
| Ni1  | 0.71526(3) | 0.67216(3)  | 0.32618(2)  | 1.862(8)        | 1   |
| Ni2  | 0.70568(3) | 0.81006(3)  | 0.26213(2)  | 2.075(8)        | 1   |
| Ni3  | 0.64033(3) | 0.68168(3)  | 0.23767(2)  | 1.593(7)        | 1   |
| Ni4  | 0.58556(3) | 0.59855(3)  | 0.17150(2)  | 1.699(7)        | 1   |
| Ni5  | 0.78953(3) | 0.51846(3)  | 0.18846(2)  | 1.896(8)        | 1   |
| Si1  | 0.56558(7) | 0.86202(6)  | 0.36208(4)  | 1.852(14)       | 1   |
| Si2  | 0.76467(7) | 0.51998(6)  | 0.28227(3)  | 1.776(14)       | 1   |
| Si3  | 0.73238(7) | 0.75876(7)  | 0.17012(4)  | 2.138(16)       | 1   |
| Si4  | 0.41767(7) | 0.70660(6)  | 0.21140(3)  | 1.647(13)       | 1   |
| N1   | 0.7702(2)  | 0.5574(2)   | 0.42308(12) | 2.75(5)         | 1   |
| N2   | 0.7058(2)  | 0.80924(19) | 0.34365(11) | 2.10(5)         | 1   |
| N3   | 0.8232(3)  | 0.9238(2)   | 0.21684(16) | 4.07(7)         | 1   |
| N4   | 0.4017(2)  | 0.81114(18) | 0.25451(10) | 1.76(4)         | 1   |
| N5   | 0.5071(2)  | 0.4504(2)   | 0.15003(12) | 2.44(5)         | 1   |
| N6   | 0.7242(2)  | 0.56776(19) | 0.12478(10) | 1.91(4)         | 1   |
| N7   | 0.9863(3)  | 0.3212(2)   | 0.15767(12) | 3.30(6)         | 1   |
| C1   | 0.5031(3)  | 0.8214(2)   | 0.42683(13) | 1.96(5)         | 1   |
| C2   | 0.4701(3)  | 0.7476(2)   | 0.42058(14) | 2.31(6)         | 1   |
| C3   | 0.4248(3)  | 0.7133(3)   | 0.46664(15) | 3.03(7)         | 1   |
| C4   | 0.4141(3)  | 0.7525(3)   | 0.51983(15) | 3.28(7)         | 1   |
| C5   | 0.4465(3)  | 0.8251(3)   | 0.52732(15) | 3.15(7)         | 1   |
| C6   | 0.4898(3)  | 0.8599(3)   | 0.48163(13) | 2.60(6)         | 1   |
| C7   | 0.4876(3)  | 1.0057(2)   | 0.36515(13) | 2.04(5)         | 1   |
| C8   | 0.3926(3)  | 1.0637(2)   | 0.40472(14) | 2.21(6)         | 1   |
| C9   | 0.3329(3)  | 1.1688(3)   | 0.40309(15) | 2.68(6)         | 1   |
| C10  | 0.3676(3)  | 1.2174(3)   | 0.36151(16) | 2.83(6)         | 1   |
| C11  | 0.4607(3)  | 1.1612(3)   | 0.32137(15) | 2.85(6)         | 1   |
| C12  | 0.5195(3)  | 1.0579(3)   | 0.32335(15) | 2.61(6)         | 1   |
| C13  | 0.6729(2)  | 0.4582(2)   | 0.30738(12) | 1.82(5)         | 1   |
| C14  | 0.6056(3)  | 0.4849(2)   | 0.36012(13) | 2.22(6)         | 1   |
| C15  | 0.5431(3)  | 0.4355(3)   | 0.38035(15) | 2.73(6)         | 1   |
| C16  | 0.5473(3)  | 0.3589(3)   | 0.34739(15) | 2.85(6)         | 1   |
| C17  | 0.6116(3)  | 0.3319(3)   | 0.29497(15) | 2.95(7)         | 1   |
| C18  | 0.6729(3)  | 0.3809(3)   | 0.27486(14) | 2.61(6)         | 1   |
| C19  | 0.9030(3)  | 0.4247(2)   | 0.29855(13) | 2.29(6)         | 1   |
| C20  | 0.9246(3)  | 0.3273(3)   | 0.31365(15) | 2.86(6)         | 1   |
| C21  | 1.0276(3)  | 0.2585(3)   | 0.32250(19) | 4.13(9)         | 1   |

|     |           |           |             |          |     |
|-----|-----------|-----------|-------------|----------|-----|
| C22 | 1.1109(3) | 0.2853(3) | 0.3166(2)   | 4.81(11) | 1   |
| C23 | 1.0915(3) | 0.3815(3) | 0.3020(2)   | 4.42(10) | 1   |
| C24 | 0.9886(3) | 0.4497(3) | 0.29303(16) | 3.14(7)  | 1   |
| C25 | 0.6537(3) | 0.8708(3) | 0.13094(14) | 2.58(6)  | 1   |
| C26 | 0.5689(3) | 0.9596(3) | 0.16047(16) | 2.83(6)  | 1   |
| C27 | 0.5080(3) | 1.0439(3) | 0.13376(18) | 3.55(8)  | 1   |
| C28 | 0.5316(4) | 1.0409(3) | 0.07660(19) | 4.10(9)  | 1   |
| C29 | 0.6143(4) | 0.9537(3) | 0.04561(18) | 4.32(9)  | 1   |
| C30 | 0.6730(3) | 0.8705(3) | 0.07292(16) | 3.58(8)  | 1   |
| C31 | 0.8849(3) | 0.7052(3) | 0.14005(13) | 2.42(6)  | 1   |
| C32 | 0.9297(3) | 0.7502(3) | 0.10007(16) | 3.47(8)  | 1   |
| C33 | 1.0422(3) | 0.7112(3) | 0.08245(18) | 4.00(9)  | 1   |
| C34 | 1.1120(3) | 0.6263(3) | 0.10478(16) | 3.37(8)  | 1   |
| C35 | 1.0700(3) | 0.5803(3) | 0.14371(16) | 3.36(7)  | 1   |
| C36 | 0.9569(3) | 0.6200(3) | 0.16142(14) | 2.77(6)  | 1   |
| C37 | 0.3239(2) | 0.6579(2) | 0.25060(13) | 1.92(5)  | 1   |
| C38 | 0.2274(3) | 0.6671(3) | 0.23659(14) | 2.39(6)  | 1   |
| C39 | 0.1627(3) | 0.6294(3) | 0.26860(16) | 2.98(7)  | 1   |
| C40 | 0.1928(3) | 0.5829(3) | 0.31603(17) | 3.43(7)  | 1   |
| C41 | 0.2880(3) | 0.5706(3) | 0.33024(16) | 3.29(7)  | 1   |
| C42 | 0.3530(3) | 0.6068(3) | 0.29764(14) | 2.53(6)  | 1   |
| C43 | 0.3773(3) | 0.7581(2) | 0.14373(13) | 2.07(5)  | 1   |
| C44 | 0.3428(3) | 0.7113(3) | 0.10769(14) | 2.62(6)  | 1   |
| C45 | 0.3255(3) | 0.7456(3) | 0.05550(16) | 3.78(8)  | 1   |
| C46 | 0.3439(4) | 0.8256(4) | 0.03743(17) | 4.43(9)  | 1   |
| C47 | 0.3798(4) | 0.8727(3) | 0.07179(17) | 3.90(8)  | 1   |
| C48 | 0.3963(3) | 0.8386(3) | 0.12426(14) | 2.71(6)  | 1   |
| C49 | 0.7510(3) | 0.5998(2) | 0.38323(13) | 2.15(5)  | 1   |
| C50 | 0.7955(3) | 0.5032(3) | 0.47246(15) | 3.12(7)  | 1   |
| C51 | 0.9201(4) | 0.4395(4) | 0.46108(19) | 4.61(9)  | 1   |
| C52 | 0.7385(4) | 0.4376(4) | 0.4799(2)   | 5.56(12) | 1   |
| C53 | 0.7570(5) | 0.5806(4) | 0.52163(17) | 5.86(13) | 1   |
| C54 | 0.7834(3) | 0.8241(3) | 0.37195(16) | 2.92(7)  | 1   |
| C55 | 0.8997(3) | 0.7515(3) | 0.34200(18) | 3.77(8)  | 1   |
| C56 | 0.7666(4) | 0.9326(3) | 0.3701(2)   | 4.29(9)  | 1   |
| C57 | 0.7665(4) | 0.8032(4) | 0.43319(17) | 4.49(9)  | 1   |
| C58 | 0.7788(3) | 0.8765(3) | 0.23375(16) | 2.90(7)  | 1   |
| C59 | 0.8788(3) | 0.9854(3) | 0.2000(2)   | 4.59(10) | 1   |
| C60 | 0.8581(6) | 1.0166(6) | 0.1359(3)   | 3.40(14) | 1/2 |

|     |            |            |             |          |     |
|-----|------------|------------|-------------|----------|-----|
| C61 | 1.0031(8)  | 0.9054(7)  | 0.1954(4)   | 3.81(19) | 1/2 |
| C62 | 0.8367(7)  | 1.0745(7)  | 0.2353(4)   | 3.99(16) | 1/2 |
| C63 | 0.8758(8)  | 1.0461(8)  | 0.2629(4)   | 4.85(19) | 1/2 |
| C64 | 0.7984(14) | 1.0733(13) | 0.1829(7)   | 10.3(4)  | 1/2 |
| C65 | 0.9948(8)  | 0.9284(8)  | 0.1768(4)   | 4.1(2)   | 1/2 |
| C66 | 0.5602(2)  | 0.8011(2)  | 0.29766(12) | 1.74(5)  | 1   |
| C67 | 0.4987(2)  | 0.7865(2)  | 0.26816(12) | 1.71(5)  | 1   |
| C68 | 0.3015(3)  | 0.9068(2)  | 0.28142(14) | 2.28(6)  | 1   |
| C69 | 0.3224(3)  | 0.9985(2)  | 0.26799(16) | 2.89(7)  | 1   |
| C70 | 0.2776(3)  | 0.9002(3)  | 0.34420(14) | 3.01(7)  | 1   |
| C71 | 0.2045(3)  | 0.9174(3)  | 0.25715(16) | 3.06(7)  | 1   |
| C72 | 0.5368(3)  | 0.5098(3)  | 0.15678(13) | 2.20(6)  | 1   |
| C73 | 0.4789(3)  | 0.3680(3)  | 0.14474(16) | 2.93(7)  | 1   |
| C74 | 0.4261(4)  | 0.3808(4)  | 0.0945(2)   | 4.97(10) | 1   |
| C75 | 0.5854(3)  | 0.2697(3)  | 0.13682(19) | 4.04(8)  | 1   |
| C76 | 0.4000(4)  | 0.3743(3)  | 0.19839(19) | 4.39(9)  | 1   |
| C77 | 0.6994(2)  | 0.6498(2)  | 0.15866(12) | 1.82(5)  | 1   |
| C78 | 0.7597(3)  | 0.5457(3)  | 0.06326(13) | 2.66(6)  | 1   |
| C79 | 0.7726(3)  | 0.4392(3)  | 0.05105(16) | 3.51(8)  | 1   |
| C80 | 0.6705(3)  | 0.6227(3)  | 0.03637(14) | 3.36(7)  | 1   |
| C81 | 0.8672(3)  | 0.5480(3)  | 0.04315(14) | 3.19(7)  | 1   |
| C82 | 0.9055(3)  | 0.3948(3)  | 0.17239(14) | 2.62(6)  | 1   |
| C83 | 1.0923(3)  | 0.2378(3)  | 0.13426(18) | 4.33(9)  | 1   |
| C84 | 1.0811(7)  | 0.2133(7)  | 0.0695(4)   | 4.32(17) | 1/2 |
| C85 | 1.1742(9)  | 0.2702(8)  | 0.1298(5)   | 5.4(2)   | 1/2 |
| C86 | 1.1105(8)  | 0.1469(8)  | 0.1674(4)   | 4.1(2)   | 1/2 |
| C87 | 1.1811(9)  | 0.2580(9)  | 0.1658(5)   | 6.0(2)   | 1/2 |
| C88 | 1.0949(9)  | 0.1379(8)  | 0.1502(5)   | 4.6(2)   | 1/2 |
| C89 | 1.1297(10) | 0.2557(10) | 0.0751(5)   | 6.9(3)   | 1/2 |

$$B_{eq} = 8/3 \pi^2(U_{11}(aa^*)^2 + U_{22}(bb^*)^2 + U_{33}(cc^*)^2 + 2U_{12}(aa^*bb^*)\cos \gamma + 2U_{13}(aa^*cc^*)\cos \beta + 2U_{23}(bb^*cc^*)\cos \alpha)$$

**Table S7-3.** Anisotropic displacement parameters

| atom | U <sub>11</sub> | U <sub>22</sub> | U <sub>33</sub> | U <sub>12</sub> | U <sub>13</sub> | U <sub>23</sub> |
|------|-----------------|-----------------|-----------------|-----------------|-----------------|-----------------|
| Ni1  | 0.0245(2)       | 0.0229(2)       | 0.0205(2)       | -0.00815(17)    | -0.00523(16)    | 0.00123(15)     |
| Ni2  | 0.0268(2)       | 0.0264(2)       | 0.0248(2)       | -0.01392(18)    | 0.00123(17)     | 0.00058(16)     |
| Ni3  | 0.01901(19)     | 0.02044(19)     | 0.01700(18)     | -0.00645(16)    | -0.00130(15)    | 0.00184(14)     |
| Ni4  | 0.0200(2)       | 0.0222(2)       | 0.01844(19)     | -0.00703(16)    | -0.00188(15)    | 0.00120(15)     |
| Ni5  | 0.0205(2)       | 0.0236(2)       | 0.01895(19)     | -0.00313(16)    | -0.00203(16)    | 0.00086(15)     |

|     |            |            |            |             |             |             |
|-----|------------|------------|------------|-------------|-------------|-------------|
| Si1 | 0.0253(4)  | 0.0211(4)  | 0.0221(4)  | -0.0101(4)  | -0.0017(4)  | -0.0004(3)  |
| Si2 | 0.0212(4)  | 0.0229(4)  | 0.0192(4)  | -0.0064(4)  | -0.0043(3)  | 0.0017(3)   |
| Si3 | 0.0266(5)  | 0.0281(5)  | 0.0232(4)  | -0.0122(4)  | 0.0014(4)   | 0.0046(4)   |
| Si4 | 0.0194(4)  | 0.0199(4)  | 0.0197(4)  | -0.0063(3)  | -0.0033(3)  | 0.0035(3)   |
| N1  | 0.0382(17) | 0.0337(16) | 0.0240(15) | -0.0085(13) | -0.0087(13) | 0.0021(12)  |
| N2  | 0.0288(14) | 0.0255(14) | 0.0268(14) | -0.0138(12) | -0.0046(12) | -0.0014(11) |
| N3  | 0.0415(19) | 0.0331(18) | 0.074(3)   | -0.0210(16) | 0.0125(17)  | -0.0014(17) |
| N4  | 0.0198(13) | 0.0210(13) | 0.0241(13) | -0.0078(11) | -0.0044(11) | 0.0022(10)  |
| N5  | 0.0288(15) | 0.0280(15) | 0.0342(16) | -0.0098(13) | -0.0106(12) | -0.0018(12) |
| N6  | 0.0199(13) | 0.0295(14) | 0.0179(12) | -0.0081(11) | -0.0003(10) | 0.0034(10)  |
| N7  | 0.0355(17) | 0.0332(16) | 0.0315(16) | 0.0020(14)  | 0.0037(14)  | 0.0003(13)  |
| C1  | 0.0272(16) | 0.0222(15) | 0.0209(15) | -0.0081(13) | -0.0038(13) | 0.0012(12)  |
| C2  | 0.0284(17) | 0.0274(17) | 0.0261(17) | -0.0095(14) | -0.0005(14) | -0.0014(13) |
| C3  | 0.043(2)   | 0.0342(19) | 0.038(2)   | -0.0202(17) | -0.0011(17) | 0.0097(16)  |
| C4  | 0.040(2)   | 0.046(2)   | 0.0286(19) | -0.0137(18) | -0.0000(16) | 0.0175(16)  |
| C5  | 0.041(2)   | 0.039(2)   | 0.0220(17) | -0.0054(17) | -0.0017(15) | 0.0023(14)  |
| C6  | 0.040(2)   | 0.0305(18) | 0.0232(17) | -0.0120(16) | -0.0053(15) | -0.0005(13) |
| C7  | 0.0300(17) | 0.0257(16) | 0.0245(16) | -0.0144(14) | -0.0072(13) | -0.0001(13) |
| C8  | 0.0304(18) | 0.0267(17) | 0.0258(16) | -0.0116(14) | -0.0067(14) | -0.0009(13) |
| C9  | 0.0324(19) | 0.0258(17) | 0.038(2)   | -0.0080(15) | -0.0092(16) | -0.0044(14) |
| C10 | 0.040(2)   | 0.0219(17) | 0.047(2)   | -0.0115(16) | -0.0189(17) | 0.0016(15)  |
| C11 | 0.050(2)   | 0.0306(18) | 0.040(2)   | -0.0265(18) | -0.0141(18) | 0.0104(15)  |
| C12 | 0.040(2)   | 0.0285(17) | 0.0328(19) | -0.0187(16) | -0.0056(16) | 0.0012(14)  |
| C13 | 0.0228(16) | 0.0223(15) | 0.0213(15) | -0.0060(13) | -0.0094(12) | 0.0054(12)  |
| C14 | 0.0319(18) | 0.0259(16) | 0.0267(17) | -0.0131(14) | -0.0072(14) | 0.0029(13)  |
| C15 | 0.038(2)   | 0.0369(19) | 0.0270(18) | -0.0159(17) | -0.0047(15) | 0.0094(14)  |
| C16 | 0.047(2)   | 0.0352(19) | 0.040(2)   | -0.0281(18) | -0.0164(17) | 0.0136(16)  |
| C17 | 0.047(2)   | 0.037(2)   | 0.037(2)   | -0.0263(18) | -0.0116(17) | -0.0004(16) |
| C18 | 0.0360(19) | 0.0366(19) | 0.0267(17) | -0.0174(16) | -0.0049(15) | -0.0015(14) |
| C19 | 0.0263(17) | 0.0279(17) | 0.0240(16) | -0.0042(14) | -0.0070(13) | -0.0038(13) |
| C20 | 0.0312(19) | 0.0302(18) | 0.044(2)   | -0.0084(15) | -0.0157(16) | 0.0011(16)  |
| C21 | 0.051(3)   | 0.0216(18) | 0.076(3)   | -0.0020(18) | -0.035(2)   | 0.0017(19)  |
| C22 | 0.034(2)   | 0.034(2)   | 0.105(4)   | 0.0011(18)  | -0.039(2)   | -0.008(2)   |
| C23 | 0.027(2)   | 0.046(2)   | 0.091(4)   | -0.0100(19) | -0.022(2)   | -0.004(2)   |
| C24 | 0.0287(19) | 0.0302(19) | 0.053(2)   | -0.0059(16) | -0.0123(17) | -0.0022(17) |
| C25 | 0.0362(19) | 0.0307(18) | 0.0319(18) | -0.0177(16) | -0.0021(15) | 0.0119(14)  |
| C26 | 0.036(2)   | 0.0329(19) | 0.041(2)   | -0.0174(17) | -0.0103(16) | 0.0096(16)  |
| C27 | 0.044(2)   | 0.0291(19) | 0.062(3)   | -0.0167(18) | -0.012(2)   | 0.0132(18)  |
| C28 | 0.065(3)   | 0.035(2)   | 0.066(3)   | -0.027(2)   | -0.027(2)   | 0.029(2)    |

|     |            |            |            |             |             |             |
|-----|------------|------------|------------|-------------|-------------|-------------|
| C29 | 0.074(3)   | 0.049(3)   | 0.044(2)   | -0.031(2)   | -0.013(2)   | 0.025(2)    |
| C30 | 0.054(2)   | 0.038(2)   | 0.038(2)   | -0.0190(19) | -0.0021(19) | 0.0142(17)  |
| C31 | 0.0314(18) | 0.0378(19) | 0.0230(16) | -0.0192(16) | 0.0033(14)  | -0.0020(14) |
| C32 | 0.035(2)   | 0.041(2)   | 0.047(2)   | -0.0164(18) | 0.0094(18)  | 0.0067(18)  |
| C33 | 0.039(2)   | 0.050(2)   | 0.054(3)   | -0.022(2)   | 0.0176(19)  | 0.001(2)    |
| C34 | 0.0279(19) | 0.062(3)   | 0.038(2)   | -0.0247(19) | 0.0064(16)  | -0.0136(19) |
| C35 | 0.031(2)   | 0.056(2)   | 0.040(2)   | -0.0185(19) | -0.0114(17) | 0.0022(18)  |
| C36 | 0.0289(18) | 0.053(2)   | 0.0268(18) | -0.0212(17) | -0.0059(14) | 0.0069(16)  |
| C37 | 0.0197(15) | 0.0235(15) | 0.0245(16) | -0.0075(13) | 0.0011(12)  | 0.0011(12)  |
| C38 | 0.0257(17) | 0.0344(18) | 0.0264(17) | -0.0104(15) | -0.0047(14) | 0.0021(14)  |
| C39 | 0.0232(17) | 0.046(2)   | 0.044(2)   | -0.0181(16) | 0.0017(16)  | -0.0053(17) |
| C40 | 0.036(2)   | 0.048(2)   | 0.047(2)   | -0.0251(19) | 0.0054(18)  | 0.0059(18)  |
| C41 | 0.043(2)   | 0.046(2)   | 0.038(2)   | -0.0237(19) | -0.0032(17) | 0.0166(17)  |
| C42 | 0.0298(18) | 0.0362(19) | 0.0295(18) | -0.0148(16) | -0.0058(14) | 0.0092(14)  |
| C43 | 0.0221(16) | 0.0296(17) | 0.0233(16) | -0.0091(14) | -0.0039(13) | 0.0054(13)  |
| C44 | 0.038(2)   | 0.039(2)   | 0.0258(17) | -0.0202(17) | -0.0098(15) | 0.0126(14)  |
| C45 | 0.054(3)   | 0.070(3)   | 0.032(2)   | -0.035(2)   | -0.0197(19) | 0.0133(19)  |
| C46 | 0.074(3)   | 0.074(3)   | 0.035(2)   | -0.042(3)   | -0.026(2)   | 0.031(2)    |
| C47 | 0.065(3)   | 0.054(3)   | 0.042(2)   | -0.035(2)   | -0.021(2)   | 0.0308(19)  |
| C48 | 0.042(2)   | 0.0353(19) | 0.0301(18) | -0.0209(17) | -0.0098(16) | 0.0131(15)  |
| C49 | 0.0273(17) | 0.0271(17) | 0.0236(16) | -0.0091(14) | -0.0052(13) | -0.0014(13) |
| C50 | 0.054(2)   | 0.036(2)   | 0.0258(18) | -0.0153(18) | -0.0168(17) | 0.0112(15)  |
| C51 | 0.059(3)   | 0.057(3)   | 0.051(3)   | -0.013(2)   | -0.027(2)   | 0.022(2)    |
| C52 | 0.097(4)   | 0.100(4)   | 0.049(3)   | -0.068(4)   | -0.036(3)   | 0.040(3)    |
| C53 | 0.115(4)   | 0.049(3)   | 0.030(2)   | -0.009(3)   | -0.024(3)   | 0.0011(19)  |
| C54 | 0.0307(19) | 0.040(2)   | 0.043(2)   | -0.0179(17) | -0.0091(16) | -0.0052(16) |
| C55 | 0.031(2)   | 0.056(3)   | 0.059(3)   | -0.0202(19) | -0.0149(19) | -0.005(2)   |
| C56 | 0.050(3)   | 0.043(2)   | 0.078(3)   | -0.025(2)   | -0.018(2)   | -0.011(2)   |
| C57 | 0.066(3)   | 0.086(3)   | 0.041(2)   | -0.048(3)   | -0.028(2)   | 0.004(2)    |
| C58 | 0.0327(19) | 0.0308(18) | 0.043(2)   | -0.0152(16) | 0.0038(16)  | -0.0010(16) |
| C59 | 0.032(2)   | 0.032(2)   | 0.111(4)   | -0.0191(18) | -0.006(2)   | 0.021(2)    |
| C66 | 0.0221(15) | 0.0181(14) | 0.0226(15) | -0.0084(12) | 0.0005(12)  | -0.0003(11) |
| C67 | 0.0229(15) | 0.0180(14) | 0.0193(14) | -0.0076(12) | 0.0025(12)  | 0.0021(11)  |
| C68 | 0.0192(16) | 0.0256(16) | 0.0331(18) | -0.0032(13) | -0.0040(14) | -0.0037(13) |
| C69 | 0.0302(18) | 0.0221(17) | 0.052(2)   | -0.0070(15) | -0.0089(17) | 0.0024(15)  |
| C70 | 0.0297(19) | 0.039(2)   | 0.0333(19) | -0.0079(16) | 0.0030(15)  | -0.0089(15) |
| C71 | 0.0244(18) | 0.0316(19) | 0.050(2)   | -0.0037(15) | -0.0075(16) | -0.0028(16) |
| C72 | 0.0217(16) | 0.0311(18) | 0.0213(16) | -0.0044(14) | -0.0030(13) | 0.0013(13)  |
| C73 | 0.038(2)   | 0.0330(19) | 0.044(2)   | -0.0163(17) | -0.0163(17) | -0.0012(16) |

|     |            |            |            |             |             |             |
|-----|------------|------------|------------|-------------|-------------|-------------|
| C74 | 0.076(3)   | 0.067(3)   | 0.065(3)   | -0.039(3)   | -0.040(3)   | 0.005(2)    |
| C75 | 0.049(2)   | 0.031(2)   | 0.068(3)   | -0.0126(19) | -0.013(2)   | -0.0089(19) |
| C76 | 0.052(3)   | 0.046(2)   | 0.071(3)   | -0.028(2)   | -0.005(2)   | 0.001(2)    |
| C77 | 0.0227(15) | 0.0239(15) | 0.0167(14) | -0.0072(13) | -0.0005(12) | 0.0043(12)  |
| C78 | 0.0349(19) | 0.045(2)   | 0.0168(15) | -0.0159(17) | -0.0014(14) | 0.0002(14)  |
| C79 | 0.045(2)   | 0.053(2)   | 0.031(2)   | -0.022(2)   | 0.0028(17)  | -0.0115(17) |
| C80 | 0.039(2)   | 0.069(3)   | 0.0182(17) | -0.023(2)   | -0.0079(15) | 0.0095(17)  |
| C81 | 0.0318(19) | 0.057(2)   | 0.0237(18) | -0.0153(18) | 0.0022(15)  | -0.0003(16) |
| C82 | 0.0326(19) | 0.0308(18) | 0.0246(17) | -0.0056(16) | -0.0031(14) | 0.0004(14)  |
| C83 | 0.039(2)   | 0.038(2)   | 0.046(2)   | 0.0101(18)  | 0.0122(19)  | 0.0025(18)  |

The general temperature factor expression:  $\exp(-2\pi^2(a^2U_{11}h^2 + b^2U_{22}k^2 + c^2U_{33}l^2 + 2a*b*U_{12}hk + 2a*c*U_{13}hl + 2b*c*U_{23}kl))$

**Table S7-4.** Bond lengths (Å)

| atom | atom | distance   | atom | atom | distance   |
|------|------|------------|------|------|------------|
| Ni1  | Ni2  | 2.5288(7)  | Ni1  | Ni3  | 2.5447(7)  |
| Ni1  | Si1  | 2.6549(8)  | Ni1  | Si2  | 2.2434(10) |
| Ni1  | N2   | 2.012(3)   | Ni1  | C49  | 1.755(3)   |
| Ni1  | C66  | 2.366(3)   | Ni2  | Ni3  | 2.5629(7)  |
| Ni2  | Si1  | 2.6982(10) | Ni2  | Si3  | 2.2841(11) |
| Ni2  | N2   | 1.990(3)   | Ni2  | C58  | 1.767(5)   |
| Ni2  | C66  | 2.119(4)   | Ni3  | Ni4  | 2.4564(8)  |
| Ni3  | Ni5  | 2.4826(5)  | Ni3  | Si2  | 2.6082(8)  |
| Ni3  | Si3  | 2.4875(12) | Ni3  | C66  | 2.038(3)   |
| Ni3  | C67  | 1.887(2)   | Ni3  | C77  | 1.923(3)   |
| Ni4  | Ni5  | 2.6564(6)  | Ni4  | Si4  | 2.1871(8)  |
| Ni4  | N6   | 1.911(3)   | Ni4  | C72  | 1.793(4)   |
| Ni4  | C77  | 2.025(4)   | Ni5  | Si2  | 2.2507(9)  |
| Ni5  | N6   | 1.919(3)   | Ni5  | C77  | 1.994(3)   |
| Ni5  | C82  | 1.792(3)   | Si1  | N2   | 1.715(3)   |
| Si1  | C1   | 1.890(3)   | Si1  | C7   | 1.890(3)   |
| Si1  | C66  | 1.847(3)   | Si2  | C13  | 1.900(4)   |
| Si2  | C19  | 1.918(3)   | Si3  | C25  | 1.891(3)   |
| Si3  | C31  | 1.900(3)   | Si3  | C77  | 1.899(4)   |
| Si4  | N4   | 1.779(3)   | Si4  | C37  | 1.879(4)   |
| Si4  | C43  | 1.887(3)   | N1   | C49  | 1.160(4)   |
| N1   | C50  | 1.451(5)   | N2   | C54  | 1.481(6)   |
| N3   | C58  | 1.158(6)   | N3   | C59  | 1.454(7)   |
| N4   | C67  | 1.340(4)   | N4   | C68  | 1.506(3)   |



|     |     |           |     |     |           |
|-----|-----|-----------|-----|-----|-----------|
| N5  | C72 | 1.152(6)  | N5  | C73 | 1.452(6)  |
| N6  | C77 | 1.341(4)  | N6  | C78 | 1.481(4)  |
| N7  | C82 | 1.152(4)  | N7  | C83 | 1.443(4)  |
| C1  | C2  | 1.381(6)  | C1  | C6  | 1.404(5)  |
| C2  | C3  | 1.394(5)  | C3  | C4  | 1.380(5)  |
| C4  | C5  | 1.365(7)  | C5  | C6  | 1.378(5)  |
| C7  | C8  | 1.392(4)  | C7  | C12 | 1.403(5)  |
| C8  | C9  | 1.395(4)  | C9  | C10 | 1.379(6)  |
| C10 | C11 | 1.380(4)  | C11 | C12 | 1.372(5)  |
| C13 | C14 | 1.387(4)  | C13 | C18 | 1.396(5)  |
| C14 | C15 | 1.396(6)  | C15 | C16 | 1.367(6)  |
| C16 | C17 | 1.365(5)  | C17 | C18 | 1.378(7)  |
| C19 | C20 | 1.391(5)  | C19 | C24 | 1.388(6)  |
| C20 | C21 | 1.391(5)  | C21 | C22 | 1.372(8)  |
| C22 | C23 | 1.378(7)  | C23 | C24 | 1.388(5)  |
| C25 | C26 | 1.390(4)  | C25 | C30 | 1.392(5)  |
| C26 | C27 | 1.390(5)  | C27 | C28 | 1.370(6)  |
| C28 | C29 | 1.381(5)  | C29 | C30 | 1.380(6)  |
| C31 | C32 | 1.389(6)  | C31 | C36 | 1.379(5)  |
| C32 | C33 | 1.385(6)  | C33 | C34 | 1.378(5)  |
| C34 | C35 | 1.362(7)  | C35 | C36 | 1.393(5)  |
| C37 | C38 | 1.397(5)  | C37 | C42 | 1.391(5)  |
| C38 | C39 | 1.388(6)  | C39 | C40 | 1.377(6)  |
| C40 | C41 | 1.368(7)  | C41 | C42 | 1.383(6)  |
| C43 | C44 | 1.396(6)  | C43 | C48 | 1.393(6)  |
| C44 | C45 | 1.390(5)  | C45 | C46 | 1.372(8)  |
| C46 | C47 | 1.384(8)  | C47 | C48 | 1.393(5)  |
| C50 | C51 | 1.527(6)  | C50 | C52 | 1.499(9)  |
| C50 | C53 | 1.504(6)  | C54 | C55 | 1.522(4)  |
| C54 | C56 | 1.512(6)  | C54 | C57 | 1.522(6)  |
| C59 | C60 | 1.669(10) | C59 | C61 | 1.579(9)  |
| C59 | C62 | 1.395(10) | C59 | C63 | 1.767(13) |
| C59 | C64 | 1.402(16) | C59 | C65 | 1.445(10) |
| C60 | C64 | 1.319(17) | C61 | C65 | 0.563(15) |
| C62 | C63 | 0.923(14) | C62 | C64 | 1.48(2)   |
| C66 | C67 | 1.304(5)  | C68 | C69 | 1.530(6)  |
| C68 | C70 | 1.519(5)  | C68 | C71 | 1.521(6)  |
| C73 | C74 | 1.511(7)  | C73 | C75 | 1.516(4)  |
| C73 | C76 | 1.522(6)  | C78 | C79 | 1.525(6)  |

|     |     |           |     |     |           |
|-----|-----|-----------|-----|-----|-----------|
| C78 | C80 | 1.510(5)  | C78 | C81 | 1.508(6)  |
| C83 | C84 | 1.674(11) | C83 | C85 | 1.414(15) |
| C83 | C86 | 1.508(12) | C83 | C87 | 1.704(16) |
| C83 | C88 | 1.510(14) | C83 | C89 | 1.506(14) |
| C84 | C89 | 1.14(2)   | C85 | C87 | 0.909(18) |
| C85 | C89 | 1.63(2)   | C86 | C88 | 0.550(19) |

**Table S7-5.** Bond angles ( $^{\circ}$ )

| atom | atom | atom | angle      | atom | atom | atom | angle      |
|------|------|------|------------|------|------|------|------------|
| Ni2  | Ni1  | Ni3  | 60.68(2)   | Ni2  | Ni1  | Si1  | 62.68(2)   |
| Ni2  | Ni1  | Si2  | 114.84(3)  | Ni2  | Ni1  | N2   | 50.43(8)   |
| Ni2  | Ni1  | C49  | 155.55(14) | Ni2  | Ni1  | C66  | 51.18(9)   |
| Ni3  | Ni1  | Si1  | 91.32(3)   | Ni3  | Ni1  | Si2  | 65.66(3)   |
| Ni3  | Ni1  | N2   | 107.36(8)  | Ni3  | Ni1  | C49  | 143.50(14) |
| Ni3  | Ni1  | C66  | 48.87(7)   | Si1  | Ni1  | Si2  | 150.62(4)  |
| Si1  | Ni1  | N2   | 40.25(8)   | Si1  | Ni1  | C49  | 110.16(9)  |
| Si1  | Ni1  | C66  | 42.69(8)   | Si2  | Ni1  | N2   | 161.21(8)  |
| Si2  | Ni1  | C49  | 83.07(12)  | Si2  | Ni1  | C66  | 110.89(9)  |
| N2   | Ni1  | C49  | 108.01(15) | N2   | Ni1  | C66  | 70.53(12)  |
| C49  | Ni1  | C66  | 140.39(12) | Ni1  | Ni2  | Ni3  | 59.96(2)   |
| Ni1  | Ni2  | Si1  | 60.95(2)   | Ni1  | Ni2  | Si3  | 112.74(3)  |
| Ni1  | Ni2  | N2   | 51.19(9)   | Ni1  | Ni2  | C58  | 142.18(12) |
| Ni1  | Ni2  | C66  | 60.44(8)   | Ni3  | Ni2  | Si1  | 89.94(3)   |
| Ni3  | Ni2  | Si3  | 61.44(3)   | Ni3  | Ni2  | N2   | 107.38(10) |
| Ni3  | Ni2  | C58  | 143.73(13) | Ni3  | Ni2  | C66  | 50.52(8)   |
| Si1  | Ni2  | Si3  | 144.85(4)  | Si1  | Ni2  | N2   | 39.41(8)   |
| Si1  | Ni2  | C58  | 124.93(12) | Si1  | Ni2  | C66  | 43.03(9)   |
| Si3  | Ni2  | N2   | 162.56(8)  | Si3  | Ni2  | C58  | 82.48(14)  |
| Si3  | Ni2  | C66  | 102.34(9)  | N2   | Ni2  | C58  | 106.62(17) |
| N2   | Ni2  | C66  | 76.42(13)  | C58  | Ni2  | C66  | 153.15(12) |
| Ni1  | Ni3  | Ni2  | 59.353(19) | Ni1  | Ni3  | Ni4  | 147.67(2)  |
| Ni1  | Ni3  | Ni5  | 97.195(19) | Ni1  | Ni3  | Si2  | 51.60(2)   |
| Ni1  | Ni3  | Si3  | 105.65(3)  | Ni1  | Ni3  | C66  | 60.99(9)   |
| Ni1  | Ni3  | C67  | 95.24(10)  | Ni1  | Ni3  | C77  | 136.70(10) |
| Ni2  | Ni3  | Ni4  | 151.57(3)  | Ni2  | Ni3  | Ni5  | 114.04(2)  |
| Ni2  | Ni3  | Si2  | 102.19(3)  | Ni2  | Ni3  | Si3  | 53.75(3)   |
| Ni2  | Ni3  | C66  | 53.38(11)  | Ni2  | Ni3  | C67  | 84.79(12)  |
| Ni2  | Ni3  | C77  | 102.17(12) | Ni4  | Ni3  | Ni5  | 65.069(18) |
| Ni4  | Ni3  | Si2  | 98.47(3)   | Ni4  | Ni3  | Si3  | 99.19(3)   |

|     |     |     |            |     |     |     |            |
|-----|-----|-----|------------|-----|-----|-----|------------|
| Ni4 | Ni3 | C66 | 135.49(10) | Ni4 | Ni3 | C67 | 97.03(11)  |
| Ni4 | Ni3 | C77 | 53.42(12)  | Ni5 | Ni3 | Si2 | 52.41(2)   |
| Ni5 | Ni3 | Si3 | 83.60(2)   | Ni5 | Ni3 | C66 | 157.87(9)  |
| Ni5 | Ni3 | C67 | 160.91(12) | Ni5 | Ni3 | C77 | 51.96(8)   |
| Si2 | Ni3 | Si3 | 117.63(3)  | Si2 | Ni3 | C66 | 108.99(9)  |
| Si2 | Ni3 | C67 | 129.34(9)  | Si2 | Ni3 | C77 | 104.15(8)  |
| Si3 | Ni3 | C66 | 98.15(10)  | Si3 | Ni3 | C67 | 106.88(10) |
| Si3 | Ni3 | C77 | 48.98(12)  | C66 | Ni3 | C67 | 38.57(15)  |
| C66 | Ni3 | C77 | 142.06(13) | C67 | Ni3 | C77 | 123.55(12) |
| Ni3 | Ni4 | Ni5 | 57.942(17) | Ni3 | Ni4 | Si4 | 85.14(3)   |
| Ni3 | Ni4 | N6  | 85.12(9)   | Ni3 | Ni4 | C72 | 149.98(11) |
| Ni3 | Ni4 | C77 | 49.68(8)   | Ni5 | Ni4 | Si4 | 141.04(3)  |
| Ni5 | Ni4 | N6  | 46.20(8)   | Ni5 | Ni4 | C72 | 116.23(9)  |
| Ni5 | Ni4 | C77 | 48.14(8)   | Si4 | Ni4 | N6  | 151.40(9)  |
| Si4 | Ni4 | C72 | 88.91(9)   | Si4 | Ni4 | C77 | 117.70(8)  |
| N6  | Ni4 | C72 | 112.20(13) | N6  | Ni4 | C77 | 39.71(12)  |
| C72 | Ni4 | C77 | 151.89(11) | Ni3 | Ni5 | Ni4 | 56.988(17) |
| Ni3 | Ni5 | Si2 | 66.67(2)   | Ni3 | Ni5 | N6  | 84.24(6)   |
| Ni3 | Ni5 | C77 | 49.41(8)   | Ni3 | Ni5 | C82 | 163.74(12) |
| Ni4 | Ni5 | Si2 | 102.56(3)  | Ni4 | Ni5 | N6  | 45.98(8)   |
| Ni4 | Ni5 | C77 | 49.14(11)  | Ni4 | Ni5 | C82 | 133.93(15) |
| Si2 | Ni5 | N6  | 147.03(7)  | Si2 | Ni5 | C77 | 115.82(8)  |
| Si2 | Ni5 | C82 | 97.42(11)  | N6  | Ni5 | C77 | 40.03(12)  |
| N6  | Ni5 | C82 | 111.99(13) | C77 | Ni5 | C82 | 145.71(14) |
| Ni1 | Si1 | Ni2 | 56.37(2)   | Ni1 | Si1 | N2  | 49.27(10)  |
| Ni1 | Si1 | C1  | 93.03(9)   | Ni1 | Si1 | C7  | 159.77(11) |
| Ni1 | Si1 | C66 | 60.28(8)   | Ni2 | Si1 | N2  | 47.43(10)  |
| Ni2 | Si1 | C1  | 148.95(9)  | Ni2 | Si1 | C7  | 103.64(10) |
| Ni2 | Si1 | C66 | 51.53(11)  | N2  | Si1 | C1  | 118.39(14) |
| N2  | Si1 | C7  | 116.41(17) | N2  | Si1 | C66 | 91.06(14)  |
| C1  | Si1 | C7  | 107.14(13) | C1  | Si1 | C66 | 111.46(17) |
| C7  | Si1 | C66 | 111.58(15) | Ni1 | Si2 | Ni3 | 62.74(2)   |
| Ni1 | Si2 | Ni5 | 114.10(4)  | Ni1 | Si2 | C13 | 115.80(8)  |
| Ni1 | Si2 | C19 | 108.10(12) | Ni3 | Si2 | Ni5 | 60.93(2)   |
| Ni3 | Si2 | C13 | 104.15(9)  | Ni3 | Si2 | C19 | 152.69(13) |
| Ni5 | Si2 | C13 | 108.62(11) | Ni5 | Si2 | C19 | 106.33(9)  |
| C13 | Si2 | C19 | 102.89(15) | Ni2 | Si3 | Ni3 | 64.81(3)   |
| Ni2 | Si3 | C25 | 110.44(11) | Ni2 | Si3 | C31 | 106.94(12) |
| Ni2 | Si3 | C77 | 113.94(10) | Ni3 | Si3 | C25 | 122.48(13) |

|     |     |     |            |     |     |     |            |
|-----|-----|-----|------------|-----|-----|-----|------------|
| Ni3 | Si3 | C31 | 127.40(12) | Ni3 | Si3 | C77 | 49.81(9)   |
| C25 | Si3 | C31 | 109.27(16) | C25 | Si3 | C77 | 111.04(18) |
| C31 | Si3 | C77 | 104.90(15) | Ni4 | Si4 | N4  | 116.53(10) |
| Ni4 | Si4 | C37 | 119.63(9)  | Ni4 | Si4 | C43 | 94.29(8)   |
| N4  | Si4 | C37 | 106.37(14) | N4  | Si4 | C43 | 106.66(14) |
| C37 | Si4 | C43 | 112.29(17) | C49 | N1  | C50 | 179.3(3)   |
| Ni1 | N2  | Ni2 | 78.38(11)  | Ni1 | N2  | Si1 | 90.48(16)  |
| Ni1 | N2  | C54 | 123.8(2)   | Ni2 | N2  | Si1 | 93.16(14)  |
| Ni2 | N2  | C54 | 126.9(2)   | Si1 | N2  | C54 | 129.2(2)   |
| C58 | N3  | C59 | 175.6(5)   | Si4 | N4  | C67 | 107.58(17) |
| Si4 | N4  | C68 | 131.7(3)   | C67 | N4  | C68 | 120.1(3)   |
| C72 | N5  | C73 | 173.6(3)   | Ni4 | N6  | Ni5 | 87.82(10)  |
| Ni4 | N6  | C77 | 74.72(18)  | Ni4 | N6  | C78 | 129.5(3)   |
| Ni5 | N6  | C77 | 73.02(17)  | Ni5 | N6  | C78 | 136.15(18) |
| C77 | N6  | C78 | 132.0(3)   | C82 | N7  | C83 | 172.0(4)   |
| Si1 | C1  | C2  | 118.6(2)   | Si1 | C1  | C6  | 124.3(3)   |
| C2  | C1  | C6  | 117.1(3)   | C1  | C2  | C3  | 121.5(3)   |
| C2  | C3  | C4  | 119.5(4)   | C3  | C4  | C5  | 120.3(4)   |
| C4  | C5  | C6  | 120.0(4)   | C1  | C6  | C5  | 121.6(4)   |
| Si1 | C7  | C8  | 123.2(3)   | Si1 | C7  | C12 | 119.8(2)   |
| C8  | C7  | C12 | 116.7(3)   | C7  | C8  | C9  | 121.5(3)   |
| C8  | C9  | C10 | 120.0(3)   | C9  | C10 | C11 | 119.6(3)   |
| C10 | C11 | C12 | 120.2(4)   | C7  | C12 | C11 | 122.0(3)   |
| Si2 | C13 | C14 | 121.5(3)   | Si2 | C13 | C18 | 122.0(2)   |
| C14 | C13 | C18 | 116.4(4)   | C13 | C14 | C15 | 122.0(3)   |
| C14 | C15 | C16 | 119.5(3)   | C15 | C16 | C17 | 119.8(4)   |
| C16 | C17 | C18 | 120.8(4)   | C13 | C18 | C17 | 121.5(3)   |
| Si2 | C19 | C20 | 122.9(3)   | Si2 | C19 | C24 | 120.2(3)   |
| C20 | C19 | C24 | 116.9(3)   | C19 | C20 | C21 | 121.3(4)   |
| C20 | C21 | C22 | 120.6(4)   | C21 | C22 | C23 | 119.4(4)   |
| C22 | C23 | C24 | 119.8(5)   | C19 | C24 | C23 | 122.1(4)   |
| Si3 | C25 | C26 | 119.7(3)   | Si3 | C25 | C30 | 124.1(2)   |
| C26 | C25 | C30 | 116.1(3)   | C25 | C26 | C27 | 122.1(3)   |
| C26 | C27 | C28 | 119.7(3)   | C27 | C28 | C29 | 120.1(4)   |
| C28 | C29 | C30 | 119.2(4)   | C25 | C30 | C29 | 122.7(3)   |
| Si3 | C31 | C32 | 124.0(2)   | Si3 | C31 | C36 | 118.5(3)   |
| C32 | C31 | C36 | 117.4(3)   | C31 | C32 | C33 | 121.3(3)   |
| C32 | C33 | C34 | 120.0(4)   | C33 | C34 | C35 | 119.8(4)   |
| C34 | C35 | C36 | 120.0(3)   | C31 | C36 | C35 | 121.5(4)   |

|     |     |     |            |     |     |     |           |
|-----|-----|-----|------------|-----|-----|-----|-----------|
| Si4 | C37 | C38 | 126.1(3)   | Si4 | C37 | C42 | 117.5(3)  |
| C38 | C37 | C42 | 116.4(3)   | C37 | C38 | C39 | 121.9(3)  |
| C38 | C39 | C40 | 119.6(4)   | C39 | C40 | C41 | 120.0(4)  |
| C40 | C41 | C42 | 120.1(4)   | C37 | C42 | C41 | 122.0(4)  |
| Si4 | C43 | C44 | 123.4(3)   | Si4 | C43 | C48 | 119.1(3)  |
| C44 | C43 | C48 | 116.9(3)   | C43 | C44 | C45 | 121.3(4)  |
| C44 | C45 | C46 | 120.8(5)   | C45 | C46 | C47 | 119.4(4)  |
| C46 | C47 | C48 | 119.7(5)   | C43 | C48 | C47 | 121.9(4)  |
| Ni1 | C49 | N1  | 175.8(3)   | N1  | C50 | C51 | 106.0(3)  |
| N1  | C50 | C52 | 108.0(4)   | N1  | C50 | C53 | 108.2(3)  |
| C51 | C50 | C52 | 111.8(4)   | C51 | C50 | C53 | 110.7(4)  |
| C52 | C50 | C53 | 111.8(4)   | N2  | C54 | C55 | 108.3(3)  |
| N2  | C54 | C56 | 110.9(3)   | N2  | C54 | C57 | 110.8(4)  |
| C55 | C54 | C56 | 109.4(4)   | C55 | C54 | C57 | 110.0(3)  |
| C56 | C54 | C57 | 107.5(4)   | Ni2 | C58 | N3  | 176.8(3)  |
| N3  | C59 | C60 | 106.0(5)   | N3  | C59 | C61 | 101.9(5)  |
| N3  | C59 | C62 | 112.5(5)   | N3  | C59 | C63 | 105.3(5)  |
| N3  | C59 | C64 | 104.0(10)  | N3  | C59 | C65 | 115.1(6)  |
| C60 | C59 | C61 | 108.4(5)   | C60 | C59 | C62 | 108.9(5)  |
| C60 | C59 | C63 | 137.7(5)   | C60 | C59 | C64 | 50.0(7)   |
| C60 | C59 | C65 | 88.7(6)    | C61 | C59 | C62 | 118.3(7)  |
| C61 | C59 | C63 | 92.1(6)    | C61 | C59 | C64 | 150.2(10) |
| C61 | C59 | C65 | 20.9(6)    | C62 | C59 | C63 | 31.2(5)   |
| C62 | C59 | C64 | 63.8(9)    | C62 | C59 | C65 | 121.4(8)  |
| C63 | C59 | C64 | 95.0(9)    | C63 | C59 | C65 | 102.9(7)  |
| C64 | C59 | C65 | 130.0(10)  | C59 | C60 | C64 | 54.4(8)   |
| C59 | C61 | C65 | 66.0(13)   | C59 | C62 | C63 | 97.2(9)   |
| C59 | C62 | C64 | 58.3(8)    | C63 | C62 | C64 | 155.4(13) |
| C59 | C63 | C62 | 51.6(8)    | C59 | C64 | C60 | 75.6(8)   |
| C59 | C64 | C62 | 57.9(8)    | C60 | C64 | C62 | 126.4(13) |
| C59 | C65 | C61 | 93.1(14)   | Ni1 | C66 | Ni2 | 68.38(9)  |
| Ni1 | C66 | Ni3 | 70.14(8)   | Ni1 | C66 | Si1 | 77.03(11) |
| Ni1 | C66 | C67 | 125.9(2)   | Ni2 | C66 | Ni3 | 76.10(9)  |
| Ni2 | C66 | Si1 | 85.44(16)  | Ni2 | C66 | C67 | 123.6(2)  |
| Ni3 | C66 | Si1 | 146.39(17) | Ni3 | C66 | C67 | 64.46(16) |
| Si1 | C66 | C67 | 146.7(2)   | Ni3 | C67 | N4  | 130.8(2)  |
| Ni3 | C67 | C66 | 76.98(17)  | N4  | C67 | C66 | 152.2(2)  |
| N4  | C68 | C69 | 108.7(3)   | N4  | C68 | C70 | 109.6(2)  |
| N4  | C68 | C71 | 109.0(3)   | C69 | C68 | C70 | 111.0(3)  |

|     |     |     |            |     |     |     |           |
|-----|-----|-----|------------|-----|-----|-----|-----------|
| C69 | C68 | C71 | 108.9(3)   | C70 | C68 | C71 | 109.6(3)  |
| Ni4 | C72 | N5  | 176.2(3)   | N5  | C73 | C74 | 108.8(4)  |
| N5  | C73 | C75 | 106.5(4)   | N5  | C73 | C76 | 107.5(3)  |
| C74 | C73 | C75 | 110.9(3)   | C74 | C73 | C76 | 111.1(4)  |
| C75 | C73 | C76 | 111.8(3)   | Ni3 | C77 | Ni4 | 76.90(12) |
| Ni3 | C77 | Ni5 | 78.63(11)  | Ni3 | C77 | Si3 | 81.20(13) |
| Ni3 | C77 | N6  | 131.1(3)   | Ni4 | C77 | Ni5 | 82.73(14) |
| Ni4 | C77 | Si3 | 147.18(14) | Ni4 | C77 | N6  | 65.6(2)   |
| Ni5 | C77 | Si3 | 116.58(18) | Ni5 | C77 | N6  | 66.95(16) |
| Si3 | C77 | N6  | 145.0(2)   | N6  | C78 | C79 | 105.7(3)  |
| N6  | C78 | C80 | 108.5(2)   | N6  | C78 | C81 | 110.9(3)  |
| C79 | C78 | C80 | 110.0(4)   | C79 | C78 | C81 | 110.3(3)  |
| C80 | C78 | C81 | 111.3(3)   | Ni5 | C82 | N7  | 171.4(4)  |
| N7  | C83 | C84 | 103.5(4)   | N7  | C83 | C85 | 110.0(5)  |
| N7  | C83 | C86 | 109.2(5)   | N7  | C83 | C87 | 104.3(4)  |
| N7  | C83 | C88 | 109.9(5)   | N7  | C83 | C89 | 109.4(5)  |
| C84 | C83 | C85 | 108.1(7)   | C84 | C83 | C86 | 110.0(6)  |
| C84 | C83 | C87 | 138.3(6)   | C84 | C83 | C88 | 89.9(6)   |
| C84 | C83 | C89 | 41.5(8)    | C85 | C83 | C86 | 115.3(7)  |
| C85 | C83 | C87 | 32.2(7)    | C85 | C83 | C88 | 130.3(7)  |
| C85 | C83 | C89 | 67.6(8)    | C86 | C83 | C87 | 89.3(7)   |
| C86 | C83 | C88 | 21.0(7)    | C86 | C83 | C89 | 136.7(6)  |
| C87 | C83 | C88 | 108.9(7)   | C87 | C83 | C89 | 99.4(8)   |
| C88 | C83 | C89 | 122.9(7)   | C83 | C84 | C89 | 61.3(8)   |
| C83 | C85 | C87 | 91.8(14)   | C83 | C85 | C89 | 58.9(8)   |
| C87 | C85 | C89 | 149.7(18)  | C83 | C86 | C88 | 79.7(17)  |
| C83 | C87 | C85 | 56.0(12)   | C83 | C88 | C86 | 79.3(19)  |
| C83 | C89 | C84 | 77.2(10)   | C83 | C89 | C85 | 53.5(7)   |
| C84 | C89 | C85 | 129.2(12)  |     |     |     |           |

**Table S7-6.** Torsion Angles(°)

(Those having bond angles > 160 or < 20 degrees are excluded.)

| atom1 | atom2 | atom3 | atom4 | angle       | atom1 | atom2 | atom3 | atom4 | angle       |
|-------|-------|-------|-------|-------------|-------|-------|-------|-------|-------------|
| Ni2   | Ni1   | Ni3   | Ni2   | -0.0        | Ni2   | Ni1   | Ni3   | Ni4   | 167.22(3)   |
| Ni2   | Ni1   | Ni3   | Ni5   | 113.731(18) | Ni2   | Ni1   | Ni3   | Si2   | 141.519(17) |
| Ni2   | Ni1   | Ni3   | Si3   | 28.399(13)  | Ni2   | Ni1   | Ni3   | C66   | -62.345(13) |
| Ni2   | Ni1   | Ni3   | C67   | -80.780(19) | Ni2   | Ni1   | Ni3   | C77   | 74.25(3)    |
| Ni3   | Ni1   | Ni2   | Ni3   | 0.0         | Ni3   | Ni1   | Ni2   | Si1   | 108.650(15) |
| Ni3   | Ni1   | Ni2   | Si3   | -32.739(17) | Ni3   | Ni1   | Ni2   | N2    | 155.217(17) |

|     |     |     |     |             |     |     |     |     |             |
|-----|-----|-----|-----|-------------|-----|-----|-----|-----|-------------|
| Ni3 | Ni1 | Ni2 | C58 | -140.71(4)  | Ni3 | Ni1 | Ni2 | C66 | 58.907(14)  |
| Ni2 | Ni1 | Si1 | Ni2 | -0.000(13)  | Ni2 | Ni1 | Si1 | N2  | -60.04(3)   |
| Ni2 | Ni1 | Si1 | C1  | 174.32(5)   | Ni2 | Ni1 | Si1 | C7  | -9.80(16)   |
| Ni2 | Ni1 | Si1 | C66 | 61.27(2)    | Si1 | Ni1 | Ni2 | Ni3 | -108.65(3)  |
| Si1 | Ni1 | Ni2 | Si1 | 0.00(3)     | Si1 | Ni1 | Ni2 | Si3 | -141.39(3)  |
| Si1 | Ni1 | Ni2 | N2  | 46.57(3)    | Si1 | Ni1 | Ni2 | C58 | 110.64(5)   |
| Si1 | Ni1 | Ni2 | C66 | -49.74(3)   | Ni2 | Ni1 | Si2 | Ni3 | -36.72(3)   |
| Ni2 | Ni1 | Si2 | Ni5 | -2.74(5)    | Ni2 | Ni1 | Si2 | C13 | -129.94(3)  |
| Ni2 | Ni1 | Si2 | C19 | 115.31(3)   | Si2 | Ni1 | Ni2 | Ni3 | 38.66(3)    |
| Si2 | Ni1 | Ni2 | Si1 | 147.31(4)   | Si2 | Ni1 | Ni2 | Si3 | 5.93(4)     |
| Si2 | Ni1 | Ni2 | N2  | -166.12(4)  | Si2 | Ni1 | Ni2 | C58 | -102.05(5)  |
| Si2 | Ni1 | Ni2 | C66 | 97.57(4)    | Ni2 | Ni1 | N2  | Ni2 | 0.000(11)   |
| Ni2 | Ni1 | N2  | Si1 | 93.13(12)   | Ni2 | Ni1 | N2  | C54 | -126.8(2)   |
| N2  | Ni1 | Ni2 | Ni3 | -155.22(10) | N2  | Ni1 | Ni2 | Si1 | -46.57(10)  |
| N2  | Ni1 | Ni2 | Si3 | 172.04(10)  | N2  | Ni1 | Ni2 | N2  | 0.00(10)    |
| N2  | Ni1 | Ni2 | C58 | 64.07(10)   | N2  | Ni1 | Ni2 | C66 | -96.31(10)  |
| C49 | Ni1 | Ni2 | Ni3 | 172.8(2)    | C49 | Ni1 | Ni2 | Si1 | -78.5(2)    |
| C49 | Ni1 | Ni2 | Si3 | 140.1(2)    | C49 | Ni1 | Ni2 | N2  | -32.0(2)    |
| C49 | Ni1 | Ni2 | C58 | 32.1(2)     | C49 | Ni1 | Ni2 | C66 | -128.3(2)   |
| Ni2 | Ni1 | C66 | Ni2 | -0.000(14)  | Ni2 | Ni1 | C66 | Ni3 | 82.43(8)    |
| Ni2 | Ni1 | C66 | Si1 | -90.20(13)  | Ni2 | Ni1 | C66 | C67 | 116.7(2)    |
| C66 | Ni1 | Ni2 | Ni3 | -58.91(10)  | C66 | Ni1 | Ni2 | Si1 | 49.74(10)   |
| C66 | Ni1 | Ni2 | Si3 | -91.65(10)  | C66 | Ni1 | Ni2 | N2  | 96.31(10)   |
| C66 | Ni1 | Ni2 | C58 | 160.38(11)  | C66 | Ni1 | Ni2 | C66 | -0.00(10)   |
| Ni3 | Ni1 | Si1 | Ni2 | -55.726(19) | Ni3 | Ni1 | Si1 | N2  | -115.76(3)  |
| Ni3 | Ni1 | Si1 | C1  | 118.60(4)   | Ni3 | Ni1 | Si1 | C7  | -65.52(17)  |
| Ni3 | Ni1 | Si1 | C66 | 5.55(3)     | Si1 | Ni1 | Ni3 | Ni2 | 57.35(2)    |
| Si1 | Ni1 | Ni3 | Ni4 | -135.43(4)  | Si1 | Ni1 | Ni3 | Ni5 | 171.08(3)   |
| Si1 | Ni1 | Ni3 | Si2 | -161.13(3)  | Si1 | Ni1 | Ni3 | Si3 | 85.75(3)    |
| Si1 | Ni1 | Ni3 | C66 | -4.99(3)    | Si1 | Ni1 | Ni3 | C67 | -23.43(3)   |
| Si1 | Ni1 | Ni3 | C77 | 131.60(4)   | Ni3 | Ni1 | Si2 | Ni3 | -0.000(11)  |
| Ni3 | Ni1 | Si2 | Ni5 | 33.98(3)    | Ni3 | Ni1 | Si2 | C13 | -93.22(4)   |
| Ni3 | Ni1 | Si2 | C19 | 152.02(5)   | Si2 | Ni1 | Ni3 | Ni2 | -141.52(3)  |
| Si2 | Ni1 | Ni3 | Ni4 | 25.70(4)    | Si2 | Ni1 | Ni3 | Ni5 | -27.79(3)   |
| Si2 | Ni1 | Ni3 | Si2 | 0.00(3)     | Si2 | Ni1 | Ni3 | Si3 | -113.12(3)  |
| Si2 | Ni1 | Ni3 | C66 | 156.14(3)   | Si2 | Ni1 | Ni3 | C67 | 137.70(3)   |
| Si2 | Ni1 | Ni3 | C77 | -67.27(4)   | Ni3 | Ni1 | N2  | Ni2 | -22.52(8)   |
| Ni3 | Ni1 | N2  | Si1 | 70.61(10)   | Ni3 | Ni1 | N2  | C54 | -149.32(15) |
| N2  | Ni1 | Ni3 | Ni2 | 19.79(8)    | N2  | Ni1 | Ni3 | Ni4 | -172.99(8)  |

|     |     |     |     |             |     |     |     |     |             |
|-----|-----|-----|-----|-------------|-----|-----|-----|-----|-------------|
| N2  | Ni1 | Ni3 | Ni5 | 133.52(8)   | N2  | Ni1 | Ni3 | Si2 | 161.31(8)   |
| N2  | Ni1 | Ni3 | Si3 | 48.19(8)    | N2  | Ni1 | Ni3 | C66 | -42.56(8)   |
| N2  | Ni1 | Ni3 | C67 | -60.99(8)   | N2  | Ni1 | Ni3 | C77 | 94.04(8)    |
| C49 | Ni1 | Ni3 | Ni2 | -175.02(16) | C49 | Ni1 | Ni3 | Ni4 | -7.80(16)   |
| C49 | Ni1 | Ni3 | Ni5 | -61.29(16)  | C49 | Ni1 | Ni3 | Si2 | -33.50(16)  |
| C49 | Ni1 | Ni3 | Si3 | -146.62(16) | C49 | Ni1 | Ni3 | C66 | 122.64(16)  |
| C49 | Ni1 | Ni3 | C67 | 104.20(16)  | C49 | Ni1 | Ni3 | C77 | -100.77(16) |
| Ni3 | Ni1 | C66 | Ni2 | -82.43(8)   | Ni3 | Ni1 | C66 | Ni3 | -0.000(15)  |
| Ni3 | Ni1 | C66 | Si1 | -172.63(17) | Ni3 | Ni1 | C66 | C67 | 34.22(16)   |
| C66 | Ni1 | Ni3 | Ni2 | 62.35(12)   | C66 | Ni1 | Ni3 | Ni4 | -130.44(12) |
| C66 | Ni1 | Ni3 | Ni5 | 176.08(12)  | C66 | Ni1 | Ni3 | Si2 | -156.14(12) |
| C66 | Ni1 | Ni3 | Si3 | 90.74(12)   | C66 | Ni1 | Ni3 | C66 | -0.00(12)   |
| C66 | Ni1 | Ni3 | C67 | -18.43(12)  | C66 | Ni1 | Ni3 | C77 | 136.59(13)  |
| Si1 | Ni1 | Si2 | Ni3 | 41.23(7)    | Si1 | Ni1 | Si2 | Ni5 | 75.21(9)    |
| Si1 | Ni1 | Si2 | C13 | -51.99(9)   | Si1 | Ni1 | Si2 | C19 | -166.74(6)  |
| Si2 | Ni1 | Si1 | Ni2 | -92.65(7)   | Si2 | Ni1 | Si1 | N2  | -152.69(7)  |
| Si2 | Ni1 | Si1 | C1  | 81.68(8)    | Si2 | Ni1 | Si1 | C7  | -102.44(17) |
| Si2 | Ni1 | Si1 | C66 | -31.37(8)   | Si1 | Ni1 | N2  | Ni2 | -93.13(12)  |
| Si1 | Ni1 | N2  | Si1 | -0.00(3)    | Si1 | Ni1 | N2  | C54 | 140.1(2)    |
| N2  | Ni1 | Si1 | Ni2 | 60.04(12)   | N2  | Ni1 | Si1 | N2  | -0.00(12)   |
| N2  | Ni1 | Si1 | C1  | -125.64(13) | N2  | Ni1 | Si1 | C7  | 50.24(19)   |
| N2  | Ni1 | Si1 | C66 | 121.31(13)  | C49 | Ni1 | Si1 | Ni2 | 154.40(15)  |
| C49 | Ni1 | Si1 | N2  | 94.36(15)   | C49 | Ni1 | Si1 | C1  | -31.28(16)  |
| C49 | Ni1 | Si1 | C7  | 144.6(2)    | C49 | Ni1 | Si1 | C66 | -144.33(15) |
| Si1 | Ni1 | C66 | Ni2 | 90.20(13)   | Si1 | Ni1 | C66 | Ni3 | 172.63(18)  |
| Si1 | Ni1 | C66 | Si1 | -0.00(3)    | Si1 | Ni1 | C66 | C67 | -153.2(3)   |
| C66 | Ni1 | Si1 | Ni2 | -61.27(13)  | C66 | Ni1 | Si1 | N2  | -121.31(13) |
| C66 | Ni1 | Si1 | C1  | 113.05(14)  | C66 | Ni1 | Si1 | C7  | -71.1(2)    |
| C66 | Ni1 | Si1 | C66 | -0.00(13)   | C49 | Ni1 | Si2 | Ni3 | 160.69(12)  |
| C49 | Ni1 | Si2 | Ni5 | -165.33(13) | C49 | Ni1 | Si2 | C13 | 67.46(13)   |
| C49 | Ni1 | Si2 | C19 | -47.29(13)  | Si2 | Ni1 | C66 | Ni2 | -105.67(8)  |
| Si2 | Ni1 | C66 | Ni3 | -23.24(11)  | Si2 | Ni1 | C66 | Si1 | 164.14(7)   |
| Si2 | Ni1 | C66 | C67 | 11.0(2)     | C66 | Ni1 | Si2 | Ni3 | 19.04(9)    |
| C66 | Ni1 | Si2 | Ni5 | 53.02(10)   | C66 | Ni1 | Si2 | C13 | -74.19(9)   |
| C66 | Ni1 | Si2 | C19 | 171.06(9)   | C49 | Ni1 | N2  | Ni2 | 166.68(12)  |
| C49 | Ni1 | N2  | Si1 | -100.19(14) | C49 | Ni1 | N2  | C54 | 39.9(2)     |
| N2  | Ni1 | C66 | Ni2 | 54.36(10)   | N2  | Ni1 | C66 | Ni3 | 136.79(13)  |
| N2  | Ni1 | C66 | Si1 | -35.84(11)  | N2  | Ni1 | C66 | C67 | 171.0(3)    |
| C66 | Ni1 | N2  | Ni2 | -55.22(9)   | C66 | Ni1 | N2  | Si1 | 37.91(10)   |



|     |     |     |     |              |     |     |     |     |              |
|-----|-----|-----|-----|--------------|-----|-----|-----|-----|--------------|
| C66 | Ni1 | N2  | C54 | 178.0(2)     | C49 | Ni1 | C66 | Ni2 | 149.4(2)     |
| C49 | Ni1 | C66 | Ni3 | -128.2(2)    | C49 | Ni1 | C66 | Si1 | 59.2(3)      |
| C49 | Ni1 | C66 | C67 | -94.0(3)     | Ni1 | Ni2 | Ni3 | Ni1 | 0.0          |
| Ni1 | Ni2 | Ni3 | Ni4 | -165.61(3)   | Ni1 | Ni2 | Ni3 | Ni5 | -83.98(2)    |
| Ni1 | Ni2 | Ni3 | Si2 | -29.927(13)  | Ni1 | Ni2 | Ni3 | Si3 | -145.397(15) |
| Ni1 | Ni2 | Ni3 | C66 | 74.806(16)   | Ni1 | Ni2 | Ni3 | C67 | 99.237(19)   |
| Ni1 | Ni2 | Ni3 | C77 | -137.531(18) | Ni1 | Ni2 | Si1 | Ni1 | 0.000(13)    |
| Ni1 | Ni2 | Si1 | N2  | 63.05(2)     | Ni1 | Ni2 | Si1 | C1  | -11.04(9)    |
| Ni1 | Ni2 | Si1 | C7  | 176.53(6)    | Ni1 | Ni2 | Si1 | C66 | -76.58(3)    |
| Ni1 | Ni2 | Si3 | Ni3 | 32.21(2)     | Ni1 | Ni2 | Si3 | C25 | 149.47(4)    |
| Ni1 | Ni2 | Si3 | C31 | -91.73(5)    | Ni1 | Ni2 | Si3 | C77 | 23.69(5)     |
| Ni1 | Ni2 | N2  | Ni1 | 0.000(11)    | Ni1 | Ni2 | N2  | Si1 | -89.84(14)   |
| Ni1 | Ni2 | N2  | C54 | 123.72(18)   | Ni1 | Ni2 | C66 | Ni1 | 0.000(13)    |
| Ni1 | Ni2 | C66 | Ni3 | -73.84(7)    | Ni1 | Ni2 | C66 | Si1 | 77.85(9)     |
| Ni1 | Ni2 | C66 | C67 | -119.6(2)    | Ni3 | Ni2 | Si1 | Ni1 | 55.111(18)   |
| Ni3 | Ni2 | Si1 | N2  | 118.16(3)    | Ni3 | Ni2 | Si1 | C1  | 44.07(11)    |
| Ni3 | Ni2 | Si1 | C7  | -128.36(4)   | Ni3 | Ni2 | Si1 | C66 | -21.47(2)    |
| Si1 | Ni2 | Ni3 | Ni1 | -55.92(2)    | Si1 | Ni2 | Ni3 | Ni4 | 138.47(4)    |
| Si1 | Ni2 | Ni3 | Ni5 | -139.90(3)   | Si1 | Ni2 | Ni3 | Si2 | -85.85(2)    |
| Si1 | Ni2 | Ni3 | Si3 | 158.68(2)    | Si1 | Ni2 | Ni3 | C66 | 18.88(2)     |
| Si1 | Ni2 | Ni3 | C67 | 43.31(2)     | Si1 | Ni2 | Ni3 | C77 | 166.55(2)    |
| Ni3 | Ni2 | Si3 | Ni3 | 0.0          | Ni3 | Ni2 | Si3 | C25 | 117.26(5)    |
| Ni3 | Ni2 | Si3 | C31 | -123.94(5)   | Ni3 | Ni2 | Si3 | C77 | -8.52(3)     |
| Si3 | Ni2 | Ni3 | Ni1 | 145.40(3)    | Si3 | Ni2 | Ni3 | Ni4 | -20.21(4)    |
| Si3 | Ni2 | Ni3 | Ni5 | 61.42(3)     | Si3 | Ni2 | Ni3 | Si2 | 115.47(3)    |
| Si3 | Ni2 | Ni3 | Si3 | 0.00(2)      | Si3 | Ni2 | Ni3 | C66 | -139.80(3)   |
| Si3 | Ni2 | Ni3 | C67 | -115.37(3)   | Si3 | Ni2 | Ni3 | C77 | 7.87(3)      |
| Ni3 | Ni2 | N2  | Ni1 | 22.35(8)     | Ni3 | Ni2 | N2  | Si1 | -67.49(11)   |
| Ni3 | Ni2 | N2  | C54 | 146.07(15)   | N2  | Ni2 | Ni3 | Ni1 | -20.02(7)    |
| N2  | Ni2 | Ni3 | Ni4 | 174.37(7)    | N2  | Ni2 | Ni3 | Ni5 | -104.00(7)   |
| N2  | Ni2 | Ni3 | Si2 | -49.94(7)    | N2  | Ni2 | Ni3 | Si3 | -165.41(7)   |
| N2  | Ni2 | Ni3 | C66 | 54.79(7)     | N2  | Ni2 | Ni3 | C67 | 79.22(7)     |
| N2  | Ni2 | Ni3 | C77 | -157.55(7)   | C58 | Ni2 | Ni3 | Ni1 | 138.97(18)   |
| C58 | Ni2 | Ni3 | Ni4 | -26.64(19)   | C58 | Ni2 | Ni3 | Ni5 | 54.99(18)    |
| C58 | Ni2 | Ni3 | Si2 | 109.05(18)   | C58 | Ni2 | Ni3 | Si3 | -6.42(18)    |
| C58 | Ni2 | Ni3 | C66 | -146.22(18)  | C58 | Ni2 | Ni3 | C67 | -121.79(18)  |
| C58 | Ni2 | Ni3 | C77 | 1.44(18)     | Ni3 | Ni2 | C66 | Ni1 | 73.84(7)     |
| Ni3 | Ni2 | C66 | Ni3 | 0.000(13)    | Ni3 | Ni2 | C66 | Si1 | 151.69(14)   |
| Ni3 | Ni2 | C66 | C67 | -45.72(17)   | C66 | Ni2 | Ni3 | Ni1 | -74.81(10)   |

|     |     |     |     |             |     |     |     |     |             |
|-----|-----|-----|-----|-------------|-----|-----|-----|-----|-------------|
| C66 | Ni2 | Ni3 | Ni4 | 119.58(11)  | C66 | Ni2 | Ni3 | Ni5 | -158.79(10) |
| C66 | Ni2 | Ni3 | Si2 | -104.73(10) | C66 | Ni2 | Ni3 | Si3 | 139.80(10)  |
| C66 | Ni2 | Ni3 | C66 | 0.00(10)    | C66 | Ni2 | Ni3 | C67 | 24.43(10)   |
| C66 | Ni2 | Ni3 | C77 | 147.66(10)  | Si1 | Ni2 | Si3 | Ni3 | -39.17(6)   |
| Si1 | Ni2 | Si3 | C25 | 78.09(8)    | Si1 | Ni2 | Si3 | C31 | -163.11(4)  |
| Si1 | Ni2 | Si3 | C77 | -47.69(7)   | Si3 | Ni2 | Si1 | Ni1 | 88.80(6)    |
| Si3 | Ni2 | Si1 | N2  | 151.85(6)   | Si3 | Ni2 | Si1 | C1  | 77.76(12)   |
| Si3 | Ni2 | Si1 | C7  | -94.67(7)   | Si3 | Ni2 | Si1 | C66 | 12.22(6)    |
| Si1 | Ni2 | N2  | Ni1 | 89.84(15)   | Si1 | Ni2 | N2  | Si1 | 0.00(3)     |
| Si1 | Ni2 | N2  | C54 | -146.4(3)   | N2  | Ni2 | Si1 | Ni1 | -63.05(14)  |
| N2  | Ni2 | Si1 | N2  | -0.00(14)   | N2  | Ni2 | Si1 | C1  | -74.09(17)  |
| N2  | Ni2 | Si1 | C7  | 113.48(15)  | N2  | Ni2 | Si1 | C66 | -139.63(14) |
| C58 | Ni2 | Si1 | Ni1 | -135.58(15) | C58 | Ni2 | Si1 | N2  | -72.53(15)  |
| C58 | Ni2 | Si1 | C1  | -146.62(17) | C58 | Ni2 | Si1 | C7  | 40.95(16)   |
| C58 | Ni2 | Si1 | C66 | 147.84(15)  | Si1 | Ni2 | C66 | Ni1 | -77.85(9)   |
| Si1 | Ni2 | C66 | Ni3 | -151.69(14) | Si1 | Ni2 | C66 | Si1 | -0.00(2)    |
| Si1 | Ni2 | C66 | C67 | 162.6(3)    | C66 | Ni2 | Si1 | Ni1 | 76.58(11)   |
| C66 | Ni2 | Si1 | N2  | 139.63(12)  | C66 | Ni2 | Si1 | C1  | 65.54(15)   |
| C66 | Ni2 | Si1 | C7  | -106.89(12) | C66 | Ni2 | Si1 | C66 | -0.00(11)   |
| C58 | Ni2 | Si3 | Ni3 | 176.17(10)  | C58 | Ni2 | Si3 | C25 | -66.57(11)  |
| C58 | Ni2 | Si3 | C31 | 52.23(11)   | C58 | Ni2 | Si3 | C77 | 167.65(11)  |
| Si3 | Ni2 | C66 | Ni1 | 109.32(5)   | Si3 | Ni2 | C66 | Ni3 | 35.47(8)    |
| Si3 | Ni2 | C66 | Si1 | -172.84(7)  | Si3 | Ni2 | C66 | C67 | -10.2(2)    |
| C66 | Ni2 | Si3 | Ni3 | -30.66(8)   | C66 | Ni2 | Si3 | C25 | 86.59(9)    |
| C66 | Ni2 | Si3 | C31 | -154.61(9)  | C66 | Ni2 | Si3 | C77 | -39.19(9)   |
| C58 | Ni2 | N2  | Ni1 | -144.86(11) | C58 | Ni2 | N2  | Si1 | 125.29(14)  |
| C58 | Ni2 | N2  | C54 | -21.1(2)    | N2  | Ni2 | C66 | Ni1 | -52.82(8)   |
| N2  | Ni2 | C66 | Ni3 | -126.67(10) | N2  | Ni2 | C66 | Si1 | 25.02(10)   |
| N2  | Ni2 | C66 | C67 | -172.4(2)   | C66 | Ni2 | N2  | Ni1 | 62.80(10)   |
| C66 | Ni2 | N2  | Si1 | -27.05(12)  | C66 | Ni2 | N2  | C54 | -173.48(19) |
| C58 | Ni2 | C66 | Ni1 | -152.9(3)   | C58 | Ni2 | C66 | Ni3 | 133.3(3)    |
| C58 | Ni2 | C66 | Si1 | -75.0(4)    | C58 | Ni2 | C66 | C67 | 87.6(4)     |
| Ni1 | Ni3 | Ni4 | Ni5 | -61.56(3)   | Ni1 | Ni3 | Ni4 | Si4 | 105.37(4)   |
| Ni1 | Ni3 | Ni4 | N6  | -101.55(4)  | Ni1 | Ni3 | Ni4 | C72 | 26.05(6)    |
| Ni1 | Ni3 | Ni4 | C77 | -121.47(4)  | Ni1 | Ni3 | Ni5 | Ni4 | 151.71(2)   |
| Ni1 | Ni3 | Ni5 | Si2 | 27.458(18)  | Ni1 | Ni3 | Ni5 | N6  | -168.42(2)  |
| Ni1 | Ni3 | Ni5 | C77 | -146.38(3)  | Ni1 | Ni3 | Si2 | Ni1 | 0.000(13)   |
| Ni1 | Ni3 | Si2 | Ni5 | -144.29(4)  | Ni1 | Ni3 | Si2 | C13 | 112.03(3)   |
| Ni1 | Ni3 | Si2 | C19 | -76.35(9)   | Ni1 | Ni3 | Si3 | Ni2 | -30.49(2)   |

|     |     |     |     |             |     |     |     |     |             |
|-----|-----|-----|-----|-------------|-----|-----|-----|-----|-------------|
| Ni1 | Ni3 | Si3 | C25 | -129.58(5)  | Ni1 | Ni3 | Si3 | C31 | 62.13(7)    |
| Ni1 | Ni3 | Si3 | C77 | 139.30(2)   | Ni1 | Ni3 | C66 | Ni1 | -0.000(13)  |
| Ni1 | Ni3 | C66 | Ni2 | 71.69(8)    | Ni1 | Ni3 | C66 | Si1 | 13.1(3)     |
| Ni1 | Ni3 | C66 | C67 | -149.66(17) | Ni1 | Ni3 | C67 | N4  | -154.6(3)   |
| Ni1 | Ni3 | C67 | C66 | 26.33(13)   | Ni1 | Ni3 | C77 | Ni4 | 138.31(9)   |
| Ni1 | Ni3 | C77 | Ni5 | 53.2(2)     | Ni1 | Ni3 | C77 | Si3 | -66.30(14)  |
| Ni1 | Ni3 | C77 | N6  | 98.4(3)     | Ni2 | Ni3 | Ni4 | Ni5 | 94.87(4)    |
| Ni2 | Ni3 | Ni4 | Si4 | -98.20(4)   | Ni2 | Ni3 | Ni4 | N6  | 54.88(4)    |
| Ni2 | Ni3 | Ni4 | C72 | -177.51(3)  | Ni2 | Ni3 | Ni4 | C77 | 34.96(3)    |
| Ni2 | Ni3 | Ni5 | Ni4 | -148.71(3)  | Ni2 | Ni3 | Ni5 | Si2 | 87.04(2)    |
| Ni2 | Ni3 | Ni5 | N6  | -108.83(2)  | Ni2 | Ni3 | Ni5 | C77 | -86.80(2)   |
| Ni2 | Ni3 | Si2 | Ni1 | 33.21(2)    | Ni2 | Ni3 | Si2 | Ni5 | -111.08(2)  |
| Ni2 | Ni3 | Si2 | C13 | 145.24(3)   | Ni2 | Ni3 | Si2 | C19 | -43.14(9)   |
| Ni2 | Ni3 | Si3 | Ni2 | 0.0         | Ni2 | Ni3 | Si3 | C25 | -99.09(6)   |
| Ni2 | Ni3 | Si3 | C31 | 92.62(7)    | Ni2 | Ni3 | Si3 | C77 | 169.79(3)   |
| Ni2 | Ni3 | C66 | Ni1 | -71.69(8)   | Ni2 | Ni3 | C66 | Ni2 | 0.000(12)   |
| Ni2 | Ni3 | C66 | Si1 | -58.6(3)    | Ni2 | Ni3 | C66 | C67 | 138.64(16)  |
| Ni2 | Ni3 | C67 | N4  | 146.9(3)    | Ni2 | Ni3 | C67 | C66 | -32.18(12)  |
| Ni2 | Ni3 | C77 | Ni4 | -163.80(5)  | Ni2 | Ni3 | C77 | Ni5 | 111.12(9)   |
| Ni2 | Ni3 | C77 | Si3 | -8.41(9)    | Ni2 | Ni3 | C77 | N6  | 156.3(2)    |
| Ni4 | Ni3 | Ni5 | Ni4 | 0.000(12)   | Ni4 | Ni3 | Ni5 | Si2 | -124.25(2)  |
| Ni4 | Ni3 | Ni5 | N6  | 39.877(18)  | Ni4 | Ni3 | Ni5 | C77 | 61.914(18)  |
| Ni5 | Ni3 | Ni4 | Ni5 | 0.000(12)   | Ni5 | Ni3 | Ni4 | Si4 | 166.93(2)   |
| Ni5 | Ni3 | Ni4 | N6  | -39.992(16) | Ni5 | Ni3 | Ni4 | C72 | 87.62(4)    |
| Ni5 | Ni3 | Ni4 | C77 | -59.913(15) | Ni4 | Ni3 | Si2 | Ni1 | -166.44(2)  |
| Ni4 | Ni3 | Si2 | Ni5 | 49.27(3)    | Ni4 | Ni3 | Si2 | C13 | -54.41(3)   |
| Ni4 | Ni3 | Si2 | C19 | 117.21(9)   | Si2 | Ni3 | Ni4 | Ni5 | -41.47(2)   |
| Si2 | Ni3 | Ni4 | Si4 | 125.47(2)   | Si2 | Ni3 | Ni4 | N6  | -81.46(2)   |
| Si2 | Ni3 | Ni4 | C72 | 46.15(4)    | Si2 | Ni3 | Ni4 | C77 | -101.38(2)  |
| Ni4 | Ni3 | Si3 | Ni2 | 170.409(18) | Ni4 | Ni3 | Si3 | C25 | 71.32(6)    |
| Ni4 | Ni3 | Si3 | C31 | -96.97(6)   | Ni4 | Ni3 | Si3 | C77 | -19.80(2)   |
| Si3 | Ni3 | Ni4 | Ni5 | 78.48(2)    | Si3 | Ni3 | Ni4 | Si4 | -114.59(2)  |
| Si3 | Ni3 | Ni4 | N6  | 38.48(2)    | Si3 | Ni3 | Ni4 | C72 | 166.09(4)   |
| Si3 | Ni3 | Ni4 | C77 | 18.563(19)  | Ni4 | Ni3 | C66 | Ni1 | 144.50(7)   |
| Ni4 | Ni3 | C66 | Ni2 | -143.80(7)  | Ni4 | Ni3 | C66 | Si1 | 157.6(3)    |
| Ni4 | Ni3 | C66 | C67 | -5.2(2)     | C66 | Ni3 | Ni4 | Ni5 | -169.84(13) |
| C66 | Ni3 | Ni4 | Si4 | -2.91(13)   | C66 | Ni3 | Ni4 | N6  | 150.16(13)  |
| C66 | Ni3 | Ni4 | C72 | -82.23(14)  | C66 | Ni3 | Ni4 | C77 | 130.24(13)  |
| Ni4 | Ni3 | C67 | N4  | -4.6(3)     | Ni4 | Ni3 | C67 | C66 | 176.36(11)  |

|     |     |     |     |             |     |     |     |     |             |
|-----|-----|-----|-----|-------------|-----|-----|-----|-----|-------------|
| C67 | Ni3 | Ni4 | Ni5 | -173.08(10) | C67 | Ni3 | Ni4 | Si4 | -6.15(10)   |
| C67 | Ni3 | Ni4 | N6  | 146.93(10)  | C67 | Ni3 | Ni4 | C72 | -85.47(10)  |
| C67 | Ni3 | Ni4 | C77 | 127.01(10)  | Ni4 | Ni3 | C77 | Ni4 | 0.00(11)    |
| Ni4 | Ni3 | C77 | Ni5 | -85.08(11)  | Ni4 | Ni3 | C77 | Si3 | 155.39(13)  |
| Ni4 | Ni3 | C77 | N6  | -39.9(2)    | C77 | Ni3 | Ni4 | Ni5 | 59.91(10)   |
| C77 | Ni3 | Ni4 | Si4 | -133.15(10) | C77 | Ni3 | Ni4 | N6  | 19.92(10)   |
| C77 | Ni3 | Ni4 | C72 | 147.53(11)  | C77 | Ni3 | Ni4 | C77 | 0.00(10)    |
| Ni5 | Ni3 | Si2 | Ni1 | 144.29(4)   | Ni5 | Ni3 | Si2 | Ni5 | 0.00(15)    |
| Ni5 | Ni3 | Si2 | C13 | -103.68(4)  | Ni5 | Ni3 | Si2 | C19 | 67.94(8)    |
| Si2 | Ni3 | Ni5 | Ni4 | 124.25(4)   | Si2 | Ni3 | Ni5 | Si2 | -0.00(3)    |
| Si2 | Ni3 | Ni5 | N6  | 164.13(4)   | Si2 | Ni3 | Ni5 | C77 | -173.84(4)  |
| Ni5 | Ni3 | Si3 | Ni2 | -126.20(2)  | Ni5 | Ni3 | Si3 | C25 | 134.71(6)   |
| Ni5 | Ni3 | Si3 | C31 | -33.58(6)   | Ni5 | Ni3 | Si3 | C77 | 43.59(2)    |
| Si3 | Ni3 | Ni5 | Ni4 | -103.26(3)  | Si3 | Ni3 | Ni5 | Si2 | 132.49(3)   |
| Si3 | Ni3 | Ni5 | N6  | -63.38(3)   | Si3 | Ni3 | Ni5 | C77 | -41.35(3)   |
| Ni5 | Ni3 | C66 | Ni1 | -10.4(3)    | Ni5 | Ni3 | C66 | Ni2 | 61.3(3)     |
| Ni5 | Ni3 | C66 | Si1 | 2.7(6)      | Ni5 | Ni3 | C66 | C67 | -160.04(16) |
| C66 | Ni3 | Ni5 | Ni4 | 160.8(3)    | C66 | Ni3 | Ni5 | Si2 | 36.6(3)     |
| C66 | Ni3 | Ni5 | N6  | -159.3(3)   | C66 | Ni3 | Ni5 | C77 | -137.2(3)   |
| Ni5 | Ni3 | C77 | Ni4 | 85.08(12)   | Ni5 | Ni3 | C77 | Ni5 | 0.00(16)    |
| Ni5 | Ni3 | C77 | Si3 | -119.53(15) | Ni5 | Ni3 | C77 | N6  | 45.13(19)   |
| C77 | Ni3 | Ni5 | Ni4 | -61.91(15)  | C77 | Ni3 | Ni5 | Si2 | 173.84(15)  |
| C77 | Ni3 | Ni5 | N6  | -22.04(15)  | C77 | Ni3 | Ni5 | C77 | 0.00(15)    |
| Si2 | Ni3 | Si3 | Ni2 | -84.93(3)   | Si2 | Ni3 | Si3 | C25 | 175.98(5)   |
| Si2 | Ni3 | Si3 | C31 | 7.69(8)     | Si2 | Ni3 | Si3 | C77 | 84.86(4)    |
| Si3 | Ni3 | Si2 | Ni1 | 88.48(4)    | Si3 | Ni3 | Si2 | Ni5 | -55.81(4)   |
| Si3 | Ni3 | Si2 | C13 | -159.49(4)  | Si3 | Ni3 | Si2 | C19 | 12.13(11)   |
| Si2 | Ni3 | C66 | Ni1 | 19.59(10)   | Si2 | Ni3 | C66 | Ni2 | 91.29(8)    |
| Si2 | Ni3 | C66 | Si1 | 32.6(4)     | Si2 | Ni3 | C66 | C67 | -130.07(10) |
| C66 | Ni3 | Si2 | Ni1 | -21.97(12)  | C66 | Ni3 | Si2 | Ni5 | -166.26(12) |
| C66 | Ni3 | Si2 | C13 | 90.06(12)   | C66 | Ni3 | Si2 | C19 | -98.32(14)  |
| Si2 | Ni3 | C67 | N4  | -111.6(2)   | Si2 | Ni3 | C67 | C66 | 69.33(19)   |
| C67 | Ni3 | Si2 | Ni1 | -60.06(16)  | C67 | Ni3 | Si2 | Ni5 | 155.65(16)  |
| C67 | Ni3 | Si2 | C13 | 51.97(16)   | C67 | Ni3 | Si2 | C19 | -136.41(17) |
| Si2 | Ni3 | C77 | Ni4 | 90.11(7)    | Si2 | Ni3 | C77 | Ni5 | 5.03(13)    |
| Si2 | Ni3 | C77 | Si3 | -114.50(7)  | Si2 | Ni3 | C77 | N6  | 50.2(3)     |
| C77 | Ni3 | Si2 | Ni1 | 139.28(13)  | C77 | Ni3 | Si2 | Ni5 | -5.00(13)   |
| C77 | Ni3 | Si2 | C13 | -108.68(13) | C77 | Ni3 | Si2 | C19 | 62.94(16)   |
| Si3 | Ni3 | C66 | Ni1 | -103.42(6)  | Si3 | Ni3 | C66 | Ni2 | -31.73(8)   |

|     |     |     |     |             |     |     |     |     |             |
|-----|-----|-----|-----|-------------|-----|-----|-----|-----|-------------|
| Si3 | Ni3 | C66 | Si1 | -90.4(3)    | Si3 | Ni3 | C66 | C67 | 106.92(12)  |
| C66 | Ni3 | Si3 | Ni2 | 31.56(9)    | C66 | Ni3 | Si3 | C25 | -67.53(11)  |
| C66 | Ni3 | Si3 | C31 | 124.18(11)  | C66 | Ni3 | Si3 | C77 | -158.65(9)  |
| Si3 | Ni3 | C67 | N4  | 97.3(3)     | Si3 | Ni3 | C67 | C66 | -81.78(13)  |
| C67 | Ni3 | Si3 | Ni2 | 70.12(12)   | C67 | Ni3 | Si3 | C25 | -28.97(13)  |
| C67 | Ni3 | Si3 | C31 | 162.74(13)  | C67 | Ni3 | Si3 | C77 | -120.09(12) |
| Si3 | Ni3 | C77 | Ni4 | -155.39(13) | Si3 | Ni3 | C77 | Ni5 | 119.53(15)  |
| Si3 | Ni3 | C77 | Si3 | 0.00(3)     | Si3 | Ni3 | C77 | N6  | 164.7(3)    |
| C77 | Ni3 | Si3 | Ni2 | -169.79(12) | C77 | Ni3 | Si3 | C25 | 91.12(13)   |
| C77 | Ni3 | Si3 | C31 | -77.17(12)  | C77 | Ni3 | Si3 | C77 | 0.00(11)    |
| C66 | Ni3 | C67 | N4  | 179.1(4)    | C66 | Ni3 | C67 | C66 | 0.00(15)    |
| C67 | Ni3 | C66 | Ni1 | 149.7(2)    | C67 | Ni3 | C66 | Ni2 | -138.6(2)   |
| C67 | Ni3 | C66 | Si1 | 162.7(5)    | C67 | Ni3 | C66 | C67 | -0.00(16)   |
| C66 | Ni3 | C77 | Ni4 | -119.5(2)   | C66 | Ni3 | C77 | Ni5 | 155.42(18)  |
| C66 | Ni3 | C77 | Si3 | 35.9(3)     | C66 | Ni3 | C77 | N6  | -159.4(2)   |
| C77 | Ni3 | C66 | Ni1 | -130.0(2)   | C77 | Ni3 | C66 | Ni2 | -58.3(2)    |
| C77 | Ni3 | C66 | Si1 | -116.9(3)   | C77 | Ni3 | C66 | C67 | 80.4(3)     |
| C67 | Ni3 | C77 | Ni4 | -71.98(18)  | C67 | Ni3 | C77 | Ni5 | -157.06(15) |
| C67 | Ni3 | C77 | Si3 | 83.40(19)   | C67 | Ni3 | C77 | N6  | -111.9(3)   |
| C77 | Ni3 | C67 | N4  | 45.7(4)     | C77 | Ni3 | C67 | C66 | -133.34(17) |
| Ni3 | Ni4 | Ni5 | Ni3 | 0.000(13)   | Ni3 | Ni4 | Ni5 | Si2 | 51.042(19)  |
| Ni3 | Ni4 | Ni5 | N6  | -117.48(2)  | Ni3 | Ni4 | Ni5 | C77 | -62.362(18) |
| Ni3 | Ni4 | Ni5 | C82 | 164.52(4)   | Ni3 | Ni4 | Si4 | N4  | 14.08(4)    |
| Ni3 | Ni4 | Si4 | C37 | -116.19(5)  | Ni3 | Ni4 | Si4 | C43 | 125.11(4)   |
| Ni3 | Ni4 | N6  | Ni5 | 48.99(8)    | Ni3 | Ni4 | N6  | C77 | -23.99(8)   |
| Ni3 | Ni4 | N6  | C78 | -156.3(2)   | Ni3 | Ni4 | C77 | Ni3 | 0.000(11)   |
| Ni3 | Ni4 | C77 | Ni5 | 79.96(10)   | Ni3 | Ni4 | C77 | Si3 | -49.4(3)    |
| Ni3 | Ni4 | C77 | N6  | 147.90(16)  | Ni5 | Ni4 | Si4 | N4  | 31.83(8)    |
| Ni5 | Ni4 | Si4 | C37 | -98.44(7)   | Ni5 | Ni4 | Si4 | C43 | 142.86(4)   |
| Si4 | Ni4 | Ni5 | Ni3 | -21.00(5)   | Si4 | Ni4 | Ni5 | Si2 | 30.05(6)    |
| Si4 | Ni4 | Ni5 | N6  | -138.48(6)  | Si4 | Ni4 | Ni5 | C77 | -83.36(5)   |
| Si4 | Ni4 | Ni5 | C82 | 143.52(5)   | Ni5 | Ni4 | N6  | Ni5 | -0.000(14)  |
| Ni5 | Ni4 | N6  | C77 | -72.98(11)  | Ni5 | Ni4 | N6  | C78 | 154.7(3)    |
| N6  | Ni4 | Ni5 | Ni3 | 117.48(12)  | N6  | Ni4 | Ni5 | Si2 | 168.52(13)  |
| N6  | Ni4 | Ni5 | N6  | 0.00(12)    | N6  | Ni4 | Ni5 | C77 | 55.12(12)   |
| N6  | Ni4 | Ni5 | C82 | -78.00(13)  | C72 | Ni4 | Ni5 | Ni3 | -146.13(11) |
| C72 | Ni4 | Ni5 | Si2 | -95.09(11)  | C72 | Ni4 | Ni5 | N6  | 96.39(11)   |
| C72 | Ni4 | Ni5 | C77 | 151.51(11)  | C72 | Ni4 | Ni5 | C82 | 18.39(12)   |
| Ni5 | Ni4 | C77 | Ni3 | -79.96(10)  | Ni5 | Ni4 | C77 | Ni5 | 0.000(13)   |

|     |     |     |     |             |     |     |     |     |             |
|-----|-----|-----|-----|-------------|-----|-----|-----|-----|-------------|
| Ni5 | Ni4 | C77 | Si3 | -129.4(4)   | Ni5 | Ni4 | C77 | N6  | 67.94(9)    |
| C77 | Ni4 | Ni5 | Ni3 | 62.36(11)   | C77 | Ni4 | Ni5 | Si2 | 113.40(11)  |
| C77 | Ni4 | Ni5 | N6  | -55.12(11)  | C77 | Ni4 | Ni5 | C77 | -0.00(11)   |
| C77 | Ni4 | Ni5 | C82 | -133.12(11) | Si4 | Ni4 | N6  | Ni5 | 119.46(14)  |
| Si4 | Ni4 | N6  | C77 | 46.5(2)     | Si4 | Ni4 | N6  | C78 | -85.8(3)    |
| N6  | Ni4 | Si4 | N4  | -56.4(2)    | N6  | Ni4 | Si4 | C37 | 173.35(19)  |
| N6  | Ni4 | Si4 | C43 | 54.6(2)     | C72 | Ni4 | Si4 | N4  | 164.63(11)  |
| C72 | Ni4 | Si4 | C37 | 34.36(11)   | C72 | Ni4 | Si4 | C43 | -84.34(11)  |
| Si4 | Ni4 | C77 | Ni3 | 55.18(10)   | Si4 | Ni4 | C77 | Ni5 | 135.14(6)   |
| Si4 | Ni4 | C77 | Si3 | 5.8(3)      | Si4 | Ni4 | C77 | N6  | -156.92(7)  |
| C77 | Ni4 | Si4 | N4  | -24.83(11)  | C77 | Ni4 | Si4 | C37 | -155.10(10) |
| C77 | Ni4 | Si4 | C43 | 86.19(11)   | C72 | Ni4 | N6  | Ni5 | -105.66(14) |
| C72 | Ni4 | N6  | C77 | -178.64(13) | C72 | Ni4 | N6  | C78 | 49.0(2)     |
| N6  | Ni4 | C77 | Ni3 | -147.9(2)   | N6  | Ni4 | C77 | Ni5 | -67.94(14)  |
| N6  | Ni4 | C77 | Si3 | 162.7(4)    | N6  | Ni4 | C77 | N6  | 0.00(11)    |
| C77 | Ni4 | N6  | Ni5 | 72.98(17)   | C77 | Ni4 | N6  | C77 | 0.00(13)    |
| C77 | Ni4 | N6  | C78 | -132.3(3)   | C72 | Ni4 | C77 | Ni3 | -145.2(2)   |
| C72 | Ni4 | C77 | Ni5 | -65.3(3)    | C72 | Ni4 | C77 | Si3 | 165.3(3)    |
| C72 | Ni4 | C77 | N6  | 2.7(3)      | Ni3 | Ni5 | Si2 | Ni1 | -34.64(3)   |
| Ni3 | Ni5 | Si2 | Ni3 | 0.000(13)   | Ni3 | Ni5 | Si2 | C13 | 96.19(3)    |
| Ni3 | Ni5 | Si2 | C19 | -153.70(6)  | Ni3 | Ni5 | N6  | Ni4 | -48.39(8)   |
| Ni3 | Ni5 | N6  | C77 | 26.29(9)    | Ni3 | Ni5 | N6  | C78 | 160.1(3)    |
| Ni3 | Ni5 | C77 | Ni3 | -0.000(16)  | Ni3 | Ni5 | C77 | Ni4 | -78.03(10)  |
| Ni3 | Ni5 | C77 | Si3 | 74.04(14)   | Ni3 | Ni5 | C77 | N6  | -144.5(2)   |
| Ni4 | Ni5 | Si2 | Ni1 | -79.89(5)   | Ni4 | Ni5 | Si2 | Ni3 | -45.25(2)   |
| Ni4 | Ni5 | Si2 | C13 | 50.94(4)    | Ni4 | Ni5 | Si2 | C19 | 161.06(4)   |
| Ni4 | Ni5 | N6  | Ni4 | 0.000(14)   | Ni4 | Ni5 | N6  | C77 | 74.68(8)    |
| Ni4 | Ni5 | N6  | C78 | -151.6(4)   | Ni4 | Ni5 | C77 | Ni3 | 78.03(10)   |
| Ni4 | Ni5 | C77 | Ni4 | -0.000(13)  | Ni4 | Ni5 | C77 | Si3 | 152.07(19)  |
| Ni4 | Ni5 | C77 | N6  | -66.50(14)  | Si2 | Ni5 | N6  | Ni4 | -20.9(2)    |
| Si2 | Ni5 | N6  | C77 | 53.8(3)     | Si2 | Ni5 | N6  | C78 | -172.47(15) |
| N6  | Ni5 | Si2 | Ni1 | -64.6(2)    | N6  | Ni5 | Si2 | Ni3 | -30.01(19)  |
| N6  | Ni5 | Si2 | C13 | 66.18(19)   | N6  | Ni5 | Si2 | C19 | 176.30(18)  |
| Si2 | Ni5 | C77 | Ni3 | -6.29(16)   | Si2 | Ni5 | C77 | Ni4 | -84.32(11)  |
| Si2 | Ni5 | C77 | Si3 | 67.75(16)   | Si2 | Ni5 | C77 | N6  | -150.81(8)  |
| C77 | Ni5 | Si2 | Ni1 | -29.44(14)  | C77 | Ni5 | Si2 | Ni3 | 5.20(13)    |
| C77 | Ni5 | Si2 | C13 | 101.38(13)  | C77 | Ni5 | Si2 | C19 | -148.50(13) |
| C82 | Ni5 | Si2 | Ni1 | 141.88(16)  | C82 | Ni5 | Si2 | Ni3 | 176.52(15)  |
| C82 | Ni5 | Si2 | C13 | -87.29(15)  | C82 | Ni5 | Si2 | C19 | 22.82(16)   |

|     |     |     |     |             |     |     |     |     |             |
|-----|-----|-----|-----|-------------|-----|-----|-----|-----|-------------|
| N6  | Ni5 | C77 | Ni3 | 144.5(3)    | N6  | Ni5 | C77 | Ni4 | 66.50(19)   |
| N6  | Ni5 | C77 | Si3 | -141.4(3)   | N6  | Ni5 | C77 | N6  | -0.00(13)   |
| C77 | Ni5 | N6  | Ni4 | -74.68(17)  | C77 | Ni5 | N6  | C77 | 0.00(15)    |
| C77 | Ni5 | N6  | C78 | 133.8(4)    | C82 | Ni5 | N6  | Ni4 | 130.56(17)  |
| C82 | Ni5 | N6  | C77 | -154.75(17) | C82 | Ni5 | N6  | C78 | -21.0(4)    |
| C82 | Ni5 | C77 | Ni3 | -170.9(3)   | C82 | Ni5 | C77 | Ni4 | 111.1(3)    |
| C82 | Ni5 | C77 | Si3 | -96.9(3)    | C82 | Ni5 | C77 | N6  | 44.6(4)     |
| Ni1 | Si1 | N2  | Ni1 | -0.000(14)  | Ni1 | Si1 | N2  | Ni2 | 78.39(11)   |
| Ni1 | Si1 | N2  | C54 | -136.5(3)   | Ni1 | Si1 | C1  | C2  | -53.82(19)  |
| Ni1 | Si1 | C1  | C6  | 124.79(19)  | Ni1 | Si1 | C7  | C8  | 175.82(15)  |
| Ni1 | Si1 | C7  | C12 | 1.5(6)      | Ni1 | Si1 | C66 | Ni1 | 0.000(12)   |
| Ni1 | Si1 | C66 | Ni2 | -68.85(7)   | Ni1 | Si1 | C66 | Ni3 | -12.6(3)    |
| Ni1 | Si1 | C66 | C67 | 138.2(5)    | Ni2 | Si1 | N2  | Ni1 | -78.39(11)  |
| Ni2 | Si1 | N2  | Ni2 | -0.000(14)  | Ni2 | Si1 | N2  | C54 | 145.2(3)    |
| Ni2 | Si1 | C1  | C2  | -44.6(4)    | Ni2 | Si1 | C1  | C6  | 133.97(17)  |
| Ni2 | Si1 | C7  | C8  | 167.4(2)    | Ni2 | Si1 | C7  | C12 | -6.9(3)     |
| Ni2 | Si1 | C66 | Ni1 | 68.85(7)    | Ni2 | Si1 | C66 | Ni2 | 0.000(11)   |
| Ni2 | Si1 | C66 | Ni3 | 56.3(3)     | Ni2 | Si1 | C66 | C67 | -153.0(5)   |
| N2  | Si1 | C1  | C2  | -98.3(2)    | N2  | Si1 | C1  | C6  | 80.4(2)     |
| C1  | Si1 | N2  | Ni1 | 67.30(18)   | C1  | Si1 | N2  | Ni2 | 145.68(15)  |
| C1  | Si1 | N2  | C54 | -69.2(3)    | N2  | Si1 | C7  | C8  | -143.6(3)   |
| N2  | Si1 | C7  | C12 | 42.0(3)     | C7  | Si1 | N2  | Ni1 | -162.73(13) |
| C7  | Si1 | N2  | Ni2 | -84.35(17)  | C7  | Si1 | N2  | C54 | 60.8(3)     |
| N2  | Si1 | C66 | Ni1 | 40.35(12)   | N2  | Si1 | C66 | Ni2 | -28.50(12)  |
| N2  | Si1 | C66 | Ni3 | 27.8(4)     | N2  | Si1 | C66 | C67 | 178.5(4)    |
| C66 | Si1 | N2  | Ni1 | -47.91(13)  | C66 | Si1 | N2  | Ni2 | 30.48(14)   |
| C66 | Si1 | N2  | C54 | 175.6(2)    | C1  | Si1 | C7  | C8  | -8.5(3)     |
| C1  | Si1 | C7  | C12 | 177.2(3)    | C7  | Si1 | C1  | C2  | 127.7(2)    |
| C7  | Si1 | C1  | C6  | -53.7(3)    | C1  | Si1 | C66 | Ni1 | -80.86(12)  |
| C1  | Si1 | C66 | Ni2 | -149.71(11) | C1  | Si1 | C66 | Ni3 | -93.5(4)    |
| C1  | Si1 | C66 | C67 | 57.3(4)     | C66 | Si1 | C1  | C2  | 5.3(2)      |
| C66 | Si1 | C1  | C6  | -176.05(18) | C7  | Si1 | C66 | Ni1 | 159.41(13)  |
| C7  | Si1 | C66 | Ni2 | 90.56(15)   | C7  | Si1 | C66 | Ni3 | 146.8(3)    |
| C7  | Si1 | C66 | C67 | -62.4(5)    | C66 | Si1 | C7  | C8  | 113.8(3)    |
| C66 | Si1 | C7  | C12 | -60.6(3)    | Ni1 | Si2 | C13 | C14 | -21.8(2)    |
| Ni1 | Si2 | C13 | C18 | 160.91(15)  | Ni1 | Si2 | C19 | C20 | 134.76(19)  |
| Ni1 | Si2 | C19 | C24 | -48.2(2)    | Ni3 | Si2 | C13 | C14 | -88.0(2)    |
| Ni3 | Si2 | C13 | C18 | 94.67(18)   | Ni3 | Si2 | C19 | C20 | -159.90(12) |
| Ni3 | Si2 | C19 | C24 | 17.1(4)     | Ni5 | Si2 | C13 | C14 | -151.67(17) |

|     |     |     |     |             |     |     |     |     |             |
|-----|-----|-----|-----|-------------|-----|-----|-----|-----|-------------|
| Ni5 | Si2 | C13 | C18 | 31.0(2)     | Ni5 | Si2 | C19 | C20 | -102.3(2)   |
| Ni5 | Si2 | C19 | C24 | 74.7(2)     | C13 | Si2 | C19 | C20 | 11.8(2)     |
| C13 | Si2 | C19 | C24 | -171.2(2)   | C19 | Si2 | C13 | C14 | 95.9(2)     |
| C19 | Si2 | C13 | C18 | -81.4(2)    | Ni2 | Si3 | C25 | C26 | -17.8(4)    |
| Ni2 | Si3 | C25 | C30 | 163.9(3)    | Ni2 | Si3 | C31 | C32 | -112.7(3)   |
| Ni2 | Si3 | C31 | C36 | 63.0(3)     | Ni2 | Si3 | C77 | Ni3 | 10.11(11)   |
| Ni2 | Si3 | C77 | Ni4 | 58.6(3)     | Ni2 | Si3 | C77 | Ni5 | -62.41(15)  |
| Ni2 | Si3 | C77 | N6  | -149.6(3)   | Ni3 | Si3 | C25 | C26 | 54.7(4)     |
| Ni3 | Si3 | C25 | C30 | -123.7(3)   | Ni3 | Si3 | C31 | C32 | 176.40(19)  |
| Ni3 | Si3 | C31 | C36 | -7.9(4)     | Ni3 | Si3 | C77 | Ni3 | 0.000(11)   |
| Ni3 | Si3 | C77 | Ni4 | 48.5(3)     | Ni3 | Si3 | C77 | Ni5 | -72.52(14)  |
| Ni3 | Si3 | C77 | N6  | -159.7(4)   | C25 | Si3 | C31 | C32 | 6.9(4)      |
| C25 | Si3 | C31 | C36 | -177.4(3)   | C31 | Si3 | C25 | C26 | -135.1(3)   |
| C31 | Si3 | C25 | C30 | 46.5(4)     | C25 | Si3 | C77 | Ni3 | -115.35(13) |
| C25 | Si3 | C77 | Ni4 | -66.9(3)    | C25 | Si3 | C77 | Ni5 | 172.13(14)  |
| C25 | Si3 | C77 | N6  | 85.0(4)     | C77 | Si3 | C25 | C26 | 109.6(3)    |
| C77 | Si3 | C25 | C30 | -68.7(4)    | C31 | Si3 | C77 | Ni3 | 126.72(12)  |
| C31 | Si3 | C77 | Ni4 | 175.2(3)    | C31 | Si3 | C77 | Ni5 | 54.21(18)   |
| C31 | Si3 | C77 | N6  | -33.0(4)    | C77 | Si3 | C31 | C32 | 126.0(3)    |
| C77 | Si3 | C31 | C36 | -58.3(3)    | Ni4 | Si4 | N4  | C67 | -19.14(19)  |
| Ni4 | Si4 | N4  | C68 | 169.87(17)  | Ni4 | Si4 | C37 | C38 | -115.88(18) |
| Ni4 | Si4 | C37 | C42 | 63.3(2)     | Ni4 | Si4 | C43 | C44 | 83.4(2)     |
| Ni4 | Si4 | C43 | C48 | -87.50(17)  | N4  | Si4 | C37 | C38 | 109.5(2)    |
| N4  | Si4 | C37 | C42 | -71.3(2)    | C37 | Si4 | N4  | C67 | 117.13(17)  |
| C37 | Si4 | N4  | C68 | -53.9(2)    | N4  | Si4 | C43 | C44 | -157.25(19) |
| N4  | Si4 | C43 | C48 | 31.8(2)     | C43 | Si4 | N4  | C67 | -122.83(17) |
| C43 | Si4 | N4  | C68 | 66.2(2)     | C37 | Si4 | C43 | C44 | -41.1(2)    |
| C37 | Si4 | C43 | C48 | 147.99(17)  | C43 | Si4 | C37 | C38 | -6.8(3)     |
| C43 | Si4 | C37 | C42 | 172.34(17)  | Ni1 | N2  | C54 | C55 | 50.2(3)     |
| Ni1 | N2  | C54 | C56 | 170.23(16)  | Ni1 | N2  | C54 | C57 | -70.5(3)    |
| Ni2 | N2  | C54 | C55 | -51.2(3)    | Ni2 | N2  | C54 | C56 | 68.8(3)     |
| Ni2 | N2  | C54 | C57 | -171.90(14) | Si1 | N2  | C54 | C55 | 174.2(2)    |
| Si1 | N2  | C54 | C56 | -65.7(4)    | Si1 | N2  | C54 | C57 | 53.6(4)     |
| Si4 | N4  | C67 | Ni3 | 14.8(4)     | Si4 | N4  | C67 | C66 | -167.1(5)   |
| Si4 | N4  | C68 | C69 | -130.2(3)   | Si4 | N4  | C68 | C70 | 108.4(3)    |
| Si4 | N4  | C68 | C71 | -11.6(4)    | C67 | N4  | C68 | C69 | 59.8(3)     |
| C67 | N4  | C68 | C70 | -61.7(4)    | C67 | N4  | C68 | C71 | 178.4(2)    |
| C68 | N4  | C67 | Ni3 | -173.0(2)   | C68 | N4  | C67 | C66 | 5.1(8)      |
| Ni4 | N6  | C77 | Ni3 | 43.4(3)     | Ni4 | N6  | C77 | Ni4 | -0.000(15)  |



|     |     |     |     |             |     |     |     |     |             |
|-----|-----|-----|-----|-------------|-----|-----|-----|-----|-------------|
| Ni4 | N6  | C77 | Ni5 | 92.42(9)    | Ni4 | N6  | C77 | Si3 | -163.7(4)   |
| Ni4 | N6  | C78 | C79 | -72.7(3)    | Ni4 | N6  | C78 | C80 | 45.2(4)     |
| Ni4 | N6  | C78 | C81 | 167.76(18)  | Ni5 | N6  | C77 | Ni3 | -49.0(3)    |
| Ni5 | N6  | C77 | Ni4 | -92.42(9)   | Ni5 | N6  | C77 | Ni5 | 0.000(14)   |
| Ni5 | N6  | C77 | Si3 | 103.9(4)    | Ni5 | N6  | C78 | C79 | 69.2(4)     |
| Ni5 | N6  | C78 | C80 | -172.9(2)   | Ni5 | N6  | C78 | C81 | -50.3(5)    |
| C77 | N6  | C78 | C79 | -179.1(3)   | C77 | N6  | C78 | C80 | -61.2(5)    |
| C77 | N6  | C78 | C81 | 61.4(4)     | C78 | N6  | C77 | Ni3 | 173.3(3)    |
| C78 | N6  | C77 | Ni4 | 129.9(3)    | C78 | N6  | C77 | Ni5 | -137.7(4)   |
| C78 | N6  | C77 | Si3 | -33.8(6)    | Si1 | C1  | C2  | C3  | 179.15(17)  |
| Si1 | C1  | C6  | C5  | -178.11(18) | C2  | C1  | C6  | C5  | 0.5(4)      |
| C6  | C1  | C2  | C3  | 0.4(4)      | C1  | C2  | C3  | C4  | -1.0(4)     |
| C2  | C3  | C4  | C5  | 0.7(5)      | C3  | C4  | C5  | C6  | 0.2(5)      |
| C4  | C5  | C6  | C1  | -0.9(5)     | Si1 | C7  | C8  | C9  | -175.2(2)   |
| Si1 | C7  | C12 | C11 | 174.9(3)    | C8  | C7  | C12 | C11 | 0.2(6)      |
| C12 | C7  | C8  | C9  | -0.6(6)     | C7  | C8  | C9  | C10 | 0.2(6)      |
| C8  | C9  | C10 | C11 | 0.7(6)      | C9  | C10 | C11 | C12 | -1.1(7)     |
| C10 | C11 | C12 | C7  | 0.7(7)      | Si2 | C13 | C14 | C15 | -175.85(18) |
| Si2 | C13 | C18 | C17 | 175.54(19)  | C14 | C13 | C18 | C17 | -1.9(4)     |
| C18 | C13 | C14 | C15 | 1.6(4)      | C13 | C14 | C15 | C16 | -0.4(5)     |
| C14 | C15 | C16 | C17 | -0.6(5)     | C15 | C16 | C17 | C18 | 0.3(5)      |
| C16 | C17 | C18 | C13 | 1.0(5)      | Si2 | C19 | C20 | C21 | 176.8(2)    |
| Si2 | C19 | C24 | C23 | -177.2(2)   | C20 | C19 | C24 | C23 | 0.0(5)      |
| C24 | C19 | C20 | C21 | -0.3(5)     | C19 | C20 | C21 | C22 | 0.1(6)      |
| C20 | C21 | C22 | C23 | 0.3(7)      | C21 | C22 | C23 | C24 | -0.6(7)     |
| C22 | C23 | C24 | C19 | 0.4(7)      | Si3 | C25 | C26 | C27 | -179.6(3)   |
| Si3 | C25 | C30 | C29 | -179.7(3)   | C26 | C25 | C30 | C29 | 1.9(7)      |
| C30 | C25 | C26 | C27 | -1.1(7)     | C25 | C26 | C27 | C28 | -0.4(7)     |
| C26 | C27 | C28 | C29 | 1.1(8)      | C27 | C28 | C29 | C30 | -0.4(9)     |
| C28 | C29 | C30 | C25 | -1.2(9)     | Si3 | C31 | C32 | C33 | 175.7(3)    |
| Si3 | C31 | C36 | C35 | -176.1(3)   | C32 | C31 | C36 | C35 | -0.1(6)     |
| C36 | C31 | C32 | C33 | -0.1(6)     | C31 | C32 | C33 | C34 | -0.2(7)     |
| C32 | C33 | C34 | C35 | 0.7(7)      | C33 | C34 | C35 | C36 | -0.9(7)     |
| C34 | C35 | C36 | C31 | 0.6(7)      | Si4 | C37 | C38 | C39 | -179.34(18) |
| Si4 | C37 | C42 | C41 | 178.1(2)    | C38 | C37 | C42 | C41 | -2.6(4)     |
| C42 | C37 | C38 | C39 | 1.5(4)      | C37 | C38 | C39 | C40 | 1.0(5)      |
| C38 | C39 | C40 | C41 | -2.4(5)     | C39 | C40 | C41 | C42 | 1.3(5)      |
| C40 | C41 | C42 | C37 | 1.3(5)      | Si4 | C43 | C44 | C45 | -172.82(18) |
| Si4 | C43 | C48 | C47 | 172.75(18)  | C44 | C43 | C48 | C47 | 1.3(4)      |

|     |     |     |     |            |     |     |     |     |            |
|-----|-----|-----|-----|------------|-----|-----|-----|-----|------------|
| C48 | C43 | C44 | C45 | -1.7(4)    | C43 | C44 | C45 | C46 | 1.3(5)     |
| C44 | C45 | C46 | C47 | -0.2(5)    | C45 | C46 | C47 | C48 | -0.2(5)    |
| C46 | C47 | C48 | C43 | -0.3(5)    | N3  | C59 | C60 | C64 | 95.1(4)    |
| N3  | C59 | C61 | C65 | 131.5(12)  | N3  | C59 | C62 | C63 | 82.4(9)    |
| N3  | C59 | C62 | C64 | -95.1(4)   | N3  | C59 | C63 | C62 | -108.3(7)  |
| N3  | C59 | C64 | C60 | -99.2(8)   | N3  | C59 | C64 | C62 | 108.5(6)   |
| N3  | C59 | C65 | C61 | -54.0(16)  | C60 | C59 | C61 | C65 | 20.0(14)   |
| C61 | C59 | C60 | C64 | -156.1(7)  | C60 | C59 | C62 | C63 | -160.4(7)  |
| C60 | C59 | C62 | C64 | 22.1(5)    | C62 | C59 | C60 | C64 | -26.2(6)   |
| C60 | C59 | C63 | C62 | 28.2(11)   | C63 | C59 | C60 | C64 | -41.2(8)   |
| C60 | C59 | C64 | C60 | 0.0(5)     | C60 | C59 | C64 | C62 | -152.3(13) |
| C64 | C59 | C60 | C64 | 0.0(13)    | C60 | C59 | C65 | C61 | -161.1(14) |
| C65 | C59 | C60 | C64 | -149.1(7)  | C61 | C59 | C62 | C63 | -36.0(11)  |
| C61 | C59 | C62 | C64 | 146.5(6)   | C62 | C59 | C61 | C65 | -104.6(13) |
| C61 | C59 | C63 | C62 | 148.8(8)   | C63 | C59 | C61 | C65 | -122.3(13) |
| C61 | C59 | C64 | C60 | 51(2)      | C61 | C59 | C64 | C62 | -101.7(18) |
| C64 | C59 | C61 | C65 | -19(3)     | C61 | C59 | C65 | C61 | -0.0(13)   |
| C65 | C59 | C61 | C65 | -0.0(15)   | C62 | C59 | C63 | C62 | 0.0(9)     |
| C63 | C59 | C62 | C63 | -0.0(8)    | C63 | C59 | C62 | C64 | -177.5(12) |
| C62 | C59 | C64 | C60 | 152.3(13)  | C62 | C59 | C64 | C62 | 0.0(5)     |
| C64 | C59 | C62 | C63 | 177.5(14)  | C64 | C59 | C62 | C64 | 0.0(10)    |
| C62 | C59 | C65 | C61 | 87.4(15)   | C65 | C59 | C62 | C63 | -59.9(11)  |
| C65 | C59 | C62 | C64 | 122.6(7)   | C63 | C59 | C64 | C60 | 153.6(9)   |
| C63 | C59 | C64 | C62 | 1.3(6)     | C64 | C59 | C63 | C62 | -2.2(11)   |
| C63 | C59 | C65 | C61 | 60.0(15)   | C65 | C59 | C63 | C62 | 130.8(8)   |
| C64 | C59 | C65 | C61 | 168.1(16)  | C65 | C59 | C64 | C60 | 42.0(17)   |
| C65 | C59 | C64 | C62 | -110.2(11) | C59 | C60 | C64 | C59 | 0.0(2)     |
| C59 | C60 | C64 | C62 | 29.3(12)   | C59 | C61 | C65 | C59 | 0.0(2)     |
| C59 | C62 | C63 | C59 | -0.0(2)    | C59 | C62 | C64 | C59 | 0.0(2)     |
| C59 | C62 | C64 | C60 | -34.0(15)  | C63 | C62 | C64 | C59 | -6(4)      |
| C63 | C62 | C64 | C60 | -40(5)     | C64 | C62 | C63 | C59 | 5(3)       |
| Ni1 | C66 | C67 | Ni3 | -35.9(2)   | Ni1 | C66 | C67 | N4  | 145.6(5)   |
| Ni2 | C66 | C67 | Ni3 | 50.4(2)    | Ni2 | C66 | C67 | N4  | -128.1(5)  |
| Ni3 | C66 | C67 | Ni3 | 0.000(15)  | Ni3 | C66 | C67 | N4  | -178.5(7)  |
| Si1 | C66 | C67 | Ni3 | -162.6(5)  | Si1 | C66 | C67 | N4  | 19.0(10)   |
| N7  | C83 | C84 | C89 | 104.2(4)   | N7  | C83 | C85 | C87 | 85.1(7)    |
| N7  | C83 | C85 | C89 | -103.4(4)  | N7  | C83 | C86 | C88 | 95.7(9)    |
| N7  | C83 | C87 | C85 | -105.0(6)  | N7  | C83 | C88 | C86 | -91.9(10)  |
| N7  | C83 | C89 | C84 | -88.5(6)   | N7  | C83 | C89 | C85 | 104.3(5)   |

|     |     |     |     |            |     |     |     |     |           |
|-----|-----|-----|-----|------------|-----|-----|-----|-----|-----------|
| C84 | C83 | C85 | C87 | -162.6(6)  | C84 | C83 | C85 | C89 | 8.9(4)    |
| C85 | C83 | C84 | C89 | -12.5(6)   | C84 | C83 | C86 | C88 | -17.3(11) |
| C86 | C83 | C84 | C89 | -139.2(6)  | C84 | C83 | C87 | C85 | 25.3(11)  |
| C87 | C83 | C84 | C89 | -26.4(9)   | C84 | C83 | C88 | C86 | 163.8(10) |
| C88 | C83 | C84 | C89 | -145.3(5)  | C84 | C83 | C89 | C84 | -0.0(4)   |
| C84 | C83 | C89 | C85 | -167.2(7)  | C89 | C83 | C84 | C89 | -0.0(6)   |
| C85 | C83 | C86 | C88 | -139.8(10) | C86 | C83 | C85 | C87 | -39.0(9)  |
| C86 | C83 | C85 | C89 | 132.5(5)   | C85 | C83 | C87 | C85 | 0.0(7)    |
| C87 | C83 | C85 | C87 | 0.0(6)     | C87 | C83 | C85 | C89 | 171.5(10) |
| C85 | C83 | C88 | C86 | 49.9(14)   | C88 | C83 | C85 | C87 | -56.6(11) |
| C88 | C83 | C85 | C89 | 114.8(8)   | C85 | C83 | C89 | C84 | 167.2(7)  |
| C85 | C83 | C89 | C85 | 0.0(4)     | C89 | C83 | C85 | C87 | -171.5(9) |
| C89 | C83 | C85 | C89 | -0.0(4)    | C86 | C83 | C87 | C85 | 145.4(7)  |
| C87 | C83 | C86 | C88 | -159.4(10) | C86 | C83 | C88 | C86 | 0.0(10)   |
| C88 | C83 | C86 | C88 | 0.0(10)    | C86 | C83 | C89 | C84 | 63.5(12)  |
| C86 | C83 | C89 | C85 | -103.7(11) | C89 | C83 | C86 | C88 | -56.4(16) |
| C87 | C83 | C88 | C86 | 21.8(11)   | C88 | C83 | C87 | C85 | 137.7(7)  |
| C87 | C83 | C89 | C84 | 162.6(5)   | C87 | C83 | C89 | C85 | -4.6(4)   |
| C89 | C83 | C87 | C85 | 8.0(7)     | C88 | C83 | C89 | C84 | 42.7(9)   |
| C88 | C83 | C89 | C85 | -124.5(7)  | C89 | C83 | C88 | C86 | 137.2(11) |
| C83 | C84 | C89 | C83 | 0.00(13)   | C83 | C84 | C89 | C85 | 13.3(7)   |
| C83 | C85 | C87 | C83 | 0.00(14)   | C83 | C85 | C89 | C83 | -0.00(16) |
| C83 | C85 | C89 | C84 | -16.3(9)   | C87 | C85 | C89 | C83 | 17(2)     |
| C87 | C85 | C89 | C84 | 1(3)       | C89 | C85 | C87 | C83 | -14.6(17) |
| C83 | C86 | C88 | C83 | 0.00(14)   |     |     |     |     |           |

## References

- (1) H. Watanebe, T. Muraoka, M. Kageyama, K. Yoshizumi, Y. Nagai, *Organometallics* 1984, **3**, 141-147.
- (2) C. Yanagisawa, S. Yamazoe, Y. Sunada, *ChemCatChem*, 2021, **13**, 169-173.
- (3) F. Neumeier, J. I. Schweizer, L. Meyer, A. G. Sturm, A. Nadj, M. C. Holthausen. N. Auner, *Chem. Eur. J.*, 2017, **23**, 12399-12405.
- (4) M. J. Frisch, G. W. Trucks, H. B. Schlegel, G. E. Scuseria, M. A. Robb, J. R. Cheeseman, G. Scalmani, V. Barone, B. Mennucci, G. A. Petersson, H. Nakatsuji, M. Caricato, X. Li, H. P. Hratchian, A. F. Izmaylov, J. Bloino, G. Zheng, J. L. Sonnenberg, M. Hada, M. Ehara, K. Toyota, R. Fukuda, J. Hasegawa, M. Ishida, T. Nakajima, Y. Honda, O. Kitao, H. Nakai, T. Vreven, J. A. Jr. Montgomery, J. E. Peralta, F. Ogliaro, M. Bearpark, J. J. Heyd, E. Brothers, K. N. Kudin, V. N. Staroverov, T. Keith, R. Kobayashi, J. Normand, K. Raghavachari, A. Rendell, J. C. Burant, S. S. Iyengar, J. Tomasi, M. Cossi, N. Rega, J. M. Millam, M. Klene, J. E. Knox, J. B. Cross, V. Bakken, C. Adamo, J. Jaramillo, R. Gomperts, R. E. Stratmann, O. Yazyev, A. J. Austin, R. Cammi, C. Pomelli, J. W. Ochterski, R. L. Martin, K. Morokuma, V. G. Zakrzewski, G. A. Voth, P. Salvador, J. J. Dannenberg, S. Dapprich, A. D. Daniels, O. Farkas, J. B. Foresman, J. V. Ortiz, J. Cioslowski, D. J. Fox, Gaussian 09, Revision C.01; Gaussian, Inc., Wallingford, CT, 2010
- (5) Y. Zhao, D. G. Truhlar, *Theor. Chem. Acc.* 2008, **120**, 215-241.
- (6) D. Andrae, U. Häußermann, M. Dolg, H. Stoll, H. Preuß, *Theor. Chim. Acta*, 1990, **77**, 123-14.
- (7) M. S. Gordon, *Chem. Phys. Lett.* 1980, **76**, 163-168.
- (8) P. C. Hariharan, J. A. Pople, *Mol. Phys.* 1974, **27**, 209-214.
- (9) P. C. Hariharan, J. A. Pople, *Theor. Chem. Acc.* 1973, **28**, 213-222.
- (10) W. J. Hehre, R. Ditchfield, J. A. Pople, *J. Chem. Phys.* 1972, **56**, 2257-2261.
- (11) R. Ditchfield, W. J. Hehre, J. A. Pople, *J. Chem. Phys.* 1971, **54**, 724-728.
- (12) SIR2008: M. C. Burla, R. Caliandro, M. Camalli, B. Carrozzini, G. L. Casciarano, L. De Caro, C. Giacovazzo, G. Polidori, D. Siliqi, R. Spagna, *J. Appl. Cryst.* 2007, **40**, 609-613.
- (13) International Tables for Crystallography, Vol. C; (Ed. A. J. C. Wilson) Kluwer Academic Publishers, Dordrecht, Netherlands, Table 6.1.1.4, 1992, pp. 572.
- (14) J. A. Ibers, W. C. Hamilton, *Acta Cryst.* 1964, **17**, 781-782.
- (15) J. A. Ibers, W. C. Hamilton, in International Tables for Crystallography, Vol C; (Ed. A. J. C. Wilson), Kluwer Academic Publishers, Dordrecht, Netherlands, Table 4.2.6.8, 1992, pages 219-222.
- (16) D. C. Creagh, J. H. Hubbell, in International Tables for Crystallography, Vol C; (Ed. A. J. C. Wilson), Kluwer Academic Publishers, Boston, Table 4.2.4.3, 1992, pages 200-206.
- (17) CrystalStructure 4.2.5: Crystal Structure Analysis Package, Rigaku Corporation (2000-2017). Tokyo 196-8666, Japan.
- (18) SHELXL Version 2017/1: G. M. Sheldrick, *Acta Cryst.* 2008, **A64**, 112-122.
